# Supplementary material for: Experiences of how services supporting women with perinatal mental health difficulties work with their families: a qualitative study in England
Source: PubMed Central journal article supplement — BMJ Open. 2019 Jul 24;9(7):e030208. doi: 10.1136/bmjopen-2019-030208 (PMC6661627; doi:10.1136/bmjopen-2019-030208), 2019-07-24
Supplement: bmjopen-2019-030208.draft_revisions.pdf [file bmjopen-2019-030208.draft_revisions.pdf]

# BMJ Open

BMJ Open is committed to open peer review. As part of this commitment we make the peer review history of every article we publish publicly available.

When an article is published we post the peer reviewers' comments and the authors' responses online. We also post the versions of the paper that were used during peer review. These are the versions that the peer review comments apply to.

The versions of the paper that follow are the versions that were submitted during the peer review process. They are not the versions of record or the final published versions. They should not be cited or distributed as the published version of this manuscript.

BMJ Open is an open access journal and the full, final, typeset and author-corrected version of record of the manuscript is available on our site with no access controls, subscription charges or pay-per-view fees (<http://bmjopen.bmj.com>).

If you have any questions on BMJ Open's open peer review process please email [info.bmjopen@bmj.com](mailto:info.bmjopen@bmj.com)

# BMJ Open

## Experiences of how services supporting women with perinatal mental health difficulties work with their families: A qualitative study in England

|                               |                                                                                                                                                                                                       |
|-------------------------------|-------------------------------------------------------------------------------------------------------------------------------------------------------------------------------------------------------|
| Journal:                      | <i>BMJ Open</i>                                                                                                                                                                                       |
| Manuscript ID                 | bmjopen-2019-030208                                                                                                                                                                                   |
| Article Type:                 | Research                                                                                                                                                                                              |
| Date Submitted by the Author: | 05-Mar-2019                                                                                                                                                                                           |
| Complete List of Authors:     | Lever Taylor, Billie ; University College London, Billings, Jo; UCL<br>Morant, Nicola; University College London<br>Bick, Debra; University of Warwick<br>Johnson, Sonia; UCL, Division of Psychiatry |
| Keywords:                     | MENTAL HEALTH, QUALITATIVE RESEARCH, Quality in health care < HEALTH SERVICES ADMINISTRATION & MANAGEMENT                                                                                             |
|                               |                                                                                                                                                                                                       |

SCHOLARONE™  
Manuscripts

1  
2  
3 **Title:** Experiences of how services supporting women with perinatal mental health difficulties work with their  
4 families: A qualitative study in England  
5  
6  
7  
8

9 \*Billie Lever Taylor<sup>1</sup>, Jo Billings<sup>1</sup>, Nicola Morant<sup>1</sup>, Debra Bick<sup>2</sup>, Sonia Johnson<sup>1</sup>

10  
11 <sup>1</sup>Division of Psychiatry, University College London, Division of Psychiatry, Maple House, 149 Tottenham  
12 Court Road, London, W1T 7NF.  
13  
14

15  
16 <sup>2</sup>Warwick Clinical Trials Unit, Warwick Medical School, University of Warwick, Gibbet Hill, CV4 7AL.  
17

18  
19 \*corresponding author: Billie Lever Taylor (e-mail: [billie.taylor@ucl.ac.uk](mailto:billie.taylor@ucl.ac.uk)).  
20

21 **Key words:** Perinatal; mental health; qualitative; partners; families  
22  
23

24  
25 **Word count:** 8,941  
26  
27

## 28 **Abstract**

29  
30 **Objectives:** Partners and wider family members play a vital role in relation to women's perinatal mental health,  
31 and clinical guidelines in the UK and internationally recommend that services supporting women with perinatal  
32 mental health difficulties involve and support their families too. However, little is known about family  
33 members' needs and experiences, or whether they feel included by mental health services. This study set out to  
34 explore this.  
35  
36

37  
38 **Methods:** This research formed part of a wider study exploring experiences of perinatal mental health care in  
39 England. The broader study included semi-structured interviews with 52 women across England who received  
40 treatment for a perinatal mental health difficulty, and 32 family members identified by the women as offering  
41 them some support. Data from these 84 interviews that related to how services work with partners and families  
42 were extracted and analysed thematically.  
43  
44

45  
46 **Results:** Analysis identified three overarching themes: 1) the centrality of women's families to their perinatal  
47 mental health and access to support; 2) experiences of partners and families being excluded by services; 3)  
48 ambivalence among women and their families about increasing family involvement/support. We found that  
49 partners and wider families appear to have an important influence on women's perinatal mental health, access to  
50 care, interactions with services, and recovery, but that services tend to focus on individual women (and babies)  
51 with little regard for their wider family context. The complexity of involving and supporting partners and  
52 families, coupled with anxiety about this among women and their families, reinforces the tendency to  
53 marginalise them.  
54  
55

56  
57  
58 **Conclusion:** Involving women's families and providing the support they need is challenging, but important.  
59 Experiences of women and their families of services provided by the National Health Service in England to treat  
60

1  
2  
3 perinatal mental health difficulties suggests a need for greater focus on overcoming barriers to family inclusion  
4 and support.  
5  
6  
7

### 8 9 **Strengths and limitations of this study**

- 10  
11 • This study addressed a gap in the research literature, by interviewing women, their partners, and members of  
12 their wider family about their experiences of how services supporting women with perinatal mental health  
13 difficulties work with families.  
14  
15 • There is increasing policy emphasis on the need for mental health services to include and support families of  
16 perinatal women, but relatively little is known about how this is experienced in practice.  
17  
18 • This study included a large, diverse group of perinatal women and their family members with experience of  
19 a wide variety of mental health services, including mother and baby units, acute psychiatric wards, specialist  
20 perinatal community teams, and generic non-perinatal community teams.  
21  
22 • To our knowledge, this is the first published study to explore experiences of perinatal mental health care  
23 among wider family members as well as women's partners.  
24  
25 • It would have been useful to have explored clinician views of family involvement as well.  
26  
27  
28  
29  
30  
31  
32  
33  
34  
35  
36  
37  
38  
39  
40  
41  
42  
43  
44  
45  
46  
47  
48  
49  
50  
51  
52  
53  
54  
55  
56  
57  
58  
59  
60

## Introduction

Mental health difficulties in the perinatal period (defined as pregnancy and the first year post-birth) are prevalent, affecting women as well as their partners and wider families, as families adjust to caring for a new baby. Research has shown that women's partners very often feel overwhelmed, lonely and frustrated when a woman experiences a perinatal mental health problem (1–3). Partners of women admitted to hospital with severe perinatal mental health difficulties report experiencing trauma, stress, work-related difficulties and relationship problems (4). Almost one in five marriages ends following an episode of postpartum psychosis (5) and maternal postpartum depression is associated with *paternal* postpartum depression (6). While very little research has focused on women's extended families, one study found that - along with partners - siblings, parents and grandparents of women experiencing postnatal depression said the difficulties resulted in "a lot of worry within the family" (7). Research suggests there can be adverse outcomes for children too (8).

Partners and other family members also play a vital role in relation to women's perinatal mental health. Greater perceived support from a woman's partner or own mother is significantly correlated with lower rates of postnatal depression among first-time mothers (9), while having a supportive partner is strongly associated with shorter hospital stays among women with severe perinatal mental health difficulties (10). New mothers are also more likely to turn to their partners for support with their difficulties than to anyone else (11), while some are reluctant to access help because their partners dismiss their symptoms (12).

Best practice guidelines for perinatal mental health in the UK and internationally recommend including women's families in their care and supporting family members as well (13,14). Nevertheless, our recent systematic review and meta-synthesis found that, across a range of countries, partners of women with perinatal mental health difficulties reported feeling marginalised by services and confronted by a largely mother-baby-oriented environment (15). Our meta-synthesis also identified ambivalence on the part of women's partners about seeking greater support and involvement. These findings appeared to be connected to wider social trends: it has been argued that, although fathers increasingly aspire to be more 'involved' in the perinatal period and beyond, societal pressures and norms continue to relegate them to the periphery, while persisting beliefs about masculinity and fatherhood discourage them from seeking support for themselves (16,17).

Despite these insights, the studies identified by the systematic review had important limitations. In particular, many only touched briefly on partners' experiences of services, as part of a wider remit, and it was not always clear to which services or professionals the findings referred. Additionally, no studies were found that

1  
2  
3 investigated views of services among family members other than partners. Given the increasing recognition that  
4 services treating perinatal mental health difficulties need to “think family” (18), further research into partner and  
5 family experiences is needed and may provide useful insights for clinical practice.  
6  
7

8  
9 The present study therefore sought to expand on previous research by exploring the role of partners and wider  
10 families in relation to women’s perinatal mental health and access to services and experiences of family  
11 inclusion by services supporting women with perinatal mental health difficulties. Women’s views were included  
12 along with those of their partners and wider families to allow different perspectives to be considered.  
13  
14  
15  
16

## 17 **Methods**

18  
19 This study was part of a wider research programme exploring the effectiveness of services treating perinatal  
20 mental health difficulties. As part of this research programme qualitative, semi-structured interviews were  
21 conducted with 52 women who had accessed National Health Service (NHS) treatment for a variety of perinatal  
22 mental health difficulties, and 32 of their partners/family members. These interviews explored participants’  
23 views and experiences of a wide range of mental health service(s). The current study focused on analysing those  
24 sections of the interviews relating specifically to experiences of how services worked with partners and families.  
25 NHS ethics approval was obtained (reference: 13/LO/1855).  
26  
27  
28  
29  
30  
31  
32  
33

34  
35 The mental health services which women had accessed, and on which participants thus based their experiences,  
36 were diverse. Details of the main services participants described are given in Table 1. Some women (with a  
37 range of diagnoses) were admitted with their babies to specialist mother and baby units (MBUs), while others  
38 were separated from their babies, as they were admitted to general psychiatric wards with no provision for infant  
39 care. In the community, some women were treated by specialist secondary care perinatal mental health services  
40 (for a range of moderate to severe difficulties), or by specially trained mental health midwives or health visitors  
41 (for milder difficulties). Others received support from generic, non-perinatal mental health services such as  
42 crisis teams (for acute difficulties), multi-disciplinary community mental health teams (for moderate to severe  
43 difficulties), or services offering talking therapies, usually cognitive-behavioural based (for milder difficulties).  
44 Some women also received support from non-perinatal services specialising in particular diagnoses (e.g. early  
45 intervention in psychosis services). Many women accessed more than one service.  
46  
47  
48  
49  
50  
51  
52  
53  
54  
55  
56  
57  
58  
59  
60

**Table 1.** Description of key services included

| Specialist perinatal or non-perinatal service | Type of service                                   | Brief description                                                                                                                 |
|-----------------------------------------------|---------------------------------------------------|-----------------------------------------------------------------------------------------------------------------------------------|
| Specialist perinatal                          | Mother and Baby Unit (MBU)                        | Specialist hospital where mothers with acute mental health difficulties are admitted together with their babies                   |
|                                               | Specialist perinatal community mental health team | Multidisciplinary teams treating women in the community with moderate to severe perinatal mental health difficulties              |
|                                               | Specialist health visitors/midwives               | Health visitors and midwives with additional training to offer support to women with mental health difficulties                   |
| Non-perinatal                                 | General acute psychiatric ward                    | General psychiatric hospitals for adults with mental health difficulties where women can be admitted (without their babies)       |
|                                               | Crisis resolution team                            | Generic multidisciplinary teams offering short-term intensive home treatment to people experiencing an acute mental health crisis |
|                                               | Early intervention in psychosis service           | Multidisciplinary teams offering long-term, intensive support to people experiencing a first episode of psychosis                 |
|                                               | Community mental health team                      | Generic multidisciplinary teams treating adults with moderate to severe mental health difficulties                                |
|                                               | Talking therapy services                          | Generic community services offering brief psychological therapy for anxiety and depression                                        |

## Recruitment

**Women:** Women were recruited from eleven NHS healthcare providers (Trusts), across different areas of England which varied in their urbanicity. Women were purposively sampled to obtain diversity of diagnosis, service use, and socio-demographic background. Inclusion criteria required that women were 16 years or over; English language speakers; had accessed NHS treatment for a perinatal mental health difficulty (during or after their most recent pregnancy); and had a baby aged 6-9 months old. Eligible women were identified and approached by a clinician within their mental health team. Those expressing an interest in participating were contacted by a researcher to provide them with more information about the study and obtain informed written consent if they were willing to take part. It was not possible to determine how many women refused participation as researchers were only informed of those who were interested.

1  
2  
3 **Family members:** For each participating woman, a partner or other family member was also interviewed  
4 wherever possible. Women were asked if they were able/willing to identify a family member, with some  
5 involvement in supporting them, and ask them if they might be willing to take part too (although women could  
6 still participate even if noone from their family could be interviewed). A researcher got in touch with family  
7 members who were potentially willing to provide them with more information about the study. Informed written  
8 consent was obtained from all participating family members. Inclusion criteria required that participating family  
9 members were: 16 years or over; English language speakers; and were the partner/family member of a  
10 participating woman with some involvement in supporting her.  
11  
12  
13  
14  
15  
16  
17

## 18 **Data collection**

19  
20  
21  
22 Interviews took place between June 2015 and March 2017, usually in participants' homes. Participants were  
23 asked, in semi-structured interviews lasting around an hour in total, about their views and experiences of all the  
24 services women had accessed for their perinatal mental health. As outlined, the current study focuses  
25 specifically on the interview sections relating to partner/family involvement. Specifically, women were asked:  
26 *Can you describe how services and professionals worked with other people who were supporting you and your*  
27 *baby (e.g. your partner, baby's father, family members, or friends)?* Partners/family members were asked: *What*  
28 *has been your role in supporting [mother] through this period? Can you describe how involved you have felt in*  
29 *[mother's] support and treatment? Can you describe any support you've received from services or professionals*  
30 *as someone supporting a mother who is having difficulties?* Follow-up probes to these main questions were used  
31 as appropriate to encourage participants to give full accounts of their experiences. Given the qualitative nature  
32 of the study, related issues were sometimes also touched on elsewhere in their interviews and were included in  
33 the analysis where relevant.  
34  
35  
36  
37  
38  
39  
40  
41  
42  
43  
44  
45

46 Interviews with women were carried out separately to family members, with a few exceptions. Most interviews  
47 (n=70) were conducted by the first author, who is a clinical psychologist, researcher and mother. A small  
48 number (n=14) were also carried out by: a professor of social work; a member of the study's perinatal service  
49 user and carer advisory group; and two MSc students studying clinical mental health sciences.  
50  
51  
52  
53

## 54 **Analysis**

55  
56  
57 Interviews were audio-recorded, transcribed and anonymised. Researcher notes were also written up after each  
58 interview. In two cases, interviews were accidentally not recorded and researcher notes were analysed instead.  
59  
60



1  
2  
3 Thematic analysis was used (19), with themes and subthemes identified in a cyclical process of reading, coding  
4 and exploring patterns in the data. To enhance validity, a second researcher independently coded nine interviews  
5 with women and seven with family members, with consensus reached on the coding frame through discussion.  
6  
7

8  
9 Analysis was facilitated by using NVivo qualitative analysis software. Given the large number of interviews,  
10 two separate datasets were created: one for women and one for family members. Participants in each dataset  
11 were also categorised by the type(s) of service women accessed. Contrasts were explored across participant  
12 groups and services: several key themes were universally reported across different groups but findings unique to  
13 types of participant (e.g. male partners) or service (e.g. MBUs) were also identified.  
14  
15  
16  
17  
18

## 19 **Patient and public involvement**

20  
21 Interview guides were developed by the research team and reviewed by a perinatal service user and carer  
22 advisory group (with experience of perinatal mental health care). Pilot interviews were carried out with one  
23 woman and one partner from this group, as well as four other women who had accessed perinatal mental health  
24 support, and two of their partners/relatives. Five of the study interviews were then carried out by a mother from  
25 the advisory group, and another mother from this group, along with two partners, also reviewed the manuscript  
26 which was edited based on their feedback.  
27  
28  
29  
30  
31  
32  
33

## 34 **Results**

### 35 **Characteristics of participants**

36  
37  
38 Tables 2 and 3 show participants' characteristics. Women had a range of diagnoses including depression,  
39 psychotic disorders, personality disorder, and anxiety disorders. Their mean age was 32 years (range: 19-43) and  
40 around two thirds were living with a partner.  
41  
42  
43  
44  
45

46  
47 Just over two thirds of participating family members were women's partners (one female, the others male),  
48 while around a fifth were parents of participating women (referred to as 'grandparents'). The mean age of  
49 women's partners was 34 years (range: 23-48), while for grandparents it was 54 years (range: 39-67) (the young  
50 age of grandparents may reflect the fact that they were often the chosen source of support for the younger and  
51 single mothers included).  
52  
53  
54  
55  
56  
57  
58  
59  
60

**Table 2.** Key characteristics of participating women (N=52)

| Characteristics                                         | Category                            | Respondents (n; %)        |
|---------------------------------------------------------|-------------------------------------|---------------------------|
| Primary diagnosis                                       | Depression                          | 19 (37%)                  |
|                                                         | Psychosis/bipolar/schizophrenia     | 13 (25%)                  |
|                                                         | Personality disorder                | 11 (21%)                  |
|                                                         | Anxiety                             | 9 (17%)                   |
| Service used<br>(women could use more than one service) | Perinatal                           |                           |
|                                                         | MBU                                 | 10 (19%)                  |
|                                                         | Specialist perinatal community team | 18 (35%)                  |
|                                                         | Specialist health visitors/midwives | 12 (23%)                  |
|                                                         | Non-perinatal                       |                           |
|                                                         | General acute ward/crisis house     | 11 (21%)                  |
|                                                         | Crisis resolution team              | 17 (33%)                  |
|                                                         | Community mental health team        | 15 (29%)                  |
| Talking therapy service                                 |                                     | 10 (19%)                  |
|                                                         | Early intervention in psychosis     | 3 (6%)                    |
| Previous service use for mental health                  | Yes                                 | 42 (81%)                  |
|                                                         | No                                  | 10 (19%)                  |
| Age                                                     | Mean age                            | 32 yrs (range: 19-43 yrs) |
|                                                         | < 25 years                          | 6 (12%)                   |
|                                                         | 25 - 29 years                       | 12 (23%)                  |
|                                                         | 30 - 39                             | 29 (56%)                  |
|                                                         | > 39 years                          | 5 (10%)                   |
| Ethnicity                                               | White British                       | 28 (54%)                  |
|                                                         | White Other                         | 6 (12%)                   |
|                                                         | Black Caribbean                     | 5 (10%)                   |
|                                                         | Black African                       | 4 (8%)                    |
|                                                         | Black other                         | 2 (4%)                    |
|                                                         | Asian                               | 4 (8%)                    |
|                                                         | Arab                                | 1 (2%)                    |
|                                                         | Mixed Race                          | 2 (4%)                    |
| Work status                                             | Employed full-time                  | 1 (2%)                    |
|                                                         | Self-employed part-time             | 2 (4%)                    |
|                                                         | Maternity leave                     | 22 (42%)                  |
|                                                         | Unemployed/homemaker                | 23 (44%)                  |
|                                                         | Unable to work due to illness       | 4 (8%)                    |
| Level of education                                      | No formal qualifications            | 8 (15%)                   |
|                                                         | Secondary leaving qualifications    | 22 (42%)                  |
|                                                         | Undergraduate degree                | 10 (19%)                  |
|                                                         | Postgraduate degree                 | 12 (23%)                  |
| Living with partner                                     | Yes                                 | 35 (67%)                  |
|                                                         | No                                  | 17 (33%)                  |
| Number of children                                      | 1                                   | 26 (50%)                  |
|                                                         | 2                                   | 13 (25%)                  |
|                                                         | 3+                                  | 13 (25%)                  |
| Custody status                                          | Retained custody of baby            | 47 (90%)                  |
|                                                         | Not in custody of baby              | 5 (10%)                   |

**Table 3.** Key characteristics of participating family members (N=32)

| Characteristics        | Category                           | Respondents (n; %)        |
|------------------------|------------------------------------|---------------------------|
| Relationship to mother | Husband/partner                    | 22 (69%)                  |
|                        | Mother/father ('grandparent')      | 7 (22%)                   |
|                        | Other relative (e.g. sister/child) | 3 (9%)                    |
| Age                    | Mean age (partners)                | 34 yrs (range: 23-48 yrs) |
|                        | Mean age (grandparents)            | 54 yrs (range: 39-67 yrs) |
|                        | Mean age (other relatives)         | 21 yrs (range: 17-24 yrs) |
|                        | < 25 years                         | 4 (13%)                   |
|                        | 25 - 29 years                      | 8 (25%)                   |
|                        | 30 - 39                            | 10 (31%)                  |
| Ethnicity              | > 39 years                         | 10 (31%)                  |
|                        | White British                      | 19 (59%)                  |
|                        | White Other                        | 6 (19%)                   |
|                        | Black Caribbean                    | 5 (16%)                   |
|                        | Black African                      | 2 (6%)                    |
|                        | Black other                        | 2 (6%)                    |
| Living with mother     | Asian                              | 3 (9%)                    |
|                        | Yes                                | 26 (81%)                  |
|                        | No                                 | 6 (19%)                   |
| Work status            | Employed full-time                 | 15 (47%)                  |
|                        | Employed part-time                 | 1 (3%)                    |
|                        | Self-employed full-time            | 4 (13%)                   |
|                        | Self-employed part-time            | 1 (3%)                    |
|                        | Student                            | 3 (9%)                    |
|                        | Unemployed/retired/carer           | 8 (25%)                   |
| Level of education     | No formal qualifications           | 1 (3%)                    |
|                        | Secondary leaving qualifications   | 19 (59%)                  |
|                        | Undergraduate degree               | 6 (19%)                   |
|                        | Postgraduate degree                | 5 (16%)                   |
|                        | Not recorded                       | 1 (3%)                    |

## Overview of themes

Three overarching themes were identified in the analysis: 1) the centrality of women's families to their perinatal mental health and access to support; 2) experiences of partners and families being excluded by services; 3) ambivalence among women and family members about increasing family involvement/support. Table 4 shows sub-themes for these, each of which is presented and elaborated on in the text below. Given the large and diverse samples included in this study, diagrams 1 and 2 provide an overview of how participants' views and experiences vary in relation to different types of mental health services (diagram 1), and in relation to their status as direct service users (women with perinatal mental health difficulties), partners, or wider family members (diagram 2). Overall, women, their partners, and wider family members considered families were marginalised by services and should be better included and supported. But they also described some unique

anxieties about this. While all types of mental health service were reported to marginalise families, MBUs were seen as the most inclusive.

**Table 4. Themes and sub-themes identified**

| Themes                                                                                | Sub-themes                                                                                                                                                                                                                                                  |
|---------------------------------------------------------------------------------------|-------------------------------------------------------------------------------------------------------------------------------------------------------------------------------------------------------------------------------------------------------------|
| Centrality of women's families to their perinatal mental health and access to support | The role of interpersonal transition and conflict<br>Influence of the family on support and recovery                                                                                                                                                        |
| Experiences of partners and families being excluded by services                       | Overlooking families<br>Lack of support for partners and other family members<br>Difficulties balancing women's and family members' needs<br>Services ill-equipped for complexity of family involvement<br>Structure of services and separation of families |
| Ambivalence about increasing family involvement/support                               | Feared consequences of family inclusion/support<br>Partners and other family members have to 'stay strong'                                                                                                                                                  |

## 1. The centrality of the family to perinatal mental health and access to support

A key finding expressed by women, partners and other family members centred on the importance of women's families to their difficulties, interactions with services, and longer-term recovery. This view was expressed irrespective of diagnosis, with findings indicating that a woman's mental health needs should be addressed with reference to her family and interpersonal context.

### 1.1 The role of interpersonal transition and conflict

Women and their family members described pregnancy and having a baby as a major life transition: it resulted in shifts in their roles, relationships and identities, and this could provoke distress. Though the adjustment could be particularly marked for first-time parents, the addition of further children could also disrupt the status quo. It was conspicuous how frequently participants linked interpersonal conflict and tension to the woman's difficulties.

Women, in particular, often cited discord with their partner or wider family as contributing to, or exacerbating their mental health difficulties. Several described their relationships with partners, as well as with wider family

1  
2  
3 members and friends as having broken down during pregnancy or after giving birth, often leaving them  
4 struggling to cope with their babies singlehandedly. Other women felt frustrated and overburdened, saying their  
5 partners did not help enough with the new baby, or did not really understand how difficult motherhood was.  
6  
7

8  
9 When I first told [my husband] about my depression...he just didn't get it. And it's almost like  
10 anything I say is an attack on him...or 'Oh, well, if you're feeling depressed, imagine how I'm  
11 feeling, you know, trying to work and pay the rent'...So I always feel like I can't tell him my  
12 problems because they're just so irrelevant...And he's self-employed, so if I do want to go out or  
13 something...he's like, 'I can't be turning work down.'...I've not gone out in the evenings since  
14 having the baby...He said, 'Oh, we've had so many problems since the baby was born'...She's  
15 nearly torn us apart.  
16  
17  
18  
19  
20  
21  
22

23 Mother 37  
24

25 Some participants, most commonly women's partners, expressed the view that family relations had become  
26 strained as a result of the woman's mental health difficulties, rather than vice-versa - for example saying they  
27 believed women became difficult, or even suspicious and hostile towards their families, because of postnatal  
28 depression or psychotic delusions. In some cases, women's partners also felt rejected or deprioritised by them  
29 after the birth of the baby, prompting clashes and distress.  
30  
31  
32  
33  
34

35 I've had my own challenges as well with the change in our lives...If I was on [my wife's] list  
36 before, I'm- I was at the bottom of the list, I'm now not on the list...  
37

38 You don't have an adult relationship in the same way that you did...You know, I come in from work  
39 and [my wife] wants to get to bed early if she's tired. So you have those sort of like clashes really.  
40  
41  
42

43 Partner 4  
44  
45

46 These turbulent relationship shifts were not confined only to women and their partners. Sometimes grandparents  
47 or, less frequently, other relatives were also heavily involved (e.g. where women's relationships with their  
48 partners had broken down) and, in such cases, the birth of a baby often necessitated a reorganisation of wider  
49 family relations too. For example, one single mother was living with her father and he associated her difficulties  
50 partly with their own shifting relationship in the context of a new baby.  
51  
52  
53

54 I know that at the moment [my daughter's] suffering with a bit of postnatal depression...I know  
55 because she has screaming rows...  
56  
57  
58  
59  
60

1  
2  
3 When we argue about stuff, the crux of the argument, when we're sort of nose to nose is, 'I'm not  
4 your bloody boyfriend and I'm not his dad. You don't get to-, if I was his dad you could talk to me  
5 like that...But I'm not, I'm your dad.' And from [my daughter's] point of view it's like, 'I'm raising  
6 this baby on my own'...That kicks me right in the teeth because it's like, 'I'm here.'

7  
8  
9  
10  
11 Grandparent 3

12  
13 Overall, although it was the women who had been given the diagnosis of a perinatal mental health problem,  
14 their difficulties were frequently embedded within a complex and fraught wider interpersonal context, where the  
15 whole family was struggling.

## 16 17 18 19 20 **1.2 Influence of the family on support and recovery**

21  
22 Women's contact with mental health services took place in the context of the complex, shifting family dynamics  
23 described. It was clear that family circumstances, and the attitudes and behaviours of family members,  
24 influenced women's access to support, interactions with services, and recovery. Women who had some of the  
25 'worst' outcomes (e.g. those who had multiple hospital admissions or had lost custody of their babies) were  
26 typically living in particularly challenging family contexts, categorised by conflict, relationship breakdown, and  
27 sometimes violence and abuse from partners or other family members. When women perceived their families to  
28 be unsupportive or dismissive of their struggles, it could increase or prolong their distress.

29  
30 [My husband] was like... 'You're not the woman I thought you were. This behaviour is just awful.  
31 You're not loving the children.' And it just wasn't working. And then eventually it got worse, I  
32 think I, within two weeks anyway I was like completely suicidal.

33  
34  
35  
36  
37  
38  
39  
40  
41  
42  
43 Mother 11

44  
45 In a few cases, partners or other family members put pressure on women not to access support. This could be  
46 because they were anxious about women taking medication, or feared professionals might judge the family  
47 negatively, or even take the baby away. In some cases, women turned down treatment because of perceived  
48 family resistance; in other cases they kept their treatment secret.

49  
50 The [perinatal mental health nurse] had actually suggested that maybe [my wife] might want to go  
51 into a mother and baby care unit. And I was very against that. I think that's just my, I was kind of  
52 really fearful that if we got into that situation, it'd be something that would be on some paperwork  
53 for the rest of our lives. And who knows how somebody's going to interpret that in the future.

Partner 1

On the other hand, there were numerous instances where partners and other family members were supportive of women's treatment and recovery. They were often seen (by women in particular) as instrumental in identifying women's difficulties, encouraging them to get help, and assisting their recovery, with some family members describing their relief when women accessed support. Women with proactive family members supporting and advocating for them seemed to get access to professional support more readily than those without.

I was like, 'Mum don't take me to the [doctor], they're going to take the baby away and they'll think I'm crazy' ...And she was just like, 'But you need help and they're not just going to take her away. I'm here. I'm able to look after her.'

Mother 13

When women struggled, their partners and wider families frequently took over household chores or helped more with the baby, for example doing night feeds or looking after the baby while the woman attended appointments or was hospitalised. Taking on extra responsibilities put a strain on partners and wider families as well and, in some cases, they also blamed themselves for what had happened.

It made me realise that when I had my first two my mum, bless her, she used to have [my baby] every weekend, so I could get sleep because he never slept. But it made such a difference. And not having her this time, I think that's a big cause of postnatal depression nowadays, is that families don't live near each other.

Mother 31

As a man, or partner, husband, you feel like it's your fault your partner is the way that they are...Maybe I've not loved her enough. Maybe I've not helped enough. But really, in essence, you're probably doing as much as you can, or doing more than what you normally do...I blamed myself a little bit, not just for, you know, the pregnancy and the baby, but just, I don't know, everything really.

Partner 15

## 2. Experiences of partners and wider families being excluded by services

Despite their perceived importance, many of those interviewed believed families were excluded by services supporting women with perinatal mental health difficulties. Experiences of this were reported by women, partners and wider family members across different demographics, diagnoses and service types, although MBUs appeared to be more inclusive of families than other services. Analysis suggested that this exclusion of families was manifested in various ways including: not being invited to or included in appointments; not being provided with information about, or helped to understand, the mother's mental health problems; not being involved in treatment decisions; their own distress and difficulties not being acknowledged; and not being offered any support for these difficulties.

### 2.1 Overlooking families

It was common for women and their family members to say that professionals overlooked partners and wider families, focusing their attention exclusively on women and their babies. Mirroring this, some participants conceded that they too had given little thought to family involvement - e.g. not thinking to ask if family members could attend appointments/access support themselves - even if, in hindsight, women and their family members alike thought this could have been valuable.

Within community mental health services in particular (both specialist perinatal services and generic, non-perinatal services) there were sometimes few opportunities for family members to become involved or meet clinicians (e.g. where they weren't invited to appointments), and a sense that there was no real "place for, like, a husband" (partner 15). As a result, women's families often felt poorly informed about their difficulties and treatment: they were unsure exactly what support a woman was receiving, what to expect, and how best to help her.

I wing it every day with supporting [my partner], so I don't know the correct way... There's been no support there to help me. I feel sometimes the best way for me to support [her] is just agree with her and deal with it after... But I don't know whether that's the right way to go about it overall. She's got a [specialist perinatal] psychiatrist. What about support for the dad in this case?

Partner 9



1  
2  
3 A number of women and their family members wanted families to be included in at least some appointments:  
4 they felt this would both allow them to contribute their own observations, and also help them better understand  
5 and support women.  
6  
7

8  
9 It would've been nice to have had a bit more involvement [with the talking therapy] as far as, you  
10 know, meetings or otherwise just so that I have a better grasp to understand what issues we're  
11 dealing with...I guess I didn't know, within the structure of how everything works, how I could get  
12 involved.  
13  
14  
15  
16

17 Partner 5

18  
19 [My husband] wanted to speak to professionals to tell them his side...I would [have liked that too],  
20 just to see, you know, because he's not like the easiest of men, but then he's not responded in a way  
21 that I needed him to respond...And he's never ever approached me in a way he needs to approach  
22 me, so it makes me worse.  
23  
24  
25  
26

27 Mother 50

28  
29 When mental health professionals visited women at home, family members really valued being included and  
30 asked for their input. But some felt they were ignored.  
31  
32  
33

34  
35 I've never really talked to [the early intervention service care coordinator]...Like she comes here  
36 and talks to [my partner]. Doesn't really say much to me or doesn't ask me, 'How do you think she  
37 is?', or things like that. I mean nothing...It would have been nice for her to say, 'Well I'll involve  
38 you in some of the meetings.' But you don't get nothing.  
39  
40  
41

42 Partner 11

43  
44 Where women were admitted to MBUs or psychiatric wards, their families were more likely to have at least  
45 some contact with clinicians on inpatient units. For example, they might speak to them when visiting women or  
46 arranging visits, and some were involved in treatment decisions if women were judged to lack capacity. MBUs  
47 were praised overall for working collaboratively with women's families, regularly communicating with them, as  
48 well as inviting them to be present at ward rounds and taking their views into account. By contrast, family  
49 members had to be proactive and persistent to get staff on general psychiatric wards to keep them updated on the  
50 woman's condition and treatment plan. A few women said staff on acute wards treated them like "a single  
51 person" (mother 44), hardly acknowledging their families, and sometimes not even realising they had a new  
52  
53  
54  
55  
56  
57  
58  
59  
60

1  
2  
3 baby. One man, whose partner stayed on both an MBU and an acute ward, described the MBU as more inclusive  
4  
5 of him than the acute ward.  
6

7 Two or three days go and then I would call [the ward] again because they never, well they hardly  
8  
9 ever called me. It was me trying to find out things all the time.  
10

11 I was asked to attend [meetings at the MBU] if I wanted to. You know, they wanted me to attend to  
12  
13 see...It was run like with partners in mind. They wanted the partners to be involved and to, you  
14  
15 know, to help in the whole process.  
16

17  
18 Partner 14  
19

## 20 21 **2.2 Lack of support for partners and other family members** 22

23 As well as wanting information about and involvement in women's support, some partners and family members  
24  
25 said they would have valued emotional support from mental health professionals themselves, for their own  
26  
27 distress: they wanted help coping with the effects of the woman's mental health problems on them, and  
28  
29 addressing their own difficulties adjusting to life with a new baby. Across our data corpus and regardless of  
30  
31 community, inpatient, perinatal or non-perinatal mental health settings, few accounts were provided of support  
32  
33 targeted at family members.  
34

35 In general, families wanted support to be offered face-to-face or over the telephone, and in particular described  
36  
37 wanting professionals to acknowledge how difficult things were for them, and check how they were doing.  
38  
39 Several partners and other family members felt that nobody was thinking about them.  
40

41 I think it would have been nice if somebody was there to just call me occasionally saying, 'How are  
42  
43 you doing?'...I don't want any sort of physical help from anyone but just talking to someone and  
44  
45 saying, 'You know, let's have a cup of tea, we'll come and see you just to see how things are  
46  
47 going.' That itself would have been great, but I wasn't given any of that [by the community mental  
48  
49 health team]. No, not at all.  
50

51  
52 Grandmother 6  
53

54 I felt I wasn't being more involved, like, and no one's coming to me, like, 'How are you doing?  
55  
56 How is your mental health state?' And all this, you know. Because it's not easy. And I get a bit,  
57  
58 like, okay. Noone's asking me how I am. How about me? I thought, it's not only her going through  
59  
60 this, it's me. I'm there and all.

Partner 7

There were a few exceptions where professionals, most commonly perinatal specialists on MBUs or in the community, had acknowledged family members' needs and engaged with them too, and when this happened it was valued.

[I had] lots of, just informal chats... Different members of the [MBU] staff would ask me how I'm coping, am I alright? How are things at home? And sometimes I sort of took up the offer to sit and have a bit more of a chat.

Partner 12

However, even when support had been offered, it was frequently viewed as superficial, insufficient or too late.

I was offered support [after my wife's MBU admission], but it was all sort of quite late on in the process. And kind of, ultimately, you had a meeting with someone at home. They were very nice. But none of the things that were due to be followed up on were followed up on.

Partner 17

I went to a counselling session [run by specialist health visitors], which was, like, a group counselling session for fathers. And there was four other guys who was all in a similar position... But yes, like I said, that was quite late on. And there was only one, as well, only one counselling session... It should have happened, like months before.

Partner 6

### 2.3 Difficulties balancing the needs of women and their family members

In some cases, rather than simply overlooking partners and wider families, respondents' accounts suggested that clinicians may have excluded partners or family members because of concerns that involving them could reduce the focus on the needs of the woman (and baby), or because they were mindful of the need to protect women's potential desire for confidentiality from their families. These issues were complex: as outlined, some women kept aspects of their mental health or treatment secret from their families, while others described experiencing turbulent, unequal and sometimes coercive and abusive relationships, meaning privacy and time alone with professionals could be vital. Prioritising the needs of women and babies, and keeping a clear focus on them, seemed essential in this context. Yet it could also leave family members feeling shut out. Several family

1  
2  
3 members, across different types of service, described how they had wanted to put across their own opinions (e.g.  
4 if they felt a woman was struggling more than she admitted, or wanted to tell professionals that a woman's  
5 hostility towards them was, in their view, really driven by paranoia, psychosis or similar). But they felt mental  
6 health professionals were unwilling to speak to them or appeared cautious or mistrustful of them (occasionally  
7 also linking this to the female-dominated nature of staff within both perinatal and non-perinatal mental health  
8 services).

9  
10  
11  
12  
13  
14  
15 I wanted to say to the [specialist] health visitor, 'Look maybe do you think that this could be  
16 postnatal depression...?' I would have liked the chance to discuss it with her. Not that I wanted to  
17 encroach on any of [my daughter's] time with her...But alas...If I was in the room then everything  
18 sort of stopped until I left the room, and then they recommenced...The minute I walked in it was  
19 like tumbleweed.  
20  
21  
22  
23  
24

25 Grandparent 3

26  
27 The issue is when it comes to doctors and things like that, they can't talk to me because there's  
28 confidentiality...I've managed to get people to talk to me with [my partner's] consent, but it's a  
29 battle. If I feel something's wrong, but [my partner] won't admit it, so if I feel she's deteriorating  
30 but she's blocking it out, I can't talk to anyone.  
31  
32  
33  
34

35 Partner 14

36  
37 For their part, some women who desired privacy from their families had still wanted them involved in some  
38 way. They wished professionals had helped them negotiate this, offering more options for how this might be  
39 managed.  
40  
41  
42  
43

44 [The community team] haven't told me, 'How would you like us to involve [your husband]?' They  
45 just told me to bring him to my appointments. But I don't want to bring him to my appointments  
46 because they might bring up something that he doesn't know and then that would just cause  
47 problems afterwards...[I'd like to] take him along with me [so he could get] some sort of  
48 understanding... But like I said, it's either come to my appointments or don't get involved.  
49  
50  
51  
52  
53

54 Mother 35

55  
56 However, adding to the complexity, a few participants said that too much emphasis on involving partners or  
57 family members could leave women themselves marginalised. This suggested that professionals at times  
58  
59  
60

1  
2  
3 experienced difficulties determining the appropriate emphasis to place on different people's needs or  
4 perspectives – especially where interpersonal relationships were strained.  
5

6  
7 When you're in hospital, they hardly listen to you. Well, this is my experience, my feeling. That, it's  
8 like they hardly listen to you at all because they know the reason you're in hospital is because  
9 you're unwell. So they listen to [my husband].  
10  
11  
12

13 Mother 26  
14

15  
16 [Her ex-partner would] just have to click his fingers and people would be like, 'Oh okay we'll  
17 change it, we'll change meetings, we'll change times, we'll give you what you want all the  
18 time'...But [the mother is] not allowed to kick up a fuss about it.  
19  
20  
21

22 Relative 2  
23

24 Nevertheless, there were a small number of examples that suggested it was possible to protect women's needs  
25 without excluding their families, even in difficult circumstances. These were usually cases where professionals  
26 had built up a good picture of the family context, for example in non-perinatal mental health teams which had  
27 been involved longer-term, not only during the perinatal period. For example, the partner of one woman (who  
28 had a pre-existing diagnosis of bipolar disorder and experienced postpartum psychosis) described how, although  
29 he initially felt marginalised by community mental health team clinicians, he felt they had got to know the  
30 family situation better over time, and became more adept at meeting both his and his wife's needs.  
31  
32  
33

34 It's been a very fine line to tread for them and they've done it very well...Not making me feel  
35 excluded...Not using confidentiality as a rather convenient way of just not having to deal with  
36 me...But finding sensitive and appropriate you know, professionally appropriate ways around that  
37 so that they get the information they need from me...And that I still feel supported.  
38  
39  
40  
41  
42  
43  
44  
45

46 Partner 12  
47  
48

## 49 **2.4 Services ill-equipped for complexity of family inclusion**

50

51  
52 As the points above suggest, complex interpersonal dynamics between women and their families meant family  
53 involvement was not always straightforward. There were indications that mental health professionals at times  
54 felt ill-equipped or under-resourced to deal with this complexity, marginalising family members as a result. For  
55 example, in one case, a woman believed her perinatal nurse excluded her partner from appointments because she  
56 did not feel suitably trained to deal with the tensions in their relationship. Nobody else, she said, was able to  
57  
58  
59  
60

1  
2  
3 support her partner or see them together either.  
4

5 I'm just, basically like, surprised that there is no support system for carers, or friends, or partners, or  
6 family members, there's no support system whatsoever...

7  
8 [My perinatal mental health nurse] doesn't want to make it worse. It's like a very different, couples  
9 therapy, like dealing with two people in the same room who've got conflict with each other, it's a  
10 very different thing, yes. And like, so I think, I don't know how many years of training it is, but like,  
11 she doesn't have that training, she can't do it, yes.  
12  
13  
14  
15  
16

17 Mother 8

18  
19 There were a few exceptions, where participants described practitioners, most often specialist perinatal  
20 practitioners, as engaging confidently with the family context: this was appreciated.  
21  
22

23  
24 [My perinatal mental health nurse] was meeting with my boyfriend as well at the same time and he  
25 was trying, you know, to help us with the, you know, relationship thing and what is happening and  
26 stuff. No, he was very, very good.  
27  
28  
29

30 Mother 1

31  
32 Yet in other cases, partners and family members believed professionals excluded them because their  
33 perspectives could be awkward or difficult.  
34  
35

36  
37 I'm quite happy to go in there and say to them, 'I don't like the way you're doing this' or, 'I don't  
38 think it's right what you're doing' or, 'you shouldn't be doing it.' And I don't think they liked  
39 it...And I just think it's because, a bit of bad blood between us that they just distanced their self  
40 away.  
41  
42  
43  
44

45 Grandmother 5

46  
47 Where wider families were involved, in particular when grandparents were helping single mothers, they  
48 sometimes also felt that professionals were ill-equipped to consider their unique role and needs. Likewise, in  
49 unconventional family set-ups, family members could feel poorly accommodated, for example where women  
50 had new partners who weren't the baby's biological father.  
51  
52

53  
54 It's a grandad's role... You're looked at from the outside world, from doctors and health  
55 professionals and psychiatric healthcare professionals as a dad in that situation... Because the  
56 dynamic of families has changed, the dynamic of the help that is offered to them should be changed.  
57  
58  
59  
60

Grandparent 3

[Professionals] didn't want to see me as 'Dad'...It's been slightly difficult they didn't accept it.

Partner 22

## 2.5 The structure of services and separation of families

Finally, broader structural issues were sometimes referred to in relation to how and why partners and families were marginalised from services. In particular, participants noted that inpatient admissions involved separating family members from each other, often meaning that partners or relatives cared for babies (or older children) single-handedly while women were hospitalised. While women and their families generally preferred specialist MBU admissions with their babies over acute ward admissions without them, a disadvantage was that family members were separated not only from women but also from babies. Although MBUs were perceived as collaborating better with women's families than other services, some family members felt their set-up made it difficult for families to fit in, and that the consequences for them of the separation were not fully acknowledged.

The only thing that could have been improved on from my perspective was a bit more recognition from the, the nursery nurses...I'm not resident [on the MBU], I haven't got my stuff there. It's, it can be quite tricky to suddenly slot into your father role...Not having had a chance to get to know your baby very much.

Partner 12

A scarcity of MBUs nationwide, and the wide areas they served, also meant women were regularly admitted to facilities far from home, meaning their families often faced long journeys to visit them, with little or no financial support for travel. Nonetheless, MBUs were seen as accommodating family visits well. This contrasted with acute wards, where experiences of visiting were less positive.

You can hear shouting, you can hear screaming...It would be nice to have had a family room away from the ward...You want to take your child for a walk in the gardens...No. You had to be stuck in that room. Like I say, it felt like a prison.

Partner 21

Family members also wanted more support from both MBUs and acute wards post-discharge, to help them readjust to life back at home with a new baby and to cope with any ongoing difficulties. Some felt that a lack of

1  
2  
3 focus on women's wider family contexts meant women were sent home to the same turbulent dynamics in  
4  
5 which their difficulties first arose, resulting in them struggling again.  
6

7  
8 Everything was just put in place with [my daughter]. So there was no following up for me...But if I  
9  
10 got the support...how to help [my daughter]...you know, how to hold her little family together, I  
11  
12 think that would've been so much better. If [the MBU] did something with the parents or  
13  
14 grandparents...because she was coming right back home...so if the support is not there for her... We  
15  
16 didn't hope that [she] would go back in hospital again, but it happened.

17  
18 Grandparent 2

19  
20 In community settings, structural factors could also contribute to marginalising families. This could occur when  
21  
22 women were seen individually in clinics rather than in their home environment, when family members were  
23  
24 invited to appointments but could not attend because they were during working hours, or where support for  
25  
26 family members was offered at inconvenient times and in awkward locations.

27  
28 Professionals don't work at weekends. It's a Monday to Friday profession...They're telling me I  
29  
30 have to take time off during the week to get the support we need but I'm saying, why don't you  
31  
32 work a weekend so we can get the support that we need?  
33

34  
35 Partner 14

36  
37 Across all service types there were indications that participants wanted services to be structured in a way that  
38  
39 was more family-oriented or holistic. In inpatient settings, some participants wished family members could stay  
40  
41 overnight on MBUs, with a few women refusing admission because they did not want their family separated. In  
42  
43 the community, some women (and, less commonly, partners) wanted couples/family therapy, saying their  
44  
45 difficulties had persisted after treatment, and that they saw addressing the interpersonal context as important to  
46  
47 resolving their struggles. There were also examples of women questioning why they were treated/medicated for  
48  
49 what they saw as interpersonal difficulties.

50  
51 It would've been nicer to have sort of a more family, I know it doesn't really exist, but more of a  
52  
53 family place that you could, so your partner and mother, so father, mother, and baby could all go  
54  
55 there. And there'd be support for everybody...I think a lot of people would benefit from it.  
56

57  
58 Partner 21  
59  
60



1  
2  
3 Couples therapy would be incredibly valuable...it's not available...our problem was basically  
4  
5 between the parents.  
6

7  
8  
9  
10  
11  
12  
13  
14  
15  
16  
17  
18  
19  
20  
21  
22  
23  
24  
25  
26  
27  
28  
29  
30  
31  
32  
33  
34  
35  
36  
37  
38  
39  
40  
41  
42  
43  
44  
45  
46  
47  
48  
49  
50  
51  
52  
53  
54  
55  
56  
57  
58  
59  
60  
Mother 8

It's some kind of relationship breakdown that messes up someone's head to the extent that it affects the way they do their everyday things. So, for the system to think that just giving people medicine, especially for me...giving them a pill is not going to take that away...It just didn't make any sense to me.

Mother 46

### 3. Ambivalence about family involvement and support

Despite ostensibly wanting more family inclusion and support, many participants simultaneously seemed unsure about this, suggesting underlying ambivalence. This was not indifference on their part, but rather appeared to relate to anxieties about what greater family involvement or support would mean, whether it might make unmanageable demands on them, or have other undesirable consequences. Women's and their partners' and relatives' mixed feelings about family involvement sometimes seemed to reinforce the tendency for services to marginalise families creating a vicious cycle.

#### 3.1 Feared consequences of family inclusion/support

Women's partners and other family members often described struggling with the burden on them. Many were trying to hold down a job, as well as to support the mothers and cope with the challenges of a new baby.

Although they felt neglected by services, the idea of greater involvement, let alone taking up support themselves, could also feel unmanageable: "Even the thought of going to see a counsellor for an hour was just like, well I just don't have time for it." (Partner 2).

Not only this, some participants appeared resistant to a greater focus on families for fear this might further disrupt their relationships or the 'status quo'. For example, in one case a woman believed her partner was reluctant to be more involved in her support or accept support himself for fear it might require him to face up to problems in their relationship, and change his behaviour and attitude towards her and their baby. Faced with his resistance, she said professionals seemed to back off, rather than persisting in exploring ways to engage with him.

1  
2  
3 I don't think [professionals] tried to help him enough to some degree. But then...he wasn't willing  
4 to work with me and [our baby]...He didn't want to work with them in any way, shape or form. And  
5  
6 too much of self-centred and selfish person. He doesn't want to change...They haven't really tried  
7  
8 to guide him in more taking it. They've left it more for him to do.  
9

10  
11 Mother 33  
12  
13

14  
15 It was also common for women themselves to express anxiety about the idea of family members being involved  
16  
17 in their support, saying they would not 'understand'. This too appeared to relate in part to underlying concerns  
18  
19 about what their involvement might mean for family relationships and whether family members might judge  
20  
21 women negatively. It also seemed connected to underlying anxieties for women about how family inclusion  
22  
23 might affect their protected time with clinicians and autonomy over their treatment, especially for those living in  
24  
25 fraught family contexts. As outlined above, privacy was important for some women and, when family members  
26  
27 were very involved, this could occasionally leave women themselves feeling deprioritised.  
28

### 29 **3.2 Partners and other family members have to 'stay strong'**

30  
31 Even though they struggled when women were distressed, and with the demands of a new baby, partners and  
32  
33 other family members were often uncertain about accepting support themselves. Although they spoke of loss of  
34  
35 sleep, anxiety, depression, stress, increased alcohol use and work-related difficulties, some were adamant that  
36  
37 they did not need or want support themselves. Others expressed the view that they had to 'stay strong' and not  
38  
39 'indulge' their own needs. A few felt more comfortable staying "in the background" (partner 1) and many  
40  
41 seemed only really to find it acceptable for the mother (and baby) to get help.  
42

43  
44 I was looking after [our baby]. I still hadn't recovered from the sleep...So I kind of just, I don't  
45  
46 need anyone's help, I'm just going to do this...And then, you know, after I'd go and see her at the  
47  
48 MBU, and then I would have my cry...because I was in it and it was happening I just thought I  
49  
50 don't really need any help, because it was [my wife] that needed the help.  
51

52 Partner 2  
53

54  
55 Several women also subscribed to the view that their partners and wider families were 'strong' and not in need  
56  
57 of support. This reduced their inclination to focus on their needs or push for support for them.  
58  
59  
60

1  
2  
3 “[My mum] doesn’t need it, like she’s one of those characters that doesn’t need emotional support,  
4 she’s very capable and she would never fall to pieces emotionally.”  
5  
6  
7

8 Mother 11  
9

10 A number of male partners meanwhile explicitly or implicitly connected their hesitation accessing support  
11 (including peer support) to beliefs that it was shameful and unmanly for men to voice needs. Male partners  
12 appeared to place a high value on not being ‘over-dramatic’: they wanted to wait to see if things would resolve  
13 of their own accord, and to work things out by themselves. At times this seemed to be partly connected to  
14 uncertainty about what it was ‘normal’ to feel in the perinatal period. However, there was also a sense that  
15 feelings of neediness challenged men’s sense of self-worth.  
16  
17  
18  
19  
20  
21

22 “The thing is blokes won’t talk, we bottle it up. We won’t talk in a group in a room. If we talk it’s  
23 going to be down at the pub or whatever.”  
24  
25  
26

27 Partner 14  
28

29 As a man, you don’t really need support. You think you can do it on your own, you’ll be fine. I  
30 don’t know how to ask people for help...I wouldn’t like to count on other people to tell me  
31 something that I maybe already know, who feel I don’t know. I like to try and figure out the  
32 problem and solve it myself.  
33  
34  
35  
36  
37

38 Partner 15  
39

40 It was conspicuous that, even when partners and other family members did want help, they often found it  
41 difficult to pinpoint exactly what it was they wanted. Some implied that they were willing to accept support to  
42 help them support women, but were not comfortable with support focused more directly on themselves. Several  
43 participants implied that men, in particular, were more likely to take up support that addressed their own needs  
44 if it was offered in an ‘informal’ or ‘incidental’ way.  
45  
46  
47  
48  
49

50 I kind of enjoy socialising but I don’t like being pushed to meet other people, so yes. That’s just  
51 guys though, more like you know, just they like to do it if it’s natural but if it’s organised you  
52 almost like sniff something, is that a trap?  
53  
54  
55  
56

57 Partner 8  
58  
59  
60

1  
2  
3 This desire for support to be ‘casual’ or ‘understated’ also reinforced the earlier points, where some family  
4 members said they did not so much want formal support, as greater recognition of the challenges they faced.  
5  
6 They wanted to be noticed: for a professional to ask how they were, or to suggest having a “cup of tea” or an  
7  
8 “informal chat”.  
9

## 10 **Discussion**

11  
12 In the UK, the newly published NHS long-term plan (20) emphasises the importance of mental health services  
13  
14 working with and supporting the families of perinatal women, yet relatively little is known about experiences of  
15  
16 this in practice. This study explored views of how services supporting women with perinatal mental health  
17  
18 difficulties work with their families, from the perspectives of women, their partners and wider families. Women  
19  
20 in the study had accessed treatment from a wide array of services for a range of diagnoses and, along with their  
21  
22 partners and family members, gave rich, qualitative accounts of their experiences.  
23  
24

25  
26 Overall, analysis suggested that women’s perinatal mental health difficulties need to be considered with  
27  
28 reference to their family and interpersonal contexts. Contact with services takes place in the midst of complex  
29  
30 relationship dynamics, which are in a state of flux with the arrival of a new baby – with women typically taking  
31  
32 on the bulk of parenting. Although it was the women who had been diagnosed with perinatal mental health  
33  
34 difficulties, their struggles often seemed to signify difficulties between family members, as much as within  
35  
36 individual mothers, and with all members of a family experiencing distress. The perinatal period is a critical risk  
37  
38 time for relationship strain and even domestic violence (21), and women in particular often connected their  
39  
40 perinatal mental health difficulties to familial struggles, with families also playing a major role in relation to  
41  
42 access to support and recovery.  
43

44  
45 Despite this, services were experienced as focusing on individual women (and babies), and not often engaging  
46  
47 in a meaningful way with families or the interpersonal context. Services were seen as being structured in ways  
48  
49 that tended to exclude family members, and professionals were experienced at times as ill-equipped and under-  
50  
51 resourced to work with families. Family members were not regularly included in appointments, kept informed  
52  
53 about women’s treatment, or asked for their own perspective, and there was a lack of acknowledgement of their  
54  
55 needs or support for them. Though there were exceptions, this meant partners and families were often left  
56  
57 feeling marginalised, unheard and unsupported, while women and their families said difficulties sometimes  
58  
59 persisted after treatment because of a lack of wider focus. This study builds on our previous research which  
60  
similarly highlighted the marginalisation of women’s partners across a range of countries and service settings

1  
2  
3 (15). This study suggests this marginalisation extends beyond partners to members of the wider family too.  
4  
5 Although families felt neglected across all types of service, MBUs were generally reported to be better at  
6  
7 engaging with families than other services.  
8

9  
10 Nevertheless, responses also suggested that it could be complex for professionals to balance family inclusion  
11  
12 with the need to protect and prioritise women and their babies. This was especially true in light of women's  
13  
14 fraught and sometimes abusive family contexts and, in some cases, their expressed desire for privacy from their  
15  
16 families. Not only this, although women's families ostensibly wanted to be better included and supported, they  
17  
18 also expressed ambivalence about this. In line with previous research (22,23), perceived norms of masculinity  
19  
20 meant male partners/fathers found it hard to acknowledge their own needs. Likewise, other family members  
21  
22 often believed they had to 'stay strong'. Greater involvement and support could also feel unmanageable, given  
23  
24 how much families already had to cope with, and there were signs too that women and their families were  
25  
26 fearful about the possible disruption to their relationships and the 'status quo' that a greater focus on families  
27  
28 could entail. This appeared to reinforce the tendency for services to overlook and exclude families, which, in  
29  
30 turn, arguably contributed to increasing their perception of their own needs as insignificant in a vicious cycle.

### 31 **Strengths and limitations**

32  
33 This study addressed a gap in the research literature, by interviewing a diverse group of women, as well as their  
34  
35 partners, and wider family members about experiences of how services work with the families of women  
36  
37 diagnosed with perinatal mental health difficulties. Nevertheless, it also had several limitations.

38  
39  
40 Firstly, as this study was nested within a wider research programme, only parts of each interview focused on  
41  
42 experiences of family inclusion, limiting the time that could be spent discussing this topic, particularly as such a  
43  
44 wide array of services were included. While rich data were nevertheless obtained, future research may benefit  
45  
46 from dedicating full interviews to this topic. Secondly, interviews with women and their family members were  
47  
48 analysed separately for the purposes of this paper. However, future research may benefit from analysing 'pairs'  
49  
50 of interviews together to allow closer comparison and contrast of different perspectives. Thirdly, interviews  
51  
52 were carried out at 6-9 months postnatally, when treatment was often very recent or ongoing. It may be valuable  
53  
54 for future research to follow-up families later once they have had longer to reflect on their experiences.

55  
56 Fourthly, it may have been valuable to have involved partners or grandparents in conducting interviews, to see if  
57  
58 this generated unique insights based on shared perspectives. Inevitably researchers' own experiences (e.g. of  
59  
60 motherhood and perinatal mental health care) affect their interactions with participants and interpretations of the

1  
2  
3 data: a male interviewer may, for example, have elicited different data from male partners, but all researchers  
4 were female. Finally, future research would benefit from exploring the perspectives of clinicians too, and  
5 placing greater emphasis on possible solutions to the challenges identified.  
6  
7  
8

## 9 **Implications and conclusions**

10  
11 Study findings suggest that engaging with wider interpersonal networks is challenging and complex, but too  
12 important to ignore. Perinatal mental health difficulties, and access to treatment, do not occur within a vacuum,  
13 but within a wider social and interpersonal context, in which the family plays an influential role. While it is  
14 important not to blame or pathologise families, who themselves are operating within the constraints of their  
15 broader social context (24), the findings suggest a need to approach women's difficulties with greater focus on  
16 their social networks. At the same time, participants' ambivalence about family inclusion and the divergent  
17 needs and wishes expressed means there is a danger in making assumptions about what might be most helpful  
18 for them or how this might best work. Instead, at this stage research evidence is needed evaluating the  
19 effectiveness, acceptability and potential pitfalls of a range of potential approaches, preferably based on co-  
20 production principles to ensure the views of people with relevant lived experience and clinicians are central.  
21  
22  
23  
24  
25  
26  
27  
28  
29  
30

31 Possible approaches that merit further exploration include: (i) considering how to adapt current practice to make  
32 it more family-friendly (e.g. by identifying acceptable ways to include partners/relatives more meaningfully in  
33 (at least some) appointments); (ii) challenging the way service structures currently deprioritise family members'  
34 needs, but also balancing this with protecting women's needs; (iii) developing or adapting couple or family-  
35 focused interventions for perinatal populations: in England, clinical guidelines recommend couple or family  
36 approaches for some perinatal mental health difficulties (24), but such interventions are rarely available and are  
37 largely untested in the perinatal period (21); (iv) developing and testing resources/interventions aimed at  
38 women's partners and wider families, acknowledging that some will themselves also have perinatal mental  
39 health needs. Development of resources/interventions will need to take into account that some family members  
40 express a preference for more 'informal' or 'incidental' forms of support (but also that this may be partly a  
41 result of services treating them as ancillary); (v) trialling specific staff training around engaging with families in  
42 the perinatal period. It is hoped that this may help services think more holistically about families and  
43 acknowledge the needs of the whole family.  
44  
45  
46  
47  
48  
49  
50  
51  
52  
53  
54  
55  
56  
57  
58  
59  
60

### Funding

This paper summarises independent research funded by the National Institute for Health Research (NIHR) under its PGfAR Programme (Grant Reference Number RP-PG-1210-12002). The views expressed are those of the authors and not necessarily those of the NHS, the NIHR or the Department of Health and Social Care. The study team acknowledges the study delivery support given by the local Clinical Research Networks.

SJ is supported by the NIHR Mental Health Research Policy Unit, the NIHR Collaboration for Leadership in Applied Health Research and Care (CLAHRC) North Thames and the UCLH Biomedical Research Centre.

### Author contribution

BLT contributed to study concept and design, data collection, data analysis, interpretation of results and drafting of the manuscript. JB, NM, DB and SJ contributed to study concept and design and drafting of the manuscript.

All authors read and approved the final manuscript.

The authors declare that no competing interests exist.

**Acknowledgements:** The authors are very grateful indeed for the advice and support received from the Perinatal Service User and Carer Advisory Group, and from the wider ESMI study team. The study team would also like to thank all the women and their family members who gave up their time to take part in the study.

## References

1. Davey SJ, Dziurawiec S, O'Brien-Malone A. Men's voices: postnatal depression from the perspective of male partners. *Qual Health Res.* 2006 Feb;16(2):206–20.
2. Engqvist I, Nilsson K. Men's experience of their partners' postpartum psychiatric disorders: narratives from the internet. *Ment Health Fam Med.* 2011 Sep;8(3):137–46.
3. Meighan M, Davis MW, Thomas SP, Droppleman PG. Living with postpartum depression: the father's experience. *MCN Am J Matern Child Nurs.* 1999 Aug;24(4):202–8.
4. Muchena G. Men's experiences of partners' postnatal mental illness. *Nurs Times.* 2007;103(48):32–3.
5. Blackmore ER, Rubinow DR, O'Connor TG, Liu X, Tang W, Craddock N, et al. Reproductive outcomes and risk of subsequent illness in women diagnosed with postpartum psychosis. *Bipolar Disord.* 2013 Jun;15(4):394–404.
6. Paulson JF, Bazemore SD. Prenatal and postpartum depression in fathers and its association with maternal depression: a meta-analysis. *JAMA.* 2010 May 19;303(19):1961–9.
7. Boath EH, Pryce AJ, Cox JL. Postnatal depression: The impact on the family. *J Reprod Infant Psychol.* 1998 May 1;16(2–3):199–203.
8. Stein A, Pearson RM, Goodman SH, Rapa E, Rahman A, McCallum M, et al. Effects of perinatal mental disorders on the fetus and child. *The Lancet.* 2014 Nov 15;384(9956):1800–19.
9. Leahy-Warren P, McCarthy G, Corcoran P. First-time mothers: social support, maternal parental self-efficacy and postnatal depression. *J Clin Nurs.* 2012 Feb;21(3–4):388–97.
10. Grube M. Inpatient treatment of women with postpartum psychiatric disorders--the role of the male partners. *Arch Womens Ment Health.* 2005 Sep;8(3):163–70.
11. Holopainen D. The experience of seeking help for postnatal depression. *Aust J Adv Nurs Q Publ R Aust Nurs Fed.* 2002 May;19(3):39–44.
12. Letourneau N, Duffett-Leger L, Stewart M, Hegadoren K, Dennis C-L, Rinaldi CM, et al. Canadian mothers' perceived support needs during postpartum depression. *J Obstet Gynecol Neonatal Nurs JOGNN.* 2007 Oct;36(5):441–9.
13. Mental health care in the perinatal period (C-Obs-48). The Royal Australian and New Zealand College of Obstetricians and Gynaecologists. [Internet]. 2018. Available from: [https://www.ranzcog.edu.au/RANZCOG\\_SITE/media/RANZCOG-MEDIA/Women%27s%20Health/Statement%20and%20guidelines/Clinical-Obstetrics/Mental-health-care-in-the-perinatal-period-\(C-Obs-48\).pdf?ext=.pdf](https://www.ranzcog.edu.au/RANZCOG_SITE/media/RANZCOG-MEDIA/Women%27s%20Health/Statement%20and%20guidelines/Clinical-Obstetrics/Mental-health-care-in-the-perinatal-period-(C-Obs-48).pdf?ext=.pdf)
14. National Institute for Health and Clinical Excellence. Antenatal and postnatal mental health: clinical management and service guidance, Clinical Guideline CG192. 2014.
15. Lever Taylor B, Billings J, Morant N, Johnson S. How do women's partners view perinatal mental health services? A qualitative meta-synthesis. *Clin Psychol Psychother.* 2018 Jan;25(1):112–29.
16. Machin AJ. Mind the Gap: The expectation and reality of involved fatherhood. *Father J Theory Res Men Parents.* 2015;13(1):36–59.
17. White NR. About Fathers: Masculinity and the Social Construction of Fatherhood. *Aust N Z J Sociol.* 1994 Aug 1;30(2):119–31.
18. Hogg S. All Babies Count: spotlight on perinatal mental health - prevention in mind. National Society for the Prevention of Cruelty to Children; 2013.



- 1
- 2
- 3 19. Braun V, Clarke V. Using thematic analysis in psychology. *Qual Res Psychol*. 2006 Jan 1;3(2):77–101.
- 4
- 5 20. The NHS Long Term Plan [Internet]. 2019. Available from: [https://www.longtermplan.nhs.uk/wp-](https://www.longtermplan.nhs.uk/wp-content/uploads/2019/01/nhs-long-term-plan.pdf)
- 6 [content/uploads/2019/01/nhs-long-term-plan.pdf](https://www.longtermplan.nhs.uk/wp-content/uploads/2019/01/nhs-long-term-plan.pdf)
- 7
- 8 21. Rosan C, Grimas E. (PDF) The power of couple-focused approaches in the perinatal period. *J Fam Health*
- 9 *Care*. 2016;26(1):10–3.
- 10
- 11 22. Allen K. Father experience of postpartum depression. Doctoral Thesis. Alliant International University;
- 12 2010.
- 13
- 14 23. Letourneau N, Duffett-Leger L, Dennis C-L, Stewart M, Tryphonopoulos PD. Identifying the support
- 15 needs of fathers affected by post-partum depression: a pilot study. *J Psychiatr Ment Health Nurs*. 2011
- 16 Feb;18(1):41–7.
- 17
- 18 24. Dallos R, Urry A. Abandoning our parents and grandparents: does social construction mean the end of
- 19 systemic family therapy? *J Fam Ther*. 1999 May;21(2):161–86.
- 20
- 21
- 22
- 23
- 24
- 25
- 26
- 27
- 28
- 29
- 30
- 31
- 32
- 33
- 34
- 35
- 36
- 37
- 38
- 39
- 40
- 41
- 42
- 43
- 44
- 45
- 46
- 47
- 48
- 49
- 50
- 51
- 52
- 53
- 54
- 55
- 56
- 57
- 58
- 59
- 60

Diagram 1. Diagram of key themes expressed regarding different types of mental health service

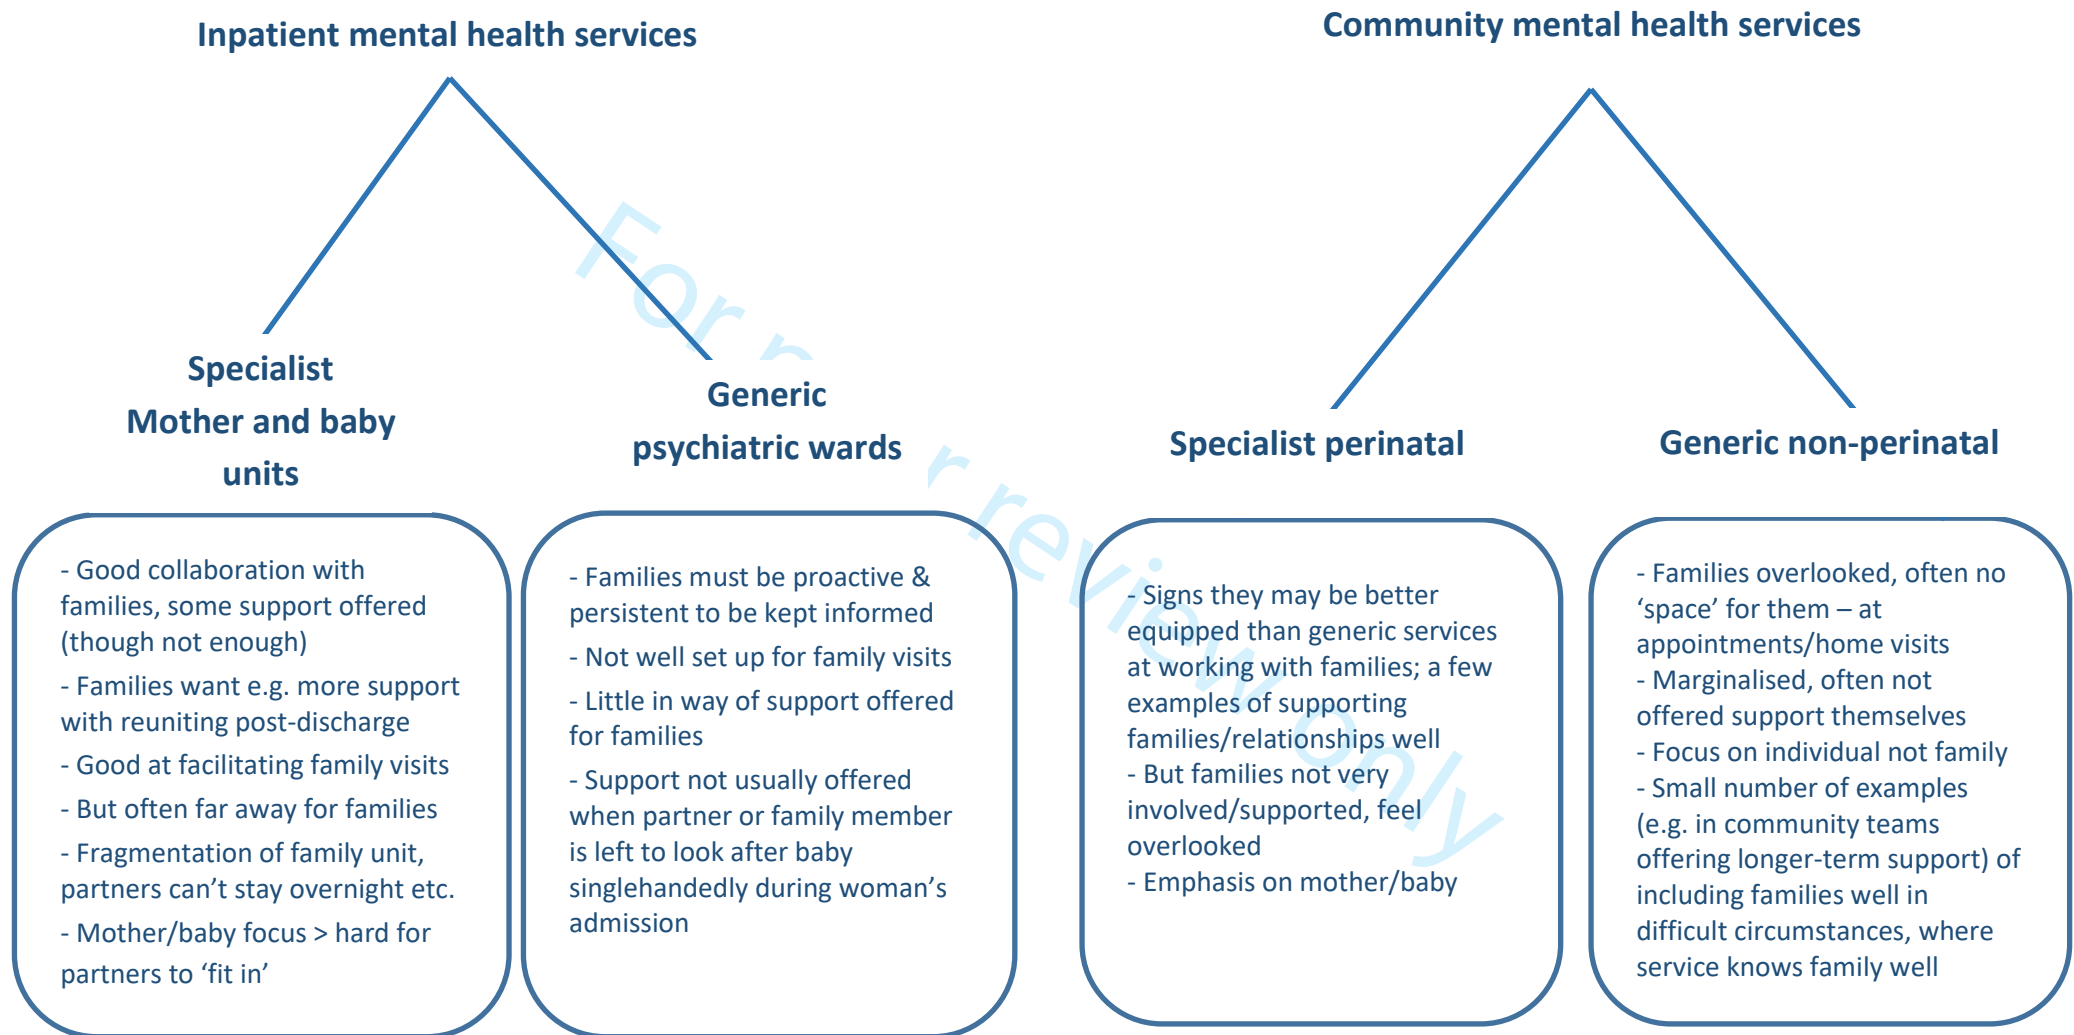

**Diagram 2. Key themes by type of participant****Women**

- Many women say interpersonal conflict contributed to or exacerbated their perinatal distress.
- Believe their partners & families are marginalised, disregarded; want them to be helped to support them better, and offered support themselves.
- Women more likely than partners/other family members to mention wanting couple/family therapy.
- However, they also harbour anxiety about potential of family involvement/support to disrupt relationships further, marginalise their own needs, reduce their autonomy etc. Some women want privacy from their families.

**Partners and wider families**

- Partners and wider families struggle themselves with adjustment to having a new baby; with impact of woman's struggles.
- Feel overlooked, marginalised by services.
- Want to be better informed about how to support women, and want their own needs to be acknowledged – someone to think about them, ask them how they are doing.
- But also they fear greater involvement might be unmanageable – they won't have the time or energy.

**Partners**

- Anxious also about possible destabilising effect of greater focus on them, possibility they might be required to change
- Feel they should 'be strong', not need help, norms of masculinity make it harder for men to accept support
- Say they prefer 'informal or 'incidental' support

**Wider family**

- Face difficulties relating to their unique role not being recognised. For example, grandparents being treated by professionals as a 'substitute partner' where mother is single
- Feel as 'carer' they should 'be strong', not need help, not take attention away from woman

## COREQ (CONsolidated criteria for REporting Qualitative research) Checklist

A checklist of items that should be included in reports of qualitative research. You must report the page number in your manuscript where you consider each of the items listed in this checklist. If you have not included this information, either revise your manuscript accordingly before submitting or note N/A.

| Topic                                          | Item No. | Guide Questions/Description                                                                                                                              | Reported on Page No. |
|------------------------------------------------|----------|----------------------------------------------------------------------------------------------------------------------------------------------------------|----------------------|
| <b>Domain 1: Research team and reflexivity</b> |          |                                                                                                                                                          |                      |
| <i>Personal characteristics</i>                |          |                                                                                                                                                          |                      |
| Interviewer/facilitator                        | 1        | Which author/s conducted the interview or focus group?                                                                                                   |                      |
| Credentials                                    | 2        | What were the researcher's credentials? E.g. PhD, MD                                                                                                     |                      |
| Occupation                                     | 3        | What was their occupation at the time of the study?                                                                                                      |                      |
| Gender                                         | 4        | Was the researcher male or female?                                                                                                                       |                      |
| Experience and training                        | 5        | What experience or training did the researcher have?                                                                                                     |                      |
| <i>Relationship with participants</i>          |          |                                                                                                                                                          |                      |
| Relationship established                       | 6        | Was a relationship established prior to study commencement?                                                                                              |                      |
| Participant knowledge of the interviewer       | 7        | What did the participants know about the researcher? e.g. personal goals, reasons for doing the research                                                 |                      |
| Interviewer characteristics                    | 8        | What characteristics were reported about the interviewer/facilitator? e.g. Bias, assumptions, reasons and interests in the research topic                |                      |
| <b>Domain 2: Study design</b>                  |          |                                                                                                                                                          |                      |
| <i>Theoretical framework</i>                   |          |                                                                                                                                                          |                      |
| Methodological orientation and Theory          | 9        | What methodological orientation was stated to underpin the study? e.g. grounded theory, discourse analysis, ethnography, phenomenology, content analysis |                      |
| <i>Participant selection</i>                   |          |                                                                                                                                                          |                      |
| Sampling                                       | 10       | How were participants selected? e.g. purposive, convenience, consecutive, snowball                                                                       |                      |
| Method of approach                             | 11       | How were participants approached? e.g. face-to-face, telephone, mail, email                                                                              |                      |
| Sample size                                    | 12       | How many participants were in the study?                                                                                                                 |                      |
| Non-participation                              | 13       | How many people refused to participate or dropped out? Reasons?                                                                                          |                      |
| <i>Setting</i>                                 |          |                                                                                                                                                          |                      |
| Setting of data collection                     | 14       | Where was the data collected? e.g. home, clinic, workplace                                                                                               |                      |
| Presence of non-participants                   | 15       | Was anyone else present besides the participants and researchers?                                                                                        |                      |
| Description of sample                          | 16       | What are the important characteristics of the sample? e.g. demographic data, date                                                                        |                      |
| <i>Data collection</i>                         |          |                                                                                                                                                          |                      |
| Interview guide                                | 17       | Were questions, prompts, guides provided by the authors? Was it pilot tested?                                                                            |                      |
| Repeat interviews                              | 18       | Were repeat interviews carried out? If yes, how many?                                                                                                    |                      |
| Audio/visual recording                         | 19       | Did the research use audio or visual recording to collect the data?                                                                                      |                      |
| Field notes                                    | 20       | Were field notes made during and/or after the interview or focus group?                                                                                  |                      |
| Duration                                       | 21       | What was the duration of the interviews or focus group?                                                                                                  |                      |
| Data saturation                                | 22       | Was data saturation discussed?                                                                                                                           |                      |
| Transcripts returned                           | 23       | Were transcripts returned to participants for comment and/or                                                                                             |                      |

| Topic                                  | Item No. | Guide Questions/Description                                                                                                        | Reported on Page No. |
|----------------------------------------|----------|------------------------------------------------------------------------------------------------------------------------------------|----------------------|
|                                        |          | correction?                                                                                                                        |                      |
| <b>Domain 3: analysis and findings</b> |          |                                                                                                                                    |                      |
| <i>Data analysis</i>                   |          |                                                                                                                                    |                      |
| Number of data coders                  | 24       | How many data coders coded the data?                                                                                               |                      |
| Description of the coding tree         | 25       | Did authors provide a description of the coding tree?                                                                              |                      |
| Derivation of themes                   | 26       | Were themes identified in advance or derived from the data?                                                                        |                      |
| Software                               | 27       | What software, if applicable, was used to manage the data?                                                                         |                      |
| Participant checking                   | 28       | Did participants provide feedback on the findings?                                                                                 |                      |
| <i>Reporting</i>                       |          |                                                                                                                                    |                      |
| Quotations presented                   | 29       | Were participant quotations presented to illustrate the themes/findings?<br>Was each quotation identified? e.g. participant number |                      |
| Data and findings consistent           | 30       | Was there consistency between the data presented and the findings?                                                                 |                      |
| Clarity of major themes                | 31       | Were major themes clearly presented in the findings?                                                                               |                      |
| Clarity of minor themes                | 32       | Is there a description of diverse cases or discussion of minor themes?                                                             |                      |

Developed from: Tong A, Sainsbury P, Craig J. Consolidated criteria for reporting qualitative research (COREQ): a 32-item checklist for interviews and focus groups. *International Journal for Quality in Health Care*. 2007. Volume 19, Number 6: pp. 349 – 357

**Once you have completed this checklist, please save a copy and upload it as part of your submission. DO NOT include this checklist as part of the main manuscript document. It must be uploaded as a separate file.**

# BMJ Open

## Experiences of how services supporting women with perinatal mental health difficulties work with their families: A qualitative study in England

|                                 |                                                                                                                                                                                                       |
|---------------------------------|-------------------------------------------------------------------------------------------------------------------------------------------------------------------------------------------------------|
| Journal:                        | <i>BMJ Open</i>                                                                                                                                                                                       |
| Manuscript ID                   | bmjopen-2019-030208.R1                                                                                                                                                                                |
| Article Type:                   | Research                                                                                                                                                                                              |
| Date Submitted by the Author:   | 15-May-2019                                                                                                                                                                                           |
| Complete List of Authors:       | Lever Taylor, Billie ; University College London, Billings, Jo; UCL<br>Morant, Nicola; University College London<br>Bick, Debra; University of Warwick<br>Johnson, Sonia; UCL, Division of Psychiatry |
| <b>Primary Subject Heading</b>: | Mental health                                                                                                                                                                                         |
| Secondary Subject Heading:      | Qualitative research                                                                                                                                                                                  |
| Keywords:                       | MENTAL HEALTH, QUALITATIVE RESEARCH, Quality in health care < HEALTH SERVICES ADMINISTRATION & MANAGEMENT, Perinatal, Partners, Families                                                              |
|                                 |                                                                                                                                                                                                       |

SCHOLARONE™  
Manuscripts

1  
2  
3 **Title: Experiences of how services supporting women with perinatal mental health difficulties work with**  
4 **their families: A qualitative study in England**  
5  
6  
7  
8  
9

10 \*Billie Lever Taylor<sup>1</sup>, Jo Billings<sup>1</sup>, Nicola Morant<sup>1</sup>, Debra Bick<sup>2</sup>, Sonia Johnson<sup>1</sup>  
11

12 <sup>1</sup>Division of Psychiatry, University College London, Division of Psychiatry, Maple House, 149 Tottenham  
13 Court Road, London, W1T 7NF, UK.  
14

15 <sup>2</sup>Warwick Clinical Trials Unit, Warwick Medical School, University of Warwick, Gibbet Hill, CV4 7AL, UK.  
16

17 \*corresponding author: Billie Lever Taylor (e-mail: [billie.taylor@ucl.ac.uk](mailto:billie.taylor@ucl.ac.uk); tel: 020 3549 5971)  
18  
19

20 **Key words:** perinatal mental health; qualitative; partners; fathers; families  
21  
22

23  
24  
25 **Word count:** 9,300  
26  
27  
28  
29  
30  
31  
32  
33  
34  
35  
36  
37  
38  
39  
40  
41  
42  
43  
44  
45  
46  
47  
48  
49  
50  
51  
52  
53  
54  
55  
56  
57  
58  
59  
60

## Abstract

**Objectives:** Partners and wider family members play a vital role in relation to women's perinatal mental health, and clinical guidelines in the UK and internationally recommend that services supporting women with perinatal mental health difficulties involve and support their families too. However, little is known about family members' needs and experiences, or whether they feel included by mental health services. This study set out to explore this.

**Methods:** This research formed part of a wider study exploring experiences of perinatal mental health care in England. The broader study included semi-structured interviews with 52 women across England who received treatment for a perinatal mental health difficulty, and 32 family members identified by the women as offering them some support. Data from these 84 interviews relating to how services work with partners and families were extracted and analysed thematically.

**Results:** Analysis identified three overarching themes: 1) the centrality of women's families to their perinatal mental health/access to support; 2) experiences of partners and families being excluded by services; 3) ambivalence among women and their families about increasing family involvement/support. We found that partners and families appear to have an important influence on women's perinatal mental health, access to care, and interactions with services, but that services tend to focus on individual women (and babies) with little regard for their wider family context. The complexity of involving and supporting partners and families, coupled with anxiety about this among women and their families, reinforces the tendency to marginalise them.

**Conclusion:** Involving women's families and providing the support they need is challenging, but important. Experiences of women and their families of services treating perinatal mental health difficulties suggests greater focus is needed on overcoming barriers to family inclusion and on challenging underlying gender roles and expectations, rather than allowing these to shape and guide practice.



### Strengths and limitations of this study

- This study addressed a gap in the research literature, by interviewing women, their partners, and members of their wider family about their experiences of how services supporting women with perinatal mental health difficulties work with families.
- There is increasing policy emphasis on the need for mental health services to include and support families of perinatal women, but relatively little is known about how this is experienced in practice.
- This study included a large, diverse group of perinatal women and their family members with experience of a wide variety of mental health services, including mother and baby units, acute psychiatric wards, specialist perinatal community teams, and generic non-perinatal community teams.
- To our knowledge, this is the first published study to explore experiences of perinatal mental health care among wider family members as well as women's partners.
- It would have been useful to have explored clinician views of family involvement as well.

## Introduction

Mental health difficulties in the perinatal period (defined as pregnancy and the first year post-birth) are prevalent, affecting women as well as their partners and wider families, as families adjust to caring for a new baby. Research has shown that women's partners very often feel overwhelmed, lonely and frustrated when a woman experiences a perinatal mental health problem (1,2). Partners of women admitted to hospital with severe perinatal mental health difficulties report experiencing trauma, stress, fear, work-related difficulties and relationship problems (3,4). Almost one in five marriages ends following an episode of postpartum psychosis (5) and maternal postpartum depression is associated with *paternal* postpartum depression (6). While very little research has focused on women's extended families, one study found that - along with partners - siblings, parents and grandparents of women experiencing postnatal depression said the difficulties resulted in "a lot of worry within the family" (7). Research suggests there can be adverse outcomes for children too (8).

Partners and other family members also play a vital role in relation to women's perinatal mental health. Greater perceived support from a woman's partner or own mother is significantly correlated with lower rates of postnatal depression among first-time mothers (9), while having a supportive partner is strongly associated with shorter hospital stays among women with severe perinatal mental health difficulties (10). New mothers are also more likely to turn to their partners for support with their difficulties than to anyone else (11), while some are reluctant to access help because their partners dismiss their symptoms (12).

Best practice guidelines for perinatal mental health in the UK and internationally recommend including women's families in their care and supporting family members as well (13,14). Nevertheless, our recent systematic review and meta-synthesis found that, across a range of countries, partners of women with perinatal mental health difficulties reported feeling marginalised by services and confronted by a largely mother-baby-oriented environment (15). Our meta-synthesis also identified ambivalence on the part of women's partners about seeking greater support and involvement. These findings appeared to be connected to wider social trends: it has been argued that, although fathers increasingly aspire to be more 'involved' in the perinatal period and beyond, societal pressures and norms continue to relegate them to the periphery, while persisting beliefs about masculinity and fatherhood discourage them from seeking support for themselves (16). Meanwhile, women are seen as 'natural' nurturers, with emphasis placed on the importance of the mother-infant relationship, and with mothers viewed as holding primary responsibility for the emotional health of the infant (17)

1  
2  
3 Despite these insights, the studies identified by the systematic review had important limitations. In particular,  
4 many only touched briefly on partners' experiences of services, as part of a wider remit, and it was not always  
5 clear to which services or professionals the findings referred. Additionally, no studies were found that  
6 investigated views of services among family members other than partners. Given the increasing recognition that  
7 services treating perinatal mental health difficulties need to "think family" (18), further research into partner and  
8 family experiences is needed and may provide useful insights for clinical practice.

9  
10 The present study therefore sought to expand on previous research by exploring the role of partners and wider  
11 families in relation to women's perinatal mental health and access to services and experiences of family  
12 inclusion by services supporting women with perinatal mental health difficulties. Women's views were included  
13 along with those of their partners and wider families to allow different perspectives to be considered.

## 23 **Methods**

24  
25 This study was part of a wider research programme exploring the effectiveness of services treating perinatal  
26 mental health difficulties. As part of this research programme qualitative, semi-structured interviews were  
27 conducted with 52 women who had accessed National Health Service (NHS) treatment for a variety of perinatal  
28 mental health difficulties, and 32 of their partners/family members. These interviews explored participants'  
29 views and experiences of a wide range of mental health service(s). The current study focused on analysing those  
30 sections of the interviews relating specifically to experiences of how services worked with partners and families.  
31 NHS ethics approval was obtained (reference: 13/LO/1855).

## 39 **Recruitment**

40  
41 **Women:** Women were recruited from eleven NHS healthcare providers, across different areas of England,  
42 which varied in their urbanicity. Women were purposively sampled to obtain diversity of diagnosis, service use,  
43 and socio-demographic background. Inclusion criteria required that women were 16 years or over; English  
44 language speakers; had accessed NHS treatment for a perinatal mental health difficulty (during or after their  
45 most recent pregnancy); and had a baby aged 6-9 months old. Eligible women were identified and approached  
46 by a clinician within their mental health team. Those expressing an interest in participating were contacted by a  
47 researcher to provide them with more information about the study and obtain informed written consent if they  
48 were willing to take part. It was not possible to determine how many women refused participation as researchers  
49 were only informed of those who were interested.

1  
2  
3 **Family members:** As previously stated, for each participating woman, a partner or other family member was  
4 also interviewed wherever possible. Women were asked if they were able/willing to identify a family member,  
5 with some involvement in supporting them, and ask them if they might be willing to take part too (although  
6 women could still participate even if no one from their family could be interviewed). A researcher got in touch  
7 with family members who were potentially willing to provide them with more information about the study.  
8 Informed written consent was obtained from all participating family members. Inclusion criteria required that  
9 participating family members were: 16 years or over; English language speakers; and were the partner/family  
10 member of a participating woman with some involvement in supporting her.  
11  
12

### 13 **Data collection**

14  
15 Interviews took place between June 2015 and March 2017, usually in participants' homes. Participants were  
16 asked, in semi-structured interviews lasting around an hour in total, about their views and experiences of all the  
17 services women had accessed for their perinatal mental health. As outlined, the current study focuses  
18 specifically on the interview sections relating to partner/family involvement. Specifically, women were asked:  
19 *Can you describe how services and professionals worked with other people who were supporting you and your*  
20 *baby (e.g. your partner, baby's father, family members, or friends)?* Partners/family members were asked: *What*  
21 *has been your role in supporting [mother] through this period? Can you describe how involved you have felt in*  
22 *[mother's] support and treatment? Can you describe any support you've received from services or professionals*  
23 *as someone supporting a mother who is having difficulties?* Follow-up probes to these main questions were used  
24 as appropriate to encourage participants to give full accounts of their experiences. Given the qualitative nature  
25 of the study, related issues were sometimes also touched on elsewhere in their interviews and were included in  
26 the analysis where relevant. Participants were informed that their contributions would be kept confidential with  
27 identifying details removed, but that the researcher would pass on information if he/she had major concerns  
28 about their safety or that of others; ultimately concerns were passed to social services in relation to information  
29 provided by one woman (with her permission).  
30  
31

32  
33 Interviews with women were carried out separately to family members, with a few exceptions. Most interviews  
34 (n=70) were conducted by the first author, who is a clinical psychologist, researcher and mother. A small  
35 number (n=14) were also carried out by: a professor of social work; a member of the study's perinatal service  
36 user and carer advisory group; and two MSc students studying clinical mental health sciences.  
37  
38  
39  
40  
41  
42  
43  
44  
45  
46  
47  
48  
49  
50  
51  
52  
53  
54  
55  
56  
57  
58  
59  
60

## Analysis

Interviews were audio-recorded, transcribed and anonymised. Researcher notes were also written up after each interview. In two cases, interviews were accidentally not recorded and researcher notes were analysed instead. Thematic analysis was used (19), with themes and subthemes identified in a cyclical process of reading, coding and exploring patterns in the data. To enhance validity, a second researcher independently coded nine interviews with women and seven with family members, with consensus reached on the coding frame through discussion. Analysis was facilitated by using NVivo qualitative analysis software. Given the large number of interviews, two separate datasets were created; one for women and one for family members. Participants in each dataset were also categorised by the type(s) of service women accessed. Contrasts were explored across participant groups and services: several key themes were universally reported across different groups but findings unique to types of participant (e.g. male partners) or service (e.g. MBUs) were also identified.

## Patient and public involvement

Interview guides were developed by the research team and reviewed and amended by a perinatal service user and carer advisory group (with experience of perinatal mental health care). Pilot interviews were carried out with one woman and one partner from this group, and then with four other women who had accessed perinatal mental health support, and two of their partners/relatives. The latter six interviews were included in the final sample since they met study eligibility criteria and only minor changes to the interview schedules were needed (e.g. to reduce the number of probes and expand the opening/introductory text). Five of the main study interviews were then carried out by a woman from the advisory group, and another woman from this group, along with two partners, also reviewed the manuscript which was edited based on their feedback.

## Results

### Characteristics of participants and services accessed

Tables 1 and 2 show participants' characteristics. Women had a range of diagnoses including depression, psychotic disorders, personality disorder, and anxiety disorders. Their mean age was 32 years (range: 19-43) and around two thirds were living with a partner.

Just over two thirds of participating family members were women's partners (one female, the others male), while around a fifth were parents of participating women (referred to as 'grandparents'). The mean age of

women's partners was 34 years (range: 23-48), while for grandparents it was 54 years (range: 39-67) (the young age of grandparents may reflect the fact that they were often the chosen source of support for the younger and single mothers included).

**Table 1.** Key characteristics of participating women (N=52)

| Characteristics                                         | Category                            | Respondents (n; %)        |
|---------------------------------------------------------|-------------------------------------|---------------------------|
| Primary diagnosis                                       | Depression                          | 19 (37%)                  |
|                                                         | Psychosis/bipolar/schizophrenia     | 13 (25%)                  |
|                                                         | Personality disorder                | 11 (21%)                  |
|                                                         | Anxiety                             | 9 (17%)                   |
| Service used<br>(women could use more than one service) | Perinatal                           |                           |
|                                                         | MBU                                 | 10 (19%)                  |
|                                                         | Specialist perinatal community team | 18 (35%)                  |
|                                                         | Specialist health visitors/midwives | 12 (23%)                  |
|                                                         | Non-perinatal                       |                           |
|                                                         | General acute ward/crisis house     | 11 (21%)                  |
|                                                         | Crisis resolution team              | 17 (33%)                  |
|                                                         | Community mental health team        | 15 (29%)                  |
| Previous service use for mental health                  | Talking therapy service             | 10 (19%)                  |
|                                                         | Early intervention in psychosis     | 3 (6%)                    |
| Age                                                     | Yes                                 | 42 (81%)                  |
|                                                         | No                                  | 10 (19%)                  |
| Ethnicity                                               | Mean age                            | 32 yrs (range: 19-43 yrs) |
|                                                         | < 25 years                          | 6 (12%)                   |
|                                                         | 25 - 29 years                       | 12 (23%)                  |
|                                                         | 30 - 39                             | 29 (56%)                  |
|                                                         | > 39 years                          | 5 (10%)                   |
| Work status                                             | White British                       | 28 (54%)                  |
|                                                         | White Other                         | 6 (12%)                   |
|                                                         | Black Caribbean                     | 5 (10%)                   |
|                                                         | Black African                       | 4 (8%)                    |
|                                                         | Black other                         | 2 (4%)                    |
|                                                         | Asian                               | 4 (8%)                    |
|                                                         | Arab                                | 1 (2%)                    |
| Level of education                                      | Mixed Race                          | 2 (4%)                    |
|                                                         | Employed full-time                  | 1 (2%)                    |
|                                                         | Self-employed part-time             | 2 (4%)                    |
|                                                         | Maternity leave                     | 22 (42%)                  |
|                                                         | Unemployed/homemaker                | 23 (44%)                  |
| Living with partner                                     | Unable to work due to illness       | 4 (8%)                    |
|                                                         | No formal qualifications            | 8 (15%)                   |
|                                                         | Secondary leaving qualifications    | 22 (42%)                  |
|                                                         | Undergraduate degree                | 10 (19%)                  |
| Number of children                                      | Postgraduate degree                 | 12 (23%)                  |
|                                                         | Yes                                 | 35 (67%)                  |
|                                                         | No                                  | 17 (33%)                  |
| Custody status                                          | 1                                   | 26 (50%)                  |
|                                                         | 2                                   | 13 (25%)                  |
|                                                         | 3+                                  | 13 (25%)                  |
| Custody status                                          | Retained custody of baby            | 47 (90%)                  |
|                                                         | Not in custody of baby              | 5 (10%)                   |

**Table 2.** Key characteristics of participating family members (N=32)

| Characteristics        | Category                           | Respondents (n; %)        |
|------------------------|------------------------------------|---------------------------|
| Relationship to mother | Husband/partner                    | 22 (69%)                  |
|                        | Mother/father ('grandparent')      | 7 (22%)                   |
|                        | Other relative (e.g. sister/child) | 3 (9%)                    |
| Age                    | Mean age (partners)                | 34 yrs (range: 23-48 yrs) |
|                        | Mean age (grandparents)            | 54 yrs (range: 39-67 yrs) |
|                        | Mean age (other relatives)         | 21 yrs (range: 17-24 yrs) |
|                        | < 25 years                         | 4 (13%)                   |
|                        | 25 - 29 years                      | 8 (25%)                   |
|                        | 30 - 39                            | 10 (31%)                  |
| Ethnicity              | > 39 years                         | 10 (31%)                  |
|                        | White British                      | 19 (59%)                  |
|                        | White Other                        | 6 (19%)                   |
|                        | Black Caribbean                    | 2 (6%)                    |
|                        | Black African                      | 2 (6%)                    |
| Living with mother     | Asian                              | 3 (9%)                    |
|                        | Yes                                | 26 (81%)                  |
| Work status            | No                                 | 6 (19%)                   |
|                        | Employed full-time                 | 15 (47%)                  |
|                        | Employed part-time                 | 1 (3%)                    |
|                        | Self-employed full-time            | 4 (13%)                   |
|                        | Self-employed part-time            | 1 (3%)                    |
|                        | Student                            | 3 (9%)                    |
|                        | Unemployed/retired/carer           | 8 (25%)                   |
| Level of education     | No formal qualifications           | 1 (3%)                    |
|                        | Secondary leaving qualifications   | 19 (59%)                  |
|                        | Undergraduate degree               | 6 (19%)                   |
|                        | Postgraduate degree                | 5 (16%)                   |
|                        | Not recorded                       | 1 (3%)                    |

The mental health services which women had accessed, and on which participants thus based their experiences, were diverse. Details of the main services participants described are given in Table 3. Some women (with a range of diagnoses) were admitted with their babies to specialist mother and baby units (MBUs), while others were separated from their babies, as they were admitted to general psychiatric wards with no provision for infant care. In the community, some women were treated by specialist secondary care perinatal mental health services (for a range of moderate to severe difficulties), or by specially trained mental health midwives or health visitors (for milder difficulties). Others received support from generic, non-perinatal mental health services such as crisis teams (for acute difficulties), multi-disciplinary community mental health teams (for moderate to severe difficulties), or services offering talking therapies, usually cognitive-behavioural based (for milder difficulties). Some women also received support from non-perinatal services specialising in particular diagnoses (e.g. early intervention in psychosis services). Many women accessed more than one service.

**Table 3.** Description of key services included

| Specialist perinatal or non-perinatal service | Type of service                                   | Brief description                                                                                                                 |
|-----------------------------------------------|---------------------------------------------------|-----------------------------------------------------------------------------------------------------------------------------------|
| Specialist perinatal                          | Mother and Baby Unit (MBU)                        | Specialist hospital where women with acute mental health difficulties are admitted together with their babies                     |
|                                               | Specialist perinatal community mental health team | Multidisciplinary teams treating women in the community with moderate to severe perinatal mental health difficulties              |
|                                               | Specialist health visitors/midwives               | Health visitors and midwives with additional training to offer support to women with mental health difficulties                   |
| Non-perinatal                                 | General acute psychiatric ward                    | General psychiatric hospitals for adults with mental health difficulties where women can be admitted (without their babies)       |
|                                               | Crisis resolution team                            | Generic multidisciplinary teams offering short-term intensive home treatment to people experiencing an acute mental health crisis |
|                                               | Early intervention in psychosis service           | Multidisciplinary teams offering long-term, intensive support to people experiencing a first episode of psychosis                 |
|                                               | Community mental health team                      | Generic multidisciplinary teams treating adults with moderate to severe mental health difficulties                                |
|                                               | Talking therapy services                          | Generic community services offering brief psychological therapy for anxiety and depression                                        |

## Overview of themes

Three overarching themes were identified in the analysis: 1) the centrality of women's families to their perinatal mental health and access to support; 2) experiences of partners and families being excluded by services; 3) ambivalence among women and family members about increasing family involvement/support. Table 4 shows sub-themes for these, each of which is presented and elaborated on in the text below. Given the large and diverse samples included in this study, supplementary files 1 and 2 provide an overview of how participants' views and experiences vary in relation to different types of mental health services (supplementary file 1), and in relation to their status as direct service users (women with perinatal mental health difficulties), partners, or wider family members (supplementary file 2). Overall, women, their partners, and wider family members considered families were marginalised by services and should be better included and supported. But they also



described some unique anxieties about this. While all types of mental health service were reported to marginalise families, MBUs were seen as the most inclusive.

**Table 4. Themes and sub-themes identified**

| Themes                                                                                | Sub-themes                                                                                                                                                                                                                                                  |
|---------------------------------------------------------------------------------------|-------------------------------------------------------------------------------------------------------------------------------------------------------------------------------------------------------------------------------------------------------------|
| Centrality of women's families to their perinatal mental health and access to support | The role of interpersonal transition and conflict<br>Influence of the family on support and recovery                                                                                                                                                        |
| Experiences of partners and families being excluded by services                       | Overlooking families<br>Lack of support for partners and other family members<br>Difficulties balancing women's and family members' needs<br>Services ill-equipped for complexity of family involvement<br>Structure of services and separation of families |
| Ambivalence about increasing family involvement/support                               | Feared consequences of family inclusion/support<br>Partners and other family members have to 'stay strong'                                                                                                                                                  |

## 1. The centrality of the family to perinatal mental health and access to support

A key finding expressed by women, partners and other family members centred on the importance of women's families to their difficulties, interactions with services, and longer-term recovery. This view was expressed irrespective of diagnosis, with findings indicating that a woman's mental health needs should be addressed with reference to her family and interpersonal context.

### 1.1 The role of interpersonal transition and conflict

Women and their family members described pregnancy and having a baby as a major life transition: it resulted in shifts in their roles, relationships and identities, and this could provoke distress. Though the adjustment could be particularly marked for first-time parents, the addition of further children could also disrupt the status quo.

It was conspicuous how frequently participants linked interpersonal conflict and tension to the woman's difficulties. Women, in particular, often cited discord with their partner or wider family as contributing to, or exacerbating their mental health difficulties. Several described their relationships with partners, as well as with wider family members and friends as having broken down during pregnancy or after giving birth, often leaving

1  
2  
3 them struggling to live up to their image of the 'perfect' mother, and to cope with their babies singlehandedly.  
4  
5 Other women felt frustrated and overburdened, saying their partners did not help enough with the new baby, or  
6  
7 did not really understand how difficult motherhood was.  
8

9  
10 When I first told [my husband] about my depression...he just didn't get it. And it's almost like  
11  
12 anything I say is an attack on him...or 'Oh, well, if you're feeling depressed, imagine how I'm  
13  
14 feeling, you know, trying to work and pay the rent'...So I always feel like I can't tell him my  
15  
16 problems because they're just so irrelevant...And he's self-employed, so if I do want to go out or  
17  
18 something...he's like, 'I can't be turning work down.'...I've not gone out in the evenings since  
19  
20 having the baby...He said, 'Oh, we've had so many problems since the baby was born'...She's  
21  
22 nearly torn us apart.

23 Mother 37

24  
25 Some participants, most commonly women's partners, expressed the view that family relations had become  
26  
27 strained as a result of the woman's mental health difficulties, rather than vice-versa - for example saying they  
28  
29 believed women became difficult, or even suspicious and hostile towards their families, because of postnatal  
30  
31 depression or psychotic delusions. In some cases, women's partners also felt rejected or deprioritised by them  
32  
33 after the birth of the baby, prompting clashes and distress.  
34

35  
36 I've had my own challenges as well with the change in our lives...If I was on [my wife's] list  
37  
38 before, I'm- I was at the bottom of the list, I'm now not on the list...

39  
40 You don't have an adult relationship in the same way that you did...You know, I come in from work  
41  
42 and [my wife] wants to get to bed early if she's tired. So you have those sort of like clashes really.

43 Partner 4

44  
45  
46 These turbulent relationship shifts were not confined only to women and their partners. Sometimes grandparents  
47  
48 or, less frequently, other relatives were also heavily involved (e.g. where women's relationships with their  
49  
50 partners had broken down) and, in such cases, the birth of a baby often necessitated a reorganisation of wider  
51  
52 family relations too. For example, one single mother was living with her father and he associated her difficulties  
53  
54 partly with their own shifting relationship in the context of a new baby.

55  
56 I know that at the moment [my daughter's] suffering with a bit of postnatal depression...I know  
57  
58 because she has screaming rows...  
59  
60

1  
2  
3 When we argue about stuff, the crux of the argument, when we're sort of nose to nose is, 'I'm not  
4 your bloody boyfriend and I'm not his dad. You don't get to-, if I was his dad you could talk to me  
5 like that...But I'm not, I'm your dad.' And from [my daughter's] point of view it's like, 'I'm raising  
6 this baby on my own'...That kicks me right in the teeth because it's like, 'I'm here.'

7  
8  
9  
10  
11 Grandparent 3  
12

13 Overall, although it was the women who had been given the diagnosis of a perinatal mental health problem,  
14 their difficulties were frequently embedded within a complex and fraught wider interpersonal context, where the  
15 whole family was struggling.  
16  
17

## 18 19 20 **1.2 Influence of the family on support and recovery** 21

22  
23 Women's contact with mental health services took place in the context of the complex, shifting family dynamics  
24 described. It was clear that family circumstances, and the attitudes and behaviours of family members,  
25 influenced women's access to support, interactions with services, and recovery. Women who had some of the  
26 'worst' outcomes (e.g. the five women who had lost custody of their babies) were typically living in particularly  
27 challenging family contexts, categorised by conflict, relationship breakdown, and sometimes violence and abuse  
28 from partners or other family members. When women perceived their families to be unsupportive or dismissive  
29 of their struggles, it could increase or prolong their distress.  
30  
31  
32  
33  
34  
35

36  
37 [My husband] was like... 'You're not the woman I thought you were. This behaviour is just awful.  
38 You're not loving the children.' And it just wasn't working. And then eventually it got worse, I  
39 think I, within two weeks anyway I was like completely suicidal.  
40  
41

42  
43 Mother 11  
44

45 In a few cases, partners or other family members put pressure on women not to access support. This could be  
46 because they were anxious about women taking medication, or feared professionals might judge the family  
47 negatively, or even take the baby away. In some cases, women turned down treatment because of perceived  
48 family resistance; in other cases they kept their treatment secret. This could be especially sensitive for women  
49 from ethnic minority backgrounds, who sometimes reported that perceived stigma around mental health within  
50 their wider family and social networks resulted in them hiding their difficulties and treatment from their  
51 families.  
52  
53  
54  
55  
56  
57  
58  
59  
60

1  
2  
3 On the other hand, there were numerous instances where partners and other family members were supportive of  
4 women's treatment and recovery. They were often seen (by women in particular) as instrumental in identifying  
5 women's difficulties, encouraging them to get help, and assisting their recovery, with some family members  
6 describing their relief when women accessed support. Women with proactive family members supporting and  
7 advocating for them seemed to get access to professional support more readily than those without.  
8  
9

10  
11  
12  
13 Furthermore, when women struggled, their partners and wider families frequently took over household chores or  
14 helped more with the baby, for example doing night feeds or looking after the baby while the woman attended  
15 appointments or was hospitalised. Women from some cultural backgrounds (e.g. Asian) sometimes reported that  
16 a high level of involvement with infant care from extended family networks was the norm. For other families,  
17 taking on extra responsibilities could put a strain on partners and wider families as well and, in some cases, they  
18 also blamed themselves for what had happened.  
19  
20  
21  
22  
23

24  
25  
26 It made me realise that when I had my first two my mum, bless her, she used to have [my baby]  
27 every weekend, so I could get sleep because he never slept. But it made such a difference. And not  
28 having her this time, I think that's a big cause of postnatal depression nowadays, is that families  
29 don't live near each other.  
30  
31  
32

33 Mother 31  
34  
35

36 As a man, or partner, husband, you feel like it's your fault your partner is the way that they  
37 are... Maybe I've not loved her enough. Maybe I've not helped enough. But really, in essence,  
38 you're probably doing as much as you can, or doing more than what you normally do... I blamed  
39 myself a little bit, not just for, you know, the pregnancy and the baby, but just, I don't know,  
40 everything really.  
41  
42  
43  
44  
45

46 Partner 15  
47  
48  
49  
50

## 51 **2. Experiences of partners and wider families being excluded by services**

52  
53

54 Despite their perceived importance, many of those interviewed believed families were excluded by services  
55 supporting women with perinatal mental health difficulties. Experiences of this were reported by women,  
56 partners and wider family members across different demographics, diagnoses and service types, although MBUs  
57 appeared to be more inclusive of families than other services. Analysis suggested that this exclusion of families  
58  
59  
60

1  
2  
3 was manifested in various ways including: not being invited to or included in appointments; not being provided  
4 with information about, or helped to understand, the mother's mental health problems; not being involved in  
5 treatment decisions; their own distress and difficulties not being acknowledged; and not being offered any  
6 support for these difficulties.  
7  
8  
9

## 10 11 **2.1 Overlooking families** 12

13  
14 It was common for women and their family members to say that professionals overlooked partners and wider  
15 families, focusing their attention exclusively on women and their babies. Mirroring this, some participants  
16 conceded that they too had given little thought to family involvement - e.g. not thinking to ask if family  
17 members could attend appointments/access support themselves - even if, in hindsight, women and their family  
18 members alike thought this could have been valuable.  
19  
20  
21  
22  
23

24 Within community mental health services in particular (both specialist perinatal services and generic, non-  
25 perinatal services) there were sometimes few opportunities for family members to become involved or meet  
26 clinicians (e.g. where they weren't invited to appointments), and a sense that there was no real "place for, like, a  
27 husband" (partner 15). As a result, women's families often felt poorly informed about their difficulties and  
28 treatment; they were unsure exactly what support a woman was receiving, what to expect, and how best to help  
29 her.  
30  
31  
32  
33  
34  
35

36  
37 I wing it every day with supporting [my partner], so I don't know the correct way... There's been no  
38 support there to help me. I feel sometimes the best way for me to support [her] is just agree with her  
39 and deal with it after... But I don't know whether that's the right way to go about it overall. She's  
40 got a [specialist perinatal] psychiatrist. What about support for the dad in this case?  
41  
42  
43  
44

45 Partner 9  
46

47 A number of women and their family members wanted families to be included in at least some appointments;  
48 they felt this would both allow them to contribute their own observations, and also help them better understand  
49 and support women.  
50  
51

52  
53 It would've been nice to have had a bit more involvement [with the talking therapy] as far as, you  
54 know, meetings or otherwise just so that I have a better grasp to understand what issues we're  
55 dealing with... I guess I didn't know, within the structure of how everything works, how I could get  
56 involved.  
57  
58  
59  
60

Partner 5

[My husband] wanted to speak to professionals to tell them his side...I would [have liked that too], just to see, you know, because he's not like the easiest of men, but then he's not responded in a way that I needed him to respond...And he's never ever approached me in a way he needs to approach me, so it makes me worse.

Mother 50

When mental health professionals visited women at home, family members really valued being included and asked for their input. But some felt they were ignored.

I've never really talked to [the early intervention service care coordinator]...Like she comes here and talks to [my partner]. Doesn't really say much to me or doesn't ask me, 'How do you think she is?', or things like that. I mean nothing...It would have been nice for her to say, 'Well I'll involve you in some of the meetings.' But you don't get nothing.

Partner 11

Where women were admitted to MBUs or psychiatric wards, their families were more likely to have at least some contact with clinicians on inpatient units. For example, they might speak to them when visiting women or arranging visits, and some were involved in treatment decisions if women were judged to lack capacity. MBUs were praised overall for working collaboratively with women's families, regularly communicating with them, as well as inviting them to be present at ward rounds and taking their views into account. By contrast, family members had to be proactive and persistent to get staff on general psychiatric wards to keep them updated on the woman's condition and treatment plan. A few women said staff on acute wards treated them like "a single person" (mother 44), hardly acknowledging their families, and sometimes not even realising they had a new baby. One man, whose partner stayed on both an MBU and an acute ward, described the MBU as more inclusive of him than the acute ward.

Two or three days go and then I would call [the ward] again because they never, well they hardly ever called me. It was me trying to find out things all the time.

I was asked to attend [meetings at the MBU] if I wanted to. You know, they wanted me to attend to see...It was run like with partners in mind. They wanted the partners to be involved and to, you know, to help in the whole process.

Partner 14

## 2.2 Lack of support for partners and other family members

As well as wanting information about and involvement in women's support, some partners and family members said they would have valued emotional support from mental health professionals themselves, for their own distress; they wanted help coping with the effects of the woman's mental health problems on them, and addressing their own difficulties adjusting to life with a new baby. Across our data corpus and regardless of community, inpatient, perinatal or non-perinatal mental health settings, few accounts were provided of support targeted at family members.

In general, families wanted support to be offered face-to-face or over the telephone, and in particular described wanting professionals to acknowledge how difficult things were for them, and check how they were doing.

Several partners and other family members felt that nobody was thinking about them.

I think it would have been nice if somebody was there to just call me occasionally saying, 'How are you doing?'...I don't want any sort of physical help from anyone but just talking to someone and saying, 'You know, let's have a cup of tea, we'll come and see you just to see how things are going.' That itself would have been great, but I wasn't given any of that [by the community mental health team]. No, not at all.

Grandmother 6

I felt I wasn't being more involved, like, and no one's coming to me, like, 'How are you doing? How is your mental health state?' And all this, you know. Because it's not easy. And I get a bit, like, okay. No one's asking me how I am. How about me? I thought, it's not only her going through this, it's me. I'm there and all.

Partner 7

There were a few exceptions where professionals, most commonly perinatal specialists on MBUs or in the community, had acknowledged family members' needs and engaged with them too, and when this happened it was valued.

[I had] lots of, just informal chats...Different members of the [MBU] staff would ask me how I'm coping, am I alright? How are things at home? And sometimes I sort of took up the offer to sit and have a bit more of a chat.

Partner 12

However, even when support had been offered, it was frequently viewed as superficial, insufficient or too late.

I was offered support [after my wife's MBU admission], but it was all sort of quite late on in the process. And kind of, ultimately, you had a meeting with someone at home. They were very nice.

But none of the things that were due to be followed up on were followed up on.

Partner 17

### 2.3 Difficulties balancing the needs of women and their family members

In some cases, rather than simply overlooking partners and wider families, respondents' accounts suggested that clinicians may have excluded partners or family members because of concerns that involving them could reduce the focus on the needs of the woman (and baby), or because they were mindful of the need to protect women's potential desire for confidentiality from their families. These issues were complex; as outlined, some women kept aspects of their mental health or treatment secret from their families, while others described experiencing turbulent, unequal and sometimes coercive and abusive relationships, meaning privacy and time alone with professionals could be vital. Prioritising the needs of women and babies, and keeping a clear focus on them, seemed essential in this context. Yet it could also leave family members feeling shut out. Several family members, across different types of service, described how they had wanted to put across their own opinions (e.g. if they felt a woman was struggling more than she admitted, or wanted to tell professionals that a woman's hostility towards them was, in their view, really driven by paranoia, psychosis or similar). But they felt mental health professionals were unwilling to speak to them or appeared cautious or mistrustful of them (occasionally also linking this to the female-dominated nature of staff within both perinatal and non-perinatal mental health services).

I wanted to say to the [specialist] health visitor, 'Look maybe do you think that this could be postnatal depression...?' I would have liked the chance to discuss it with her. Not that I wanted to encroach on any of [my daughter's] time with her...But alas...If I was in the room then everything sort of stopped until I left the room, and then they recommenced...The minute I walked in it was like tumbleweed.

Grandparent 3

For their part, some women who desired privacy from their families had still wanted them involved in some



1  
2  
3 way. For example, one woman from an ethnic minority background saw value in involving her husband in her  
4 care, but at the same time kept some details of her difficulties secret from him due to perceived cultural stigma  
5 around mental health. She wished professionals had helped her negotiate this, offering her more options for how  
6 he might be included given this context.  
7  
8  
9

10  
11 [The community team] haven't told me, 'How would you like us to involve [your husband]?' They  
12 just told me to bring him to my appointments. But I don't want to bring him to my appointments  
13 because they might bring up something that he doesn't know and then that would just cause  
14 problems afterwards...[I'd like to] take him along with me [so he could get] some sort of  
15 understanding... But like I said, it's either come to my appointments or don't get involved.  
16  
17  
18  
19  
20  
21

22 Mother 35

23  
24 However, adding to the complexity, a few participants said that too much emphasis on involving partners or  
25 family members could leave women themselves marginalised. This suggested that professionals at times  
26 experienced difficulties determining the appropriate emphasis to place on different people's needs or  
27 perspectives – especially where interpersonal relationships were strained.  
28  
29  
30  
31

32  
33 When you're in hospital, they hardly listen to you. Well, this is my experience, my feeling. That, it's  
34 like they hardly listen to you at all because they know the reason you're in hospital is because  
35 you're unwell. So they listen to [my husband].  
36  
37  
38

39 Mother 26

40  
41 [Her ex-partner would] just have to click his fingers and people would be like, 'Oh okay we'll  
42 change it, we'll change meetings, we'll change times, we'll give you what you want all the  
43 time'...But [the mother is] not allowed to kick up a fuss about it.  
44  
45  
46  
47

48 Relative 2

49  
50 Nevertheless, there were a small number of examples that suggested it was possible to protect women's needs  
51 without excluding their families, even in difficult circumstances. These were usually cases where professionals  
52 had built up a good picture of the family context, for example in non-perinatal mental health teams which had  
53 been involved longer-term, not only during the perinatal period. For example, the partner of one woman (who  
54 had a pre-existing diagnosis of bipolar disorder and experienced postpartum psychosis) described how, although  
55 he initially felt marginalised by community mental health team clinicians, he felt they had got to know the  
56  
57  
58  
59  
60

1  
2  
3 family situation better over time, and became more adept at meeting both his and his wife's needs.  
4

5  
6 It's been a very fine line to tread for them and they've done it very well...Not making me feel  
7  
8 excluded...Not using confidentiality as a rather convenient way of just not having to deal with  
9  
10 me...But finding sensitive and appropriate you know, professionally appropriate ways around that  
11  
12 so that they get the information they need from me...And that I still feel supported.

13  
14  
15  
16  
17  
18  
19  
20  
21  
22  
23  
24  
25  
26  
27  
28  
29  
30  
31  
32  
33  
34  
35  
36  
37  
38  
39  
40  
41  
42  
43  
44  
45  
46  
47  
48  
49  
50  
51  
52  
53  
54  
55  
56  
57  
58  
59  
60  
Partner 12

## 2.4 Services ill-equipped for complexity of family inclusion

As the findings above suggest, complex interpersonal dynamics between women and their families meant family involvement was not always straightforward. There were indications that mental health professionals at times felt ill-equipped or under-resourced to deal with this complexity, marginalising family members as a result. For example, in one case, a woman believed her perinatal nurse excluded her partner from appointments because she did not feel suitably trained to deal with the tensions in their relationship. Nobody else, she said, was able to support her partner or see them together either.

I'm just, basically like, surprised that there is no support system for carers, or friends, or partners, or family members, there's no support system whatsoever...

[My perinatal mental health nurse] doesn't want to make it worse. It's like a very different, couples therapy, like dealing with two people in the same room who've got conflict with each other, it's a very different thing, yes. And like, so I think, I don't know how many years of training it is, but like, she doesn't have that training, she can't do it, yes.

Mother 8

There were a few exceptions, where participants described practitioners, most often specialist perinatal practitioners, as engaging confidently with the family context; this was appreciated.

[My perinatal mental health nurse] was meeting with my boyfriend as well at the same time and he was trying, you know, to help us with the, you know, relationship thing and what is happening and stuff. No, he was very, very good.

Mother 1

Yet in other cases, partners and family members believed professionals excluded them because their perspectives could be awkward or difficult.

1  
2  
3 I'm quite happy to go in there and say to them, 'I don't like the way you're doing this' or, 'I don't  
4 think it's right what you're doing' or, 'you shouldn't be doing it.' And I don't think they liked  
5 it...And I just think it's because, a bit of bad blood between us that they just distanced their self  
6 away.  
7  
8  
9

10  
11 Grandmother 5  
12

13 Where wider families were involved, in particular when grandparents were helping single mothers, they  
14 sometimes also felt that professionals were ill-equipped to consider their unique role and needs. Likewise, in  
15 unconventional family set-ups, family members could feel poorly accommodated, for example where women  
16 had new partners who weren't the baby's biological father.  
17  
18  
19

20  
21 It's a grandad's role... You're looked at from the outside world, from doctors and health  
22 professionals and psychiatric healthcare professionals as a dad in that situation... Because the  
23 dynamic of families has changed, the dynamic of the help that is offered to them should be changed.  
24  
25  
26

27  
28 Grandparent 3  
29

## 30 31 **2.5 The structure of services and separation of families** 32

33 Finally, broader structural issues were sometimes referred to in relation to how and why partners and families  
34 were marginalised from services. In particular, participants noted that inpatient admissions involved separating  
35 family members from each other, often meaning that partners or relatives cared for babies (or older children)  
36 single-handedly while women were hospitalised. While women and their families generally preferred specialist  
37 MBU admissions with their babies over acute ward admissions without them, a disadvantage was that family  
38 members were separated not only from women but also from babies. Although MBUs were perceived as  
39 collaborating better with women's families than other services, some family members felt their set-up made it  
40 difficult for families to fit in, and that the consequences for them of the separation were not fully acknowledged.  
41  
42  
43  
44  
45  
46  
47

48  
49 The only thing that could have been improved on from my perspective was a bit more recognition  
50 from the, the nursery nurses... I'm not resident [on the MBU], I haven't got my stuff there. It's, it  
51 can be quite tricky to suddenly slot into your father role... Not having had a chance to get to know  
52 your baby very much.  
53  
54  
55  
56

57 Partner 12  
58  
59  
60

1  
2  
3 A scarcity of MBUs nationwide, and the wide areas they served, also meant women were regularly admitted to  
4 facilities far from home, meaning their families often faced long journeys to visit them, with little or no financial  
5 support for travel. Nonetheless, MBUs were seen as accommodating family visits well. This contrasted with  
6 acute wards, where experiences of visiting were less positive.  
7  
8  
9

10  
11 You can hear shouting, you can hear screaming...It would be nice to have had a family room away  
12 from the ward...You want to take your child for a walk in the gardens...No. You had to be stuck in  
13 that room. Like I say, it felt like a prison.  
14  
15  
16

17 Partner 21

18  
19  
20 Family members also wanted more support from both MBUs and acute wards post-discharge, to help them  
21 readjust to life back at home with a new baby and to cope with any ongoing difficulties. Some felt that a lack of  
22 focus on women's wider family contexts meant women were sent home to the same turbulent dynamics in  
23 which their difficulties first arose, resulting in them struggling again.  
24  
25  
26

27  
28 Everything was just put in place with [my daughter]. So there was no following up for me...But if I  
29 got the support...how to help [my daughter]...you know, how to hold her little family together, I  
30 think that would've been so much better. If [the MBU] did something with the parents or  
31 grandparents...because she was coming right back home...so if the support is not there for her...We  
32 didn't hope that [she] would go back in hospital again, but it happened.  
33  
34  
35  
36  
37

38 Grandparent 2

39  
40  
41 In community settings, structural factors could also contribute to marginalising families. This could occur when  
42 women were seen individually in clinics rather than in their home environment, when family members were  
43 invited to appointments but could not attend because they were during working hours, or where support for  
44 family members was offered at inconvenient times and in awkward locations.  
45  
46  
47

48  
49 Professionals don't work at weekends. It's a Monday to Friday profession...They're telling me I  
50 have to take time off during the week to get the support we need but I'm saying, why don't you  
51 work a weekend so we can get the support that we need?  
52  
53  
54

55 Partner 14

56  
57 Across all service types there were indications that participants wanted services to be structured in a way that  
58 was more family-oriented or holistic. In inpatient settings, some participants wished family members could stay  
59  
60

1  
2  
3 overnight on MBUs, with a few women refusing admission because they did not want their family separated. In  
4 the community, some women (and, less commonly, partners) wanted couples/family therapy, saying their  
5 difficulties had persisted after treatment, and that they saw addressing the interpersonal context as important to  
6 resolving their struggles. There were also examples of women questioning why they were treated and medicated  
7 for what they saw as interpersonal difficulties.  
8  
9  
10  
11

12  
13 It would've been nicer to have sort of a more family, I know it doesn't really exist, but more of a  
14 family place that you could, so your partner and mother, so father, mother, and baby could all go  
15 there. And there'd be support for everybody...I think a lot of people would benefit from it.  
16  
17  
18

19 Partner 21  
20  
21

### 22 **3. Ambivalence about family involvement and support**

23  
24 Despite ostensibly wanting more family inclusion and support, many participants simultaneously seemed unsure  
25 about this, suggesting underlying ambivalence. This was not indifference on their part, but rather appeared to  
26 relate to anxieties about what greater family involvement or support would mean, whether it might make  
27 unmanageable demands on them, or have other undesirable consequences. Women's and their partners' and  
28 relatives' mixed feelings about family involvement sometimes seemed to reinforce the tendency for services to  
29 marginalise families creating a vicious cycle.  
30  
31  
32  
33  
34  
35

#### 36 **3.1 Feared consequences of family inclusion/support**

37  
38 Women's partners and other family members often described struggling with the burden on them. Many were  
39 trying to hold down a job, as well as to support the mothers and cope with the challenges of a new baby.  
40

41 Although they felt neglected by services, the idea of greater involvement, let alone taking up support  
42 themselves, could also feel unmanageable, given the competing demands on their time: "Even the thought of  
43 going to see a counsellor for an hour was just like, well I just don't have time for it." (Partner 2).  
44  
45  
46  
47  
48

49 Not only this, some participants appeared resistant to a greater focus on families for fear this might further  
50 disrupt their relationships or the 'status quo'. For example, in one case a woman believed her partner was  
51 reluctant to be more involved in her support or accept support himself for fear it might require him to face up to  
52 problems in their relationship, and change his behaviour and attitude towards her and their baby. Faced with his  
53 resistance, she said professionals seemed to back off, rather than persisting in exploring ways to engage with  
54 him.  
55  
56  
57  
58  
59  
60

1  
2  
3 I don't think [professionals] tried to help him enough to some degree. But then...he wasn't willing  
4 to work with me and [our baby]...He didn't want to work with them in any way, shape or form. And  
5  
6 too much of self-centred and selfish person. He doesn't want to change...They haven't really tried  
7  
8 to guide him in more taking it. They've left it more for him to do.  
9

10  
11 Mother 33  
12  
13

14  
15 It was also common for women themselves to express anxiety about the idea of family members being involved  
16 in their support, saying they would not 'understand'. This too appeared to relate in part to underlying concerns  
17 about what their involvement might mean for family relationships and whether family members might judge  
18 women negatively. It also seemed connected to underlying anxieties for women about how family inclusion  
19 might affect their protected time with clinicians and autonomy over their treatment, especially for those living in  
20 fraught family contexts. As outlined above, privacy was important for some women and, when family members  
21 were very involved, this could occasionally leave women themselves feeling deprioritised.  
22  
23  
24  
25  
26  
27  
28

### 29 **3.2 Partners and other family members have to 'stay strong'**

30  
31 Even though they struggled when women were distressed, and with the demands of a new baby, partners and  
32 other family members were often uncertain about accepting support themselves. Although they spoke of loss of  
33 sleep, anxiety, depression, stress, increased alcohol use and work-related difficulties, some were adamant that  
34 they did not need or want support themselves. Others expressed the view that they had to 'stay strong' and not  
35 'indulge' their own needs. A few felt more comfortable staying "in the background" (partner 1) and many  
36 seemed only really to find it acceptable for the mother (and baby) to get help.  
37  
38  
39  
40  
41  
42

43 I was looking after [our baby]. I still hadn't recovered from the sleep...So I kind of just, I don't  
44 need anyone's help, I'm just going to do this...And then, you know, after I'd go and see her at the  
45 MBU, and then I would have my cry...because I was in it and it was happening I just thought I  
46 don't really need any help, because it was [my wife] that needed the help.  
47  
48  
49

50  
51 Partner 2  
52  
53

54 Several women also subscribed to the view that their partners and wider families were 'strong' and not in need  
55 of support. This reduced their inclination to focus on their needs or push for support for them.  
56  
57  
58  
59  
60

1  
2  
3 “[My mum] doesn’t need it, like she’s one of those characters that doesn’t need emotional support,  
4 she’s very capable and she would never fall to pieces emotionally.”  
5  
6  
7

8 Mother 11  
9

10 A number of male partners meanwhile explicitly or implicitly connected their hesitation accessing support  
11 (including peer support) to beliefs that it was shameful and unmanly for men to voice needs. Male partners  
12 appeared to place a high value on not being ‘over-dramatic’: they wanted to wait to see if things would resolve  
13 of their own accord, and to work things out by themselves. At times this seemed to be partly connected to  
14 uncertainty about what it was ‘normal’ to feel in the perinatal period. However, there was also a sense that  
15 feelings of neediness challenged men’s sense of self-worth.  
16  
17  
18  
19  
20  
21

22 As a man, you don’t really need support. You think you can do it on your own, you’ll be fine. I  
23 don’t know how to ask people for help...I wouldn’t like to count on other people to tell me  
24 something that I maybe already know, who feel I don’t know. I like to try and figure out the  
25 problem and solve it myself.  
26  
27  
28  
29  
30

31 Partner 15  
32

33 It was conspicuous that, even when partners and other family members did want help, they often found it  
34 difficult to pinpoint exactly what it was they wanted. Some implied that they were willing to accept support to  
35 help them support women, but were not comfortable with support focused more directly on themselves. Several  
36 participants implied that men, in particular, were more likely to take up support that addressed their own needs  
37 if it was offered in an ‘informal’ or ‘incidental’ way.  
38  
39  
40  
41  
42

43 I kind of enjoy socialising but I don’t like being pushed to meet other people, so yes. That’s just  
44 guys though, more like you know, just they like to do it if it’s natural but if it’s organised you  
45 almost like sniff something, is that a trap?  
46  
47  
48  
49

50 Partner 8  
51

52 This desire for support to be ‘casual’ or ‘understated’ also reinforced the earlier points, where some family  
53 members said they did not so much want formal support, as greater recognition of the challenges they faced.  
54 They wanted to be noticed: for a professional to ask how they were, or to suggest having a “cup of tea” or an  
55 “informal chat”.  
56  
57  
58  
59  
60

## Discussion

In the UK, the newly published NHS long-term plan (20) emphasises the importance of mental health services working with and supporting the families of perinatal women. The importance of this is also increasingly recognised internationally, both in Western and non-Western societies (13,21). Yet relatively little is known about experiences of family involvement and support in practice. This study explored views of how services supporting women with perinatal mental health difficulties work with their families, from the perspectives of women, their partners and wider families. Women in the study had accessed treatment from a wide array of UK services for a range of diagnoses. They came from a broad mixture of socio-demographic and cultural backgrounds, and lived in differing family set-ups. Along with their partners and family members, they gave rich, qualitative accounts of their experiences.

Overall, analysis suggested that women's perinatal mental health difficulties need to be considered with reference to their family and interpersonal contexts. Contact with services takes place in the midst of complex relationship dynamics, which are in a state of flux with the arrival of a new baby. Although it was the women who had been diagnosed with perinatal mental health difficulties, their struggles often seemed to signify difficulties between family members, as much as within individual mothers, and with all members of a family experiencing distress. The perinatal period is a critical risk time for relationship strain and even domestic violence (22), and women in particular often connected their perinatal mental health difficulties to familial struggles (e.g. expressing frustration at having to take on the bulk of parenting), with families also playing a major role in relation to access to support and recovery.

Despite this, services were experienced as focusing on individual women (and babies), and not often engaging in a meaningful way with families or the interpersonal context. Services were seen as being structured in ways that tended to exclude family members, and professionals were experienced at times as ill-equipped and under-resourced to work with families. Family members were not regularly included in appointments, or kept informed about women's treatment, or asked for their own perspective, and there was a lack of acknowledgement of their needs or support for them. Though there were exceptions, this meant partners and families were often left feeling marginalised, unheard and unsupported, while women and their families said difficulties sometimes persisted after treatment because of a lack of wider focus. This study builds on our previous research which similarly highlighted the marginalisation of women's partners across a range of countries and service settings (15). This study suggests this marginalisation extends beyond partners to members of the wider family too. It



1  
2  
3 also echoes wider research, which shows that partners and wider families can feel excluded by mental health  
4 services outside of the perinatal period too (23, 24). Although families felt neglected across all types of service,  
5 MBUs were generally reported to be better at engaging with families than other services.  
6  
7

8  
9 Nevertheless, responses also suggested that it could be complex for professionals to balance family inclusion  
10 with the need to protect and prioritise women and their babies. This was especially true in light of women's  
11 fraught and sometimes abusive family contexts and, in some cases, their expressed desire for privacy from their  
12 families. Not only this, although women's families ostensibly wanted to be better included and supported, they  
13 also expressed ambivalence about this. In line with previous research (25,26), perceived norms of masculinity  
14 and fatherhood meant that male partners/fathers found it hard to acknowledge their own needs. Likewise, other  
15 family members often believed they had to 'stay strong'. Greater involvement and support could also feel  
16 unmanageable, given how much families already had to cope with, and there were signs too that women and  
17 their families were fearful about the possible disruption to their relationships and the 'status quo' that a greater  
18 focus on families could entail. This appeared to reinforce the tendency for services to overlook and exclude  
19 families, which, in turn, arguably contributed to increasing their perception of their own needs as insignificant in  
20 a vicious cycle.  
21  
22

23  
24 Viewed in their broader context, the findings suggest that mental health services supporting perinatal women  
25 tend to reflect and reinforce pervasive social norms and practices around motherhood, fatherhood and infant  
26 development. As described in the introduction, in wider society women are typically seen as natural nurturers  
27 who are expected to assume primary responsibility for infant development; fathers are encouraged to be 'equal'  
28 partners but, in reality, are relegated to the periphery (17). Our findings suggest that these culturally-embedded  
29 expectations place pressure on both women and their families which - along with other challenges - can  
30 contribute to provoking perinatal distress and can bring family members into conflict with each other. Yet  
31 instead of seeking to understand perinatal distress within its wider context - or indeed to challenge the structures  
32 and norms that may produce and maintain it - services appear focused on diagnosing and treating individual  
33 women, arguably even aiming to help them adjust to their expected role as primary nurturers, while  
34 marginalising fathers and wider families. In this way, rather than challenging dominant norms, services allow  
35 them to shape and guide practice. This is arguably further exacerbated by wider persisting cultural views of  
36 women as prone to 'hysteria' (itself derived from the Greek for 'uterus'), with men expected to be emotionally  
37 undemanding (27), and by a broader tendency within psychiatry to see distress as located within individuals'  
38 minds, deflecting from the need to address people's wider social, political or interpersonal contexts (28).  
39  
40  
41  
42  
43  
44  
45  
46  
47  
48  
49  
50  
51  
52  
53  
54  
55  
56  
57  
58  
59  
60

## Strengths and limitations

This study addressed a gap in the research literature, by interviewing a diverse group of women, as well as their partners, and wider family members about experiences of how services work with the families of women diagnosed with perinatal mental health difficulties. Nevertheless, it also had several limitations.

Firstly, as this study was nested within a wider research programme, only parts of each interview focused on experiences of family inclusion, limiting the time that could be spent discussing this topic, particularly as such a wide array of services were included. While rich data were nevertheless obtained, future research may benefit from dedicating full interviews to this topic. Secondly, interviews with women and their family members were analysed separately for the purposes of this paper. However, future research may benefit from analysing ‘pairs’ of interviews together to allow closer comparison and contrast of different perspectives. Thirdly, while in most cases interviews were carried out separately with women and their family members, in exceptional cases both were present. This could have had implications for what participants were willing to share in these cases (e.g. if they were unwilling to disclose some information in front of each other). Fourthly, interviews were carried out at 6-9 months postnatally, when treatment was often very recent or ongoing. It may be valuable for future research to follow-up families later once they have had longer to reflect on their experiences. Fifthly, it may have been valuable to have involved partners or grandparents in conducting interviews, to see if this generated unique insights based on shared perspectives. Inevitably researchers’ own experiences (e.g. of motherhood and perinatal mental health care) affect their interactions with participants and interpretations of the data: a male interviewer may, for example, have elicited different data from male partners, but all researchers were female. Finally, future research would benefit from exploring the perspectives of clinicians too, and placing greater emphasis on possible solutions to the challenges identified.

## Implications and conclusions

Study findings suggest that engaging with wider interpersonal networks is challenging and complex, but too important to ignore. Perinatal mental health difficulties, and access to treatment, do not occur within a vacuum, but within a wider social and interpersonal context, in which the family plays an influential role. Our findings suggest a need for professionals to approach women’s difficulties with greater focus on their social networks and to proactively challenge the ways in which the current set-up of services may reinforce dominant gender norms, and allow them to guide practice. At the same time, participants’ ambivalence about family inclusion and the divergent needs and wishes expressed means there is a danger in making assumptions about what might be

1  
2  
3 most helpful for them or how this might best work. Instead, at this stage research evidence is needed evaluating  
4 the effectiveness, acceptability and potential pitfalls of a range of potential approaches, preferably based on co-  
5 production principles to ensure the views of people with relevant lived experience and clinicians are central.  
6  
7

8  
9 Possible approaches that merit further exploration include: (i) considering how to adapt current practice to make  
10 it more family-friendly (e.g. by identifying acceptable ways to include partners/relatives more meaningfully in  
11 (at least some) appointments); (ii) challenging the way service structures currently deprioritise family members'  
12 needs, but also balancing this with protecting women's needs. (iii) developing or adapting couple or family-  
13 focused interventions for perinatal populations: previous reviews suggest that family therapy can help address  
14 and prevent perinatal depression (29,30), and that couple psychoeducation can support the transition to  
15 parenthood (31). In England, clinical guidelines recommend couple or family approaches for some perinatal  
16 mental health difficulties (14), but such interventions are rarely available and have not been extensively tested in  
17 the perinatal period (22); (iv) developing and testing resources/interventions aimed at women's partners and  
18 wider families, acknowledging that some will themselves also have perinatal mental health needs. This will need  
19 to take into account that some family members express a preference for more 'informal' or 'incidental' forms of  
20 support (though this also may be partly a result of services treating them as ancillary); (v) trialling specific staff  
21 training around engaging with families in the perinatal period, including awareness of cultural diversity.  
22  
23

24  
25 At the same time, it is important to ensure that any changes to practice do not result in simply pathologising  
26 fathers as well as mothers, or holding families solely responsible for problems relating to perinatal distress  
27 and/or infant development. Rather, there is a need to look beyond the family as well, recognising that families  
28 too are operating within the constraints of their broader social contexts and the resources available to them (32).  
29  
30 This may entail advocating for broader social changes to lessen the pressures on families.  
31  
32

### 33 34 35 36 37 38 39 40 41 42 43 44 45 **Funding**

46 This paper summarises independent research funded by the National Institute for Health Research (NIHR) under  
47 its PGfAR Programme (Grant Reference Number RP-PG-1210-12002). The views expressed are those of the  
48 authors and not necessarily those of the NHS, the NIHR or the Department of Health and Social Care. The study  
49 team acknowledges the study delivery support given by the local Clinical Research Networks.  
50  
51

52  
53  
54  
55 SJ is supported by the NIHR Mental Health Research Policy Unit, the NIHR Collaboration for Leadership in  
56 Applied Health Research and Care (CLAHRC) North Thames and the UCLH Biomedical Research Centre.  
57  
58  
59  
60

### Author contribution

BLT contributed to study concept and design, data collection, data analysis, interpretation of results and drafting of the manuscript. JB, NM, DB and SJ contributed to study concept and design and drafting of the manuscript.

All authors read and approved the final manuscript.

The authors declare that no competing interests exist.

**Data sharing:** The datasets generated and/or analysed during the current study are not publicly available due to them containing information that could compromise research participant privacy/consent but are available from the corresponding author on reasonable request.

**Acknowledgements:** The authors are very grateful indeed for the advice and support received from the Perinatal Service User and Carer Advisory Group, and from the wider ESMI study team. The study team would also like to thank all the women and their family members who gave up their time to take part in the study.

## References

1. Davey SJ, Dziurawiec S, O'Brien-Malone A. Men's voices: postnatal depression from the perspective of male partners. *Qual Health Res.* 2006 Feb;16(2):206–20.
2. Engqvist I, Nilsson K. Men's experience of their partners' postpartum psychiatric disorders: narratives from the internet. *Ment Health Fam Med.* 2011 Sep;8(3):137–46.
3. Muchena G. Men's experiences of partners' postnatal mental illness. *Nurs Times.* 2007;103(48):32–3.
4. Boddy R, Gordon C, MacCallum F, McGinness M. Men's experiences of having a partner who requires Mother and Baby Unit admission for first episode postpartum psychosis. *J Adv Nurs.* 2017 Feb;73(2):399–409.
5. Blackmore ER, Rubinow DR, O'Connor TG, Liu X, Tang W, Craddock N, et al. Reproductive outcomes and risk of subsequent illness in women diagnosed with postpartum psychosis. *Bipolar Disord.* 2013 Jun;15(4):394–404.
6. Paulson JF, Bazemore SD. Prenatal and postpartum depression in fathers and its association with maternal depression: a meta-analysis. *JAMA.* 2010 May 19;303(19):1961–9.
7. Boath EH, Pryce AJ, Cox JL. Postnatal depression: The impact on the family. *J Reprod Infant Psychol.* 1998 May 1;16(2–3):199–203.
8. Stein A, Pearson RM, Goodman SH, Rapa E, Rahman A, McCallum M, et al. Effects of perinatal mental disorders on the fetus and child. *The Lancet.* 2014 Nov 15;384(9956):1800–19.
9. Leahy-Warren P, McCarthy G, Corcoran P. First-time mothers: social support, maternal parental self-efficacy and postnatal depression. *J Clin Nurs.* 2012 Feb;21(3–4):388–97.
10. Grube M. Inpatient treatment of women with postpartum psychiatric disorders--the role of the male partners. *Arch Womens Ment Health.* 2005 Sep;8(3):163–70.
11. Holopainen D. The experience of seeking help for postnatal depression. *Aust J Adv Nurs Q Publ R Aust Nurs Fed.* 2002 May;19(3):39–44.
12. Letourneau N, Duffett-Leger L, Stewart M, Hegadoren K, Dennis C-L, Rinaldi CM, et al. Canadian mothers' perceived support needs during postpartum depression. *J Obstet Gynecol Neonatal Nurs JOGNN.* 2007 Oct;36(5):441–9.
13. The Royal Australian and New Zealand College of Obstetricians and Gynaecologists (RANZCOG). Mental health care in the perinatal period. [cited 2019 Mar 3]. Available from: [https://www.ranzcog.edu.au/RANZCOG\\_SITE/media/RANZCOG-MEDIA/Women%27s%20Health/Statement%20and%20guidelines/Clinical-Obstetrics/Mental-health-care-in-the-perinatal-period-\(C-Obs-48\).pdf?ext=.pdf](https://www.ranzcog.edu.au/RANZCOG_SITE/media/RANZCOG-MEDIA/Women%27s%20Health/Statement%20and%20guidelines/Clinical-Obstetrics/Mental-health-care-in-the-perinatal-period-(C-Obs-48).pdf?ext=.pdf)
14. National Institute for Health and Clinical Excellence. Antenatal and postnatal mental health: clinical management and service guidance, Clinical Guideline CG192. 2014.
15. Lever Taylor B, Billings J, Morant N, Johnson S. How do women's partners view perinatal mental health services? A qualitative meta-synthesis. *Clin Psychol Psychother.* 2018 Jan;25(1):112–29.
16. Machin AJ. Mind the Gap: The expectation and reality of involved fatherhood. *Father J Theory Res Men Parents.* 2015;13(1):36–59.
17. Tessa Baradon [Internet blog]. [cited 2019 Apr 7]. 'Out of mind': why do perinatal services not engage with fathers? Available from: <https://www.annafreud.org/insights/blogs/2019/03/out-of-mind-why-do-perinatal-services-not-engage-with-fathers/>

18. Hogg S. All Babies Count: spotlight on perinatal mental health - prevention in mind. National Society for the Prevention of Cruelty to Children; 2013.
19. Braun V, Clarke V. Using thematic analysis in psychology. *Qual Res Psychol*. 2006 Jan 1;3(2):77–101.
20. NHS England. NHS long-term plan [Internet]. [cited 2019 Jan 15]. Available from: <https://www.longtermplan.nhs.uk/wp-content/uploads/2019/01/nhs-long-term-plan.pdf>
21. WHO | Interventions for common perinatal mental disorders in women in low- and middle-income countries: a systematic review and meta-analysis [Internet]. WHO. [cited 2019 Apr 17]. Available from: <https://www.who.int/bulletin/volumes/91/8/12-109819/en/>
22. Rosan C, Grimas E. (PDF) The power of couple-focused approaches in the perinatal period. *J Fam Health Care*. 2016;26(1):10–3.
23. Rose, L. E., Mallinson, R. K., & Walton-Moss, B. Barriers to family care in psychiatric settings. *Journal of Nursing Scholarship: An Official Publication of Sigma Theta Tau International Honor Society of Nursing*. 2004. 36(1), 39–47.
24. Wilkinson, C, McAndrew, S. ‘I’m not an outsider, I’m his mother!’ A phenomenological enquiry into carer experiences of exclusion from acute psychiatric settings. *International Journal of Mental Health Nursing*. 2008. 17(6), 392-401.
25. Allen K. Father experience of postpartum depression. Alliant International University; 2010.
26. Letourneau N, Duffett-Leger L, Dennis C-L, Stewart M, Tryphonopoulos PD. Identifying the support needs of fathers affected by post-partum depression: a pilot study. *J Psychiatr Ment Health Nurs*. 2011 Feb;18(1):41–7.
27. Addis ME, Mahalik JR. Men, masculinity, and the contexts of help seeking. *Am Psychol*. 2003 Jan;58(1):5–14.
28. Filson, B. The Haunting Can End: trauma-informed approaches in healing from abuse and adversity. Chapter 3 in *Searching for a Rose Garden: Challenging Psychiatry, Fostering Mad Studies*. Eds J Russo, A Sweeney. 2016. pp 20-24.
29. Cluxton-Keller F, Bruce ML. Clinical effectiveness of family therapeutic interventions in the prevention and treatment of perinatal depression: A systematic review and meta-analysis. *PLoS ONE* [Internet]. 2018 Jun 14 [cited 2019 Apr 17];13(6).
30. Pinquart M, Teubert D. A Meta-analytic Study of Couple Interventions During the Transition to Parenthood. *Fam Relat*. 2010;59(3):221–31.
31. Petch J, Halford WK. Psycho-education to enhance couples’ transition to parenthood. *Clin Psychol Rev*. 2008 Oct 1;28(7):1125–37.
32. Dallos R, Urry A. Abandoning our parents and grandparents: does social construction mean the end of systemic family therapy? *J Fam Ther*. 1999 May;21(2):161–86.

Diagram of key themes expressed regarding different types of mental health service

Inpatient mental health services

Community mental health services

Specialist  
Mother and baby  
units

Generic  
psychiatric wards

Specialist perinatal

Generic non-perinatal

- Good collaboration with families, some support offered (though not enough)
- Families want e.g. more support with reuniting post-discharge
- Good at facilitating family visits
- But often far away for families
- Fragmentation of family unit, partners can't stay overnight etc.
- Mother/baby focus > hard for partners to 'fit in'

- Families must be proactive & persistent to be kept informed
- Not well set up for family visits
- Little in way of support offered for families
- Support not usually offered when partner or family member is left to look after baby singlehandedly during woman's admission

- Signs they may be better equipped than generic services at working with families; a few examples of supporting families/relationships well
- But families not very involved/supported, feel overlooked
- Emphasis on mother/baby

- Families overlooked, often no 'space' for them – at appointments/home visits
- Marginalised, often not offered support themselves
- Focus on individual not family
- Small number of examples (e.g. in community teams offering longer-term support) of including families well in difficult circumstances, where service knows family well

## Diagram of key themes by type of participant

### Women

- Many women say interpersonal conflict contributed to or exacerbated their perinatal distress.
- Believe their partners & families are marginalised, disregarded; want them to be helped to support them better, and offered support themselves.
- Women more likely than partners/other family members to mention wanting couple/family therapy.
- However, they also harbour anxiety about potential of family involvement/support to disrupt relationships further, marginalise their own needs, reduce their autonomy etc. Some women want privacy from their families.

### Partners and wider families

- Partners and wider families struggle themselves with adjustment to having a new baby; with impact of woman's struggles.
- Feel overlooked, marginalised by services.
- Want to be better informed about how to support women, and want their own needs to be acknowledged – someone to think about them, ask them how they are doing.
- But also they fear greater involvement might be unmanageable – they won't have the time or energy.

#### Partners

- Anxious also about possible destabilising effect of greater focus on them, possibility they might be required to change
- Feel they should 'be strong', not need help, norms of masculinity make it harder for men to accept support
- Say they prefer 'informal or 'incidental' support

#### Wider family

- Face difficulties relating to their unique role not being recognised. For example, grandparents being treated by professionals as a 'substitute partner' where mother is single
- Feel as 'carer' they should 'be strong', not need help, not take attention away from woman



## COREQ (COnsolidated criteria for REporting Qualitative research) Checklist

A checklist of items that should be included in reports of qualitative research. You must report the page number in your manuscript where you consider each of the items listed in this checklist. If you have not included this information, either revise your manuscript accordingly before submitting or note N/A.

| Topic                                          | Item No. | Guide Questions/Description                                                                                                                              | Reported on Page No. |
|------------------------------------------------|----------|----------------------------------------------------------------------------------------------------------------------------------------------------------|----------------------|
| <b>Domain 1: Research team and reflexivity</b> |          |                                                                                                                                                          |                      |
| <i>Personal characteristics</i>                |          |                                                                                                                                                          |                      |
| Interviewer/facilitator                        | 1        | Which author/s conducted the interview or focus group?                                                                                                   |                      |
| Credentials                                    | 2        | What were the researcher's credentials? E.g. PhD, MD                                                                                                     |                      |
| Occupation                                     | 3        | What was their occupation at the time of the study?                                                                                                      |                      |
| Gender                                         | 4        | Was the researcher male or female?                                                                                                                       |                      |
| Experience and training                        | 5        | What experience or training did the researcher have?                                                                                                     |                      |
| <i>Relationship with participants</i>          |          |                                                                                                                                                          |                      |
| Relationship established                       | 6        | Was a relationship established prior to study commencement?                                                                                              |                      |
| Participant knowledge of the interviewer       | 7        | What did the participants know about the researcher? e.g. personal goals, reasons for doing the research                                                 |                      |
| Interviewer characteristics                    | 8        | What characteristics were reported about the interviewer/facilitator? e.g. Bias, assumptions, reasons and interests in the research topic                |                      |
| <b>Domain 2: Study design</b>                  |          |                                                                                                                                                          |                      |
| <i>Theoretical framework</i>                   |          |                                                                                                                                                          |                      |
| Methodological orientation and Theory          | 9        | What methodological orientation was stated to underpin the study? e.g. grounded theory, discourse analysis, ethnography, phenomenology, content analysis |                      |
| <i>Participant selection</i>                   |          |                                                                                                                                                          |                      |
| Sampling                                       | 10       | How were participants selected? e.g. purposive, convenience, consecutive, snowball                                                                       |                      |
| Method of approach                             | 11       | How were participants approached? e.g. face-to-face, telephone, mail, email                                                                              |                      |
| Sample size                                    | 12       | How many participants were in the study?                                                                                                                 |                      |
| Non-participation                              | 13       | How many people refused to participate or dropped out? Reasons?                                                                                          |                      |
| <i>Setting</i>                                 |          |                                                                                                                                                          |                      |
| Setting of data collection                     | 14       | Where was the data collected? e.g. home, clinic, workplace                                                                                               |                      |
| Presence of non-participants                   | 15       | Was anyone else present besides the participants and researchers?                                                                                        |                      |
| Description of sample                          | 16       | What are the important characteristics of the sample? e.g. demographic data, date                                                                        |                      |
| <i>Data collection</i>                         |          |                                                                                                                                                          |                      |
| Interview guide                                | 17       | Were questions, prompts, guides provided by the authors? Was it pilot tested?                                                                            |                      |
| Repeat interviews                              | 18       | Were repeat interviews carried out? If yes, how many?                                                                                                    |                      |
| Audio/visual recording                         | 19       | Did the research use audio or visual recording to collect the data?                                                                                      |                      |
| Field notes                                    | 20       | Were field notes made during and/or after the interview or focus group?                                                                                  |                      |
| Duration                                       | 21       | What was the duration of the interviews or focus group?                                                                                                  |                      |
| Data saturation                                | 22       | Was data saturation discussed?                                                                                                                           |                      |
| Transcripts returned                           | 23       | Were transcripts returned to participants for comment and/or                                                                                             |                      |

| Topic                                  | Item No. | Guide Questions/Description                                                                                                        | Reported on Page No. |
|----------------------------------------|----------|------------------------------------------------------------------------------------------------------------------------------------|----------------------|
|                                        |          | correction?                                                                                                                        |                      |
| <b>Domain 3: analysis and findings</b> |          |                                                                                                                                    |                      |
| <i>Data analysis</i>                   |          |                                                                                                                                    |                      |
| Number of data coders                  | 24       | How many data coders coded the data?                                                                                               |                      |
| Description of the coding tree         | 25       | Did authors provide a description of the coding tree?                                                                              |                      |
| Derivation of themes                   | 26       | Were themes identified in advance or derived from the data?                                                                        |                      |
| Software                               | 27       | What software, if applicable, was used to manage the data?                                                                         |                      |
| Participant checking                   | 28       | Did participants provide feedback on the findings?                                                                                 |                      |
| <i>Reporting</i>                       |          |                                                                                                                                    |                      |
| Quotations presented                   | 29       | Were participant quotations presented to illustrate the themes/findings?<br>Was each quotation identified? e.g. participant number |                      |
| Data and findings consistent           | 30       | Was there consistency between the data presented and the findings?                                                                 |                      |
| Clarity of major themes                | 31       | Were major themes clearly presented in the findings?                                                                               |                      |
| Clarity of minor themes                | 32       | Is there a description of diverse cases or discussion of minor themes?                                                             |                      |

Developed from: Tong A, Sainsbury P, Craig J. Consolidated criteria for reporting qualitative research (COREQ): a 32-item checklist for interviews and focus groups. *International Journal for Quality in Health Care*. 2007. Volume 19, Number 6: pp. 349 – 357

**Once you have completed this checklist, please save a copy and upload it as part of your submission. DO NOT include this checklist as part of the main manuscript document. It must be uploaded as a separate file.**

# BMJ Open

## Experiences of how services supporting women with perinatal mental health difficulties work with their families: A qualitative study in England

|                                 |                                                                                                                                                                                                       |
|---------------------------------|-------------------------------------------------------------------------------------------------------------------------------------------------------------------------------------------------------|
| Journal:                        | <i>BMJ Open</i>                                                                                                                                                                                       |
| Manuscript ID                   | bmjopen-2019-030208.R2                                                                                                                                                                                |
| Article Type:                   | Research                                                                                                                                                                                              |
| Date Submitted by the Author:   | 20-Jun-2019                                                                                                                                                                                           |
| Complete List of Authors:       | Lever Taylor, Billie ; University College London, Billings, Jo; UCL<br>Morant, Nicola; University College London<br>Bick, Debra; University of Warwick<br>Johnson, Sonia; UCL, Division of Psychiatry |
| <b>Primary Subject Heading</b>: | Mental health                                                                                                                                                                                         |
| Secondary Subject Heading:      | Qualitative research                                                                                                                                                                                  |
| Keywords:                       | MENTAL HEALTH, QUALITATIVE RESEARCH, Quality in health care < HEALTH SERVICES ADMINISTRATION & MANAGEMENT, Perinatal, Partners, Families                                                              |
|                                 |                                                                                                                                                                                                       |

SCHOLARONE™  
Manuscripts

1  
2  
3 **Title: Experiences of how services supporting women with perinatal mental health difficulties work with**  
4 **their families: A qualitative study in England**  
5  
6  
7  
8  
9

10 \*Billie Lever Taylor<sup>1</sup>, Jo Billings<sup>1</sup>, Nicola Morant<sup>1</sup>, Debra Bick<sup>2</sup>, Sonia Johnson<sup>1</sup>  
11

12 <sup>1</sup>Division of Psychiatry, University College London, Division of Psychiatry, Maple House, 149 Tottenham  
13 Court Road, London, W1T 7NF, UK.  
14

15 <sup>2</sup>Warwick Clinical Trials Unit, Warwick Medical School, University of Warwick, Gibbet Hill, CV4 7AL, UK.  
16

17 \*corresponding author: Billie Lever Taylor (e-mail: [billie.taylor@ucl.ac.uk](mailto:billie.taylor@ucl.ac.uk); tel: 020 3549 5971)  
18  
19

20 **Key words:** perinatal mental health; qualitative; partners; fathers; families  
21  
22

23 **Word count:** 8,972  
24  
25  
26  
27  
28  
29  
30  
31  
32  
33  
34  
35  
36  
37  
38  
39  
40  
41  
42  
43  
44  
45  
46  
47  
48  
49  
50  
51  
52  
53  
54  
55  
56  
57  
58  
59  
60

## Abstract

**Objectives:** Partners and wider family members play a vital role in relation to women's perinatal mental health.

Clinical guidelines in the UK and internationally recommend that services supporting women with perinatal mental health difficulties involve and support their families too. However, little is known about family members' needs and experiences, or whether they feel included by mental health services. This study set out to explore this.

**Methods:** This research formed part of a wider study exploring experiences of perinatal mental health care in England. The broader study included semi-structured interviews with 52 women across England who received treatment for a perinatal mental health difficulty, and 32 family members identified by the women as offering them some support. Data from these 84 interviews relating to how services work with partners and families were extracted and analysed thematically.

**Results:** Analysis identified three overarching themes: 1) the centrality of women's families to their perinatal mental health/access to support; 2) experiences of partners and families being excluded by services; 3) ambivalence among women and their families about increasing family involvement/support. We found that partners and families appear to have an important influence on women's perinatal mental health, access to care, and interactions with services, but that services tend to focus on individual women (and babies) with little regard for their wider family context. The complexity of involving and supporting partners and families, coupled with anxiety about this among women and their families, reinforces the tendency to marginalise them.

**Conclusion:** Involving women's families and providing the support they need is challenging, but important. Experiences of women and their families of services treating perinatal mental health difficulties suggests greater focus is needed on overcoming barriers to family inclusion and on challenging underlying gender roles and expectations, rather than allowing these to shape and guide practice.

### Strengths and limitations of this study

- This study addressed a gap in the research literature, by interviewing women, their partners, and members of their wider family about their experiences of how services supporting women with perinatal mental health difficulties work with families.
- There is increasing policy emphasis on the need for mental health services to include and support families of perinatal women, but relatively little is known about how this is experienced in practice.
- This study included a large, diverse group of perinatal women and their family members with experience of a wide variety of mental health services, including mother and baby units, acute psychiatric wards, specialist perinatal community teams, and generic non-perinatal community teams.
- To our knowledge, this is the first published study to explore experiences of perinatal mental health care among wider family members as well as women's partners.
- It would have been useful to have explored clinician views of family involvement as well.

## Introduction

Mental health difficulties in the perinatal period (defined as pregnancy and the first year post-birth) are prevalent, affecting women as well as their partners and wider families, as families adjust to caring for a new baby. Research has shown that women's partners very often feel overwhelmed, lonely and frustrated when a woman experiences a perinatal mental health problem (1,2). Partners of women admitted to hospital with severe perinatal mental health difficulties report experiencing trauma, stress, fear, work-related difficulties and relationship problems (3,4). Almost one in five marriages ends following an episode of postpartum psychosis (5) and maternal postpartum depression is associated with *paternal* postpartum depression (6). While very little research has focused on women's extended families, one study found that - along with partners - siblings, parents and grandparents of women experiencing postnatal depression said the difficulties resulted in "a lot of worry within the family" (7). Research suggests there can be adverse outcomes for children too (8).

Partners and other family members also play a vital role in relation to women's perinatal mental health. Greater perceived support from a woman's partner or own mother is significantly correlated with lower rates of postnatal depression among first-time mothers (9), while having a supportive partner is strongly associated with shorter hospital stays among women with severe perinatal mental health difficulties (10). New mothers are also more likely to turn to their partners for support with their difficulties than to anyone else (11), while some are reluctant to access help because their partners dismiss their symptoms (12).

Best practice guidelines for perinatal mental health in the UK and internationally recommend including women's families in their care and supporting family members as well (13,14). Nevertheless, our recent systematic review and meta-synthesis found that, across a range of countries, partners of women with perinatal mental health difficulties reported feeling marginalised by services and confronted by a largely mother-baby-oriented environment (15). Our meta-synthesis also identified ambivalence on the part of women's partners about seeking greater support and involvement. These findings appeared to be connected to wider social trends: it has been argued that, although fathers increasingly aspire to be more 'involved' in the perinatal period and beyond, societal pressures and norms continue to relegate them to the periphery, while persisting beliefs about masculinity and fatherhood discourage them from seeking support for themselves (16). Meanwhile, women are seen as 'natural' nurturers, with emphasis placed on the importance of the mother-infant relationship, and with mothers viewed as holding primary responsibility for the emotional health of the infant (17)

1  
2  
3 Despite these insights, the studies identified by the systematic review had important limitations. In particular,  
4 many only touched briefly on partners' experiences of services, as part of a wider remit, and it was not always  
5 clear to which services or professionals the findings referred. Additionally, no studies were found that  
6 investigated views of services among family members other than partners. Given the increasing recognition that  
7 services treating perinatal mental health difficulties need to "think family" (18), further research into partner and  
8 family experiences is needed and may provide useful insights for clinical practice.

9  
10 The present study therefore sought to expand on previous research by exploring the role of partners and wider  
11 families in relation to women's perinatal mental health and access to services and experiences of family  
12 inclusion by services supporting women with perinatal mental health difficulties. Women's views were included  
13 along with those of their partners and wider families to allow different perspectives to be considered.

## 23 **Methods**

24  
25 This study was part of a wider research programme exploring the effectiveness of services treating perinatal  
26 mental health difficulties. As part of this research programme qualitative, semi-structured interviews were  
27 conducted with 52 women who had accessed National Health Service (NHS) treatment for a variety of perinatal  
28 mental health difficulties, and 32 of their partners/family members. These interviews explored participants'  
29 views and experiences of a wide range of mental health service(s). The current study focused on analysing those  
30 sections of the interviews relating specifically to experiences of how services worked with partners and families.  
31 NHS ethics approval was obtained (reference: 13/LO/1855).

## 39 **Recruitment**

40  
41 **Women:** Women were recruited from eleven NHS healthcare providers, across different areas of England,  
42 which varied in their urbanicity. Women were purposively sampled to obtain diversity of diagnosis, service use,  
43 and socio-demographic background. Inclusion criteria required that women were 16 years or over; English  
44 language speakers; had accessed NHS treatment for a perinatal mental health difficulty (during or after their  
45 most recent pregnancy); and had a baby aged 6-9 months old. Eligible women were identified and approached  
46 by a clinician within their mental health team. Those expressing an interest in participating were contacted by a  
47 researcher to provide them with more information about the study and obtain informed written consent if they  
48 were willing to take part. It was not possible to determine how many women refused participation as researchers  
49 were only informed of those who were interested.



1  
2  
3 **Family members:** As previously stated, for each participating woman, a partner or other family member was  
4 also interviewed wherever possible. Women were asked if they were able/willing to identify a family member,  
5 with some involvement in supporting them, and ask them if they might be willing to take part too (although  
6 women could still participate even if no one from their family could be interviewed). A researcher got in touch  
7 with family members who were potentially willing, to provide them with more information about the study.  
8 Informed written consent was obtained from all participating family members. Inclusion criteria required that  
9 participating family members were: 16 years or over; English language speakers; and were the partner/family  
10 member of a participating woman with some involvement in supporting her.  
11  
12

### 13 **Data collection**

14  
15 Interviews took place between June 2015 and March 2017, usually in participants' homes. Participants were  
16 asked, in semi-structured interviews lasting around an hour in total, about their views and experiences of all the  
17 services women had accessed for their perinatal mental health. As outlined, the current study focuses  
18 specifically on the interview sections relating to partner/family involvement. Specifically, women were asked:  
19 *Can you describe how services and professionals worked with other people who were supporting you and your*  
20 *baby (e.g. your partner, baby's father, family members, or friends)?* Partners/family members were asked: *What*  
21 *has been your role in supporting [mother] through this period? Can you describe how involved you have felt in*  
22 *[mother's] support and treatment? Can you describe any support you've received from services or professionals*  
23 *as someone supporting a mother who is having difficulties?* Follow-up probes to these main questions were used  
24 as appropriate to encourage participants to give full accounts of their experiences. Given the qualitative nature  
25 of the study, related issues were sometimes also touched on elsewhere in their interviews and were included in  
26 the analysis where relevant. Participants were informed that their contributions would be kept confidential with  
27 identifying details removed, but that the researcher would pass on information if he/she had major concerns  
28 about their safety or that of others; ultimately concerns were passed to social services in relation to information  
29 provided by one woman (with her agreement).  
30  
31

32  
33 Interviews with women were carried out separately to family members, with a few exceptions. Most interviews  
34 (n=70) were conducted by the first author, who is a clinical psychologist, researcher and mother. A small  
35 number (n=14) were also carried out by: a professor of social work; a member of the study's perinatal service  
36 user and carer advisory group; and two MSc students studying clinical mental health sciences.  
37  
38  
39  
40  
41  
42  
43  
44  
45  
46  
47  
48  
49  
50  
51  
52  
53  
54  
55  
56  
57  
58  
59  
60

## Analysis

Interviews were audio-recorded, transcribed and anonymised. Researcher notes were also written up after each interview. In two cases, interviews were accidentally not recorded and researcher notes were analysed instead. Thematic analysis was used (19), with themes and subthemes identified in a cyclical process of reading, coding and exploring patterns in the data. To enhance validity, a second researcher independently coded nine interviews with women and seven with family members, with consensus reached on the coding frame through discussion. Analysis was facilitated by using NVivo qualitative analysis software. Given the large number of interviews, two separate datasets were created; one for women and one for family members. Participants in each dataset were also categorised by the type(s) of service women accessed. Contrasts were explored across participant groups and services: several key themes were universally reported across different groups but findings unique to types of participant (e.g. male partners) or service (e.g. MBUs) were also identified.

## Patient and public involvement

Interview guides were developed by the research team and reviewed and amended by a perinatal service user and carer advisory group (with experience of perinatal mental health care). Pilot interviews were carried out with one woman and one partner from this group, and then with four other women who had accessed perinatal mental health support, and two of their partners/relatives. The latter six interviews were included in the final sample since they met study eligibility criteria and only minor changes to the interview schedules were needed (e.g. to reduce the number of probes and expand the opening/introductory text). Five of the main study interviews were then carried out by a woman from the advisory group, and another woman from this group, along with two partners, also reviewed the manuscript which was edited based on their feedback.

## Results

### Characteristics of participants and services accessed

Tables 1 and 2 show participants' characteristics. Women had a range of diagnoses including depression, psychotic disorders, personality disorder, and anxiety disorders. Their mean age was 32 years (range: 19-43) and around two thirds were living with a partner.

Just over two thirds of participating family members were women's partners (one female, the others male), while around a fifth were parents of participating women (referred to as 'grandparents'). The mean age of

women's partners was 34 years (range: 23-48), while for grandparents it was 54 years (range: 39-67) (the young age of grandparents may reflect the fact that they were often the chosen source of support for the younger and single mothers included).

**Table 1.** Key characteristics of participating women (N=52)

| Characteristics                                         | Category                            | Respondents (n; %)        |
|---------------------------------------------------------|-------------------------------------|---------------------------|
| Primary diagnosis                                       | Depression                          | 19 (37%)                  |
|                                                         | Psychosis/bipolar/schizophrenia     | 13 (25%)                  |
|                                                         | Personality disorder                | 11 (21%)                  |
|                                                         | Anxiety                             | 9 (17%)                   |
| Service used<br>(women could use more than one service) | Perinatal                           |                           |
|                                                         | MBU                                 | 10 (19%)                  |
|                                                         | Specialist perinatal community team | 18 (35%)                  |
|                                                         | Specialist health visitors/midwives | 12 (23%)                  |
|                                                         | Non-perinatal                       |                           |
|                                                         | General acute ward/crisis house     | 11 (21%)                  |
|                                                         | Crisis resolution team              | 17 (33%)                  |
|                                                         | Community mental health team        | 15 (29%)                  |
| Previous service use for mental health                  | Talking therapy service             | 10 (19%)                  |
|                                                         | Early intervention in psychosis     | 3 (6%)                    |
| Age                                                     | Yes                                 | 42 (81%)                  |
|                                                         | No                                  | 10 (19%)                  |
| Ethnicity                                               | Mean age                            | 32 yrs (range: 19-43 yrs) |
|                                                         | < 25 years                          | 6 (12%)                   |
|                                                         | 25 - 29 years                       | 12 (23%)                  |
|                                                         | 30 - 39                             | 29 (56%)                  |
|                                                         | > 39 years                          | 5 (10%)                   |
| Work status                                             | White British                       | 28 (54%)                  |
|                                                         | White Other                         | 6 (12%)                   |
|                                                         | Black Caribbean                     | 5 (10%)                   |
|                                                         | Black African                       | 4 (8%)                    |
|                                                         | Black other                         | 2 (4%)                    |
|                                                         | Asian                               | 4 (8%)                    |
|                                                         | Arab                                | 1 (2%)                    |
| Level of education                                      | Mixed Race                          | 2 (4%)                    |
|                                                         | Employed full-time                  | 1 (2%)                    |
|                                                         | Self-employed part-time             | 2 (4%)                    |
|                                                         | Maternity leave                     | 22 (42%)                  |
|                                                         | Unemployed/homemaker                | 23 (44%)                  |
| Living with partner                                     | Unable to work due to illness       | 4 (8%)                    |
|                                                         | No formal qualifications            | 8 (15%)                   |
|                                                         | Secondary leaving qualifications    | 22 (42%)                  |
|                                                         | Undergraduate degree                | 10 (19%)                  |
| Number of children                                      | Postgraduate degree                 | 12 (23%)                  |
|                                                         | Yes                                 | 35 (67%)                  |
|                                                         | No                                  | 17 (33%)                  |
| Custody status                                          | 1                                   | 26 (50%)                  |
|                                                         | 2                                   | 13 (25%)                  |
|                                                         | 3+                                  | 13 (25%)                  |
| Custody status                                          | Retained custody of baby            | 47 (90%)                  |
|                                                         | Not in custody of baby              | 5 (10%)                   |

**Table 2.** Key characteristics of participating family members (N=32)

| Characteristics        | Category                           | Respondents (n; %)        |
|------------------------|------------------------------------|---------------------------|
| Relationship to mother | Husband/partner                    | 22 (69%)                  |
|                        | Mother/father ('grandparent')      | 7 (22%)                   |
|                        | Other relative (e.g. sister/child) | 3 (9%)                    |
| Age                    | Mean age (partners)                | 34 yrs (range: 23-48 yrs) |
|                        | Mean age (grandparents)            | 54 yrs (range: 39-67 yrs) |
|                        | Mean age (other relatives)         | 21 yrs (range: 17-24 yrs) |
|                        | < 25 years                         | 4 (13%)                   |
|                        | 25 - 29 years                      | 8 (25%)                   |
|                        | 30 - 39                            | 10 (31%)                  |
| Ethnicity              | > 39 years                         | 10 (31%)                  |
|                        | White British                      | 19 (59%)                  |
|                        | White Other                        | 6 (19%)                   |
|                        | Black Caribbean                    | 2 (6%)                    |
|                        | Black African                      | 2 (6%)                    |
| Living with mother     | Asian                              | 3 (9%)                    |
|                        | Yes                                | 26 (81%)                  |
| Work status            | No                                 | 6 (19%)                   |
|                        | Employed full-time                 | 15 (47%)                  |
|                        | Employed part-time                 | 1 (3%)                    |
|                        | Self-employed full-time            | 4 (13%)                   |
|                        | Self-employed part-time            | 1 (3%)                    |
|                        | Student                            | 3 (9%)                    |
|                        | Unemployed/retired/carer           | 8 (25%)                   |
| Level of education     | No formal qualifications           | 1 (3%)                    |
|                        | Secondary leaving qualifications   | 19 (59%)                  |
|                        | Undergraduate degree               | 6 (19%)                   |
|                        | Postgraduate degree                | 5 (16%)                   |
|                        | Not recorded                       | 1 (3%)                    |

The mental health services which women had accessed, and on which participants thus based their experiences, were diverse. Details of the main services participants described are given in Table 3. Some women (with a range of diagnoses) were admitted with their babies to specialist mother and baby units (MBUs), while others were separated from their babies, as they were admitted to general psychiatric wards with no provision for infant care. In the community, some women were treated by specialist secondary care perinatal mental health services (for a range of moderate to severe difficulties), or by specially trained mental health midwives or health visitors (for milder difficulties). Others received support from generic, non-perinatal mental health services such as crisis teams (for acute difficulties), multi-disciplinary community mental health teams (for moderate to severe difficulties), or services offering talking therapies, usually cognitive-behavioural based (for milder difficulties). Some women also received support from non-perinatal services specialising in particular diagnoses (e.g. early intervention in psychosis services). Many women accessed more than one service.

**Table 3.** Description of key services included

| Specialist perinatal or non-perinatal service | Type of service                                   | Brief description                                                                                                                 |
|-----------------------------------------------|---------------------------------------------------|-----------------------------------------------------------------------------------------------------------------------------------|
| Specialist perinatal                          | Mother and Baby Unit (MBU)                        | Specialist hospital where women with acute mental health difficulties are admitted together with their babies                     |
|                                               | Specialist perinatal community mental health team | Multidisciplinary teams treating women in the community with moderate to severe perinatal mental health difficulties              |
|                                               | Specialist health visitors/midwives               | Health visitors and midwives with additional training to offer support to women with mental health difficulties                   |
| Non-perinatal                                 | General acute psychiatric ward                    | General psychiatric hospitals for adults with mental health difficulties where women can be admitted (without their babies)       |
|                                               | Crisis resolution team                            | Generic multidisciplinary teams offering short-term intensive home treatment to people experiencing an acute mental health crisis |
|                                               | Early intervention in psychosis service           | Multidisciplinary teams offering long-term, intensive support to people experiencing a first episode of psychosis                 |
|                                               | Community mental health team                      | Generic multidisciplinary teams treating adults with moderate to severe mental health difficulties                                |
|                                               | Talking therapy services                          | Generic community services offering brief psychological therapy for anxiety and depression                                        |

## Overview of themes

Three overarching themes were identified in the analysis: 1) the centrality of women's families to their perinatal mental health and access to support; 2) experiences of partners and families being excluded by services; 3) ambivalence among women and family members about increasing family involvement/support. Table 4 shows sub-themes for these, each of which is presented and elaborated on in the text below. Given the large and diverse samples included in this study, supplementary files 1 and 2 provide an overview of how participants' views and experiences vary in relation to different types of mental health services (supplementary file 1), and in relation to their status as direct service users (women with perinatal mental health difficulties), partners, or wider family members (supplementary file 2). Overall, women, their partners, and wider family members considered families were marginalised by services and should be better included and supported. But they also

described some unique anxieties about this. While all types of mental health service were reported to marginalise families, MBUs were seen as the most inclusive.

**Table 4. Themes and sub-themes identified**

| Themes                                                                                | Sub-themes                                                                                                                                                                                                                                                  |
|---------------------------------------------------------------------------------------|-------------------------------------------------------------------------------------------------------------------------------------------------------------------------------------------------------------------------------------------------------------|
| Centrality of women's families to their perinatal mental health and access to support | The role of interpersonal transition and conflict<br>Influence of the family on support and recovery                                                                                                                                                        |
| Experiences of partners and families being excluded by services                       | Overlooking families<br>Lack of support for partners and other family members<br>Difficulties balancing women's and family members' needs<br>Services ill-equipped for complexity of family involvement<br>Structure of services and separation of families |
| Ambivalence about increasing family involvement/support                               | Feared consequences of family inclusion/support<br>Partners and other family members have to 'stay strong'                                                                                                                                                  |

## 1. The centrality of the family to perinatal mental health and access to support

A key finding expressed by women, partners and other family members centred on the importance of women's families to their difficulties, interactions with services, and longer-term recovery. This view was expressed irrespective of diagnosis, with findings indicating that a woman's mental health needs should be addressed with reference to her family and interpersonal context.

### 1.1 The role of interpersonal transition and conflict

Women and their family members described pregnancy and having a baby as a major life transition: it resulted in shifts in their roles, relationships and identities, and this could provoke distress. Though the adjustment could be particularly marked for first-time parents, the addition of further children could also disrupt the status quo.

It was conspicuous how frequently participants linked interpersonal conflict and tension to the woman's difficulties. Women, in particular, often cited discord with their partner or wider family as contributing to, or exacerbating their mental health difficulties. Several described their relationships with partners, as well as with wider family members and friends as having broken down during pregnancy or after giving birth, often leaving

1  
2  
3 them struggling to live up to their image of the 'perfect' mother, and to cope with their babies singlehandedly.  
4  
5 Other women felt frustrated and overburdened, saying their partners did not help enough with the new baby, or  
6  
7 did not really understand how difficult motherhood was.  
8

9  
10 When I first told [my husband] about my depression...he just didn't get it. And it's almost like  
11  
12 anything I say is an attack on him...or 'Oh, well, if you're feeling depressed, imagine how I'm  
13  
14 feeling, you know, trying to work and pay the rent'...And he's self-employed, so if I do want to go  
15  
16 out or something...he's like, 'I can't be turning work down.'...I've not gone out in the evenings  
17  
18 since having the baby...He said, 'Oh, we've had so many problems since the baby was  
19  
20 born'...She's nearly torn us apart.

21  
22  
23  
24  
25  
26  
27  
28  
29  
30  
31  
32  
33  
34  
35  
36  
37  
38  
39  
40  
41  
42  
43  
44  
45  
46  
47  
48  
49  
50  
51  
52  
53  
54  
55  
56  
57  
58  
59  
60  
Mother 37

Some participants, most commonly women's partners, expressed the view that family relations had become strained as a result of the woman's mental health difficulties, rather than vice-versa - for example saying they believed women became difficult, or even suspicious and hostile towards their families, because of postnatal depression or psychotic delusions. In some cases, women's partners also felt rejected or deprioritised by them after the birth of the baby, prompting clashes and distress.

I've had my own challenges as well with the change in our lives...If I was on [my wife's] list before, I'm- I was at the bottom of the list, I'm now not on the list...  
You don't have an adult relationship in the same way that you did...You know, I come in from work and [my wife] wants to get to bed early if she's tired. So you have those sort of like clashes really.

Partner 4

These turbulent relationship shifts were not confined only to women and their partners. Sometimes grandparents or, less frequently, other relatives were also heavily involved (e.g. where women's relationships with their partners had broken down) and, in such cases, the birth of a baby often necessitated a reorganisation of wider family relations too. For example, one single mother was living with her father and he associated her difficulties partly with their own shifting relationship in the context of a new baby.

I know that at the moment [my daughter's] suffering with a bit of postnatal depression...I know because she has screaming rows...

1  
2  
3 When we argue about stuff, the crux of the argument, when we're sort of nose to nose is, 'I'm not  
4 your bloody boyfriend and I'm not his dad. You don't get to-, if I was his dad you could talk to me  
5 like that...But I'm not, I'm your dad.' And from [my daughter's] point of view it's like, 'I'm raising  
6 this baby on my own'...That kicks me right in the teeth because it's like, 'I'm here.'

7  
8  
9  
10  
11 Grandparent 3  
12

13 Overall, although it was the women who had been given the diagnosis of a perinatal mental health problem,  
14 their difficulties were frequently embedded within a complex and fraught wider interpersonal context, where the  
15 whole family was struggling.  
16  
17

## 18 19 20 **1.2 Influence of the family on support and recovery** 21

22  
23 Women's contact with mental health services took place in the context of the complex, shifting family dynamics  
24 described. It was clear that family circumstances, and the attitudes and behaviours of family members,  
25 influenced women's access to support, interactions with services, and recovery. Women who had some of the  
26 'worst' outcomes (e.g. the five women who had lost custody of their babies) were typically living in particularly  
27 challenging family contexts, categorised by conflict, relationship breakdown, and sometimes violence and abuse  
28 from partners or other family members. When women perceived their families to be unsupportive or dismissive  
29 of their struggles, it could increase or prolong their distress.  
30  
31  
32  
33  
34  
35

36  
37 [My husband] was like... 'You're not the woman I thought you were. This behaviour is just awful.  
38 You're not loving the children.' And it just wasn't working. And then eventually it got worse, I  
39 think I, within two weeks anyway I was like completely suicidal.  
40  
41

42  
43 Mother 11  
44  
45

46 In a few cases, partners or other family members put pressure on women not to access support. This could be  
47 because they were anxious about women taking medication, or feared professionals might judge the family  
48 negatively, or even take the baby away. In some cases, women turned down treatment because of perceived  
49 family resistance; in other cases they kept their treatment secret. This could be especially sensitive for women  
50 from ethnic minority backgrounds, who sometimes reported that perceived stigma around mental health within  
51 their wider family and social networks resulted in them hiding their difficulties and treatment from their  
52 families.  
53  
54  
55  
56  
57  
58  
59  
60



1  
2  
3 On the other hand, there were numerous instances where partners and other family members were supportive of  
4 women's treatment and recovery. They were often seen (by women in particular) as instrumental in identifying  
5 women's difficulties, encouraging them to get help, and assisting their recovery, with some family members  
6 describing their relief when women accessed support. Women with proactive family members supporting and  
7 advocating for them seemed to get access to professional support more readily than those without.  
8  
9

10  
11  
12  
13 Furthermore, when women struggled, their partners and wider families frequently took over household chores or  
14 helped more with the baby, for example doing night feeds or looking after the baby while the woman attended  
15 appointments or was hospitalised. Women from some cultural backgrounds (e.g. Asian) sometimes reported that  
16 a high level of involvement with infant care from extended family networks was the norm. For other families,  
17 taking on extra responsibilities could put a strain on partners and wider families as well and, in some cases, they  
18 also blamed themselves for what had happened.  
19  
20  
21  
22  
23

24  
25  
26 As a man, or partner, husband, you feel like it's your fault your partner is the way that they  
27 are... Maybe I've not loved her enough. Maybe I've not helped enough. But really, in essence,  
28 you're probably doing as much as you can, or doing more than what you normally do... I blamed  
29 myself a little bit, not just for, you know, the pregnancy and the baby, but just, I don't know,  
30 everything really.  
31  
32  
33  
34

35 Partner 15  
36  
37

## 38 **2. Experiences of partners and wider families being excluded by services**

39  
40

41 Despite their perceived importance, many of those interviewed believed families were excluded by services  
42 supporting women with perinatal mental health difficulties. Experiences of this were reported by women,  
43 partners and wider family members across different demographics, diagnoses and service types, although MBUs  
44 appeared to be more inclusive of families than other services. Analysis suggested that this exclusion of families  
45 was manifested in various ways including: not being invited to or included in appointments; not being provided  
46 with information about, or helped to understand, the mother's mental health problems; not being involved in  
47 treatment decisions; their own distress and difficulties not being acknowledged; and not being offered any  
48 support for these difficulties.  
49  
50  
51  
52  
53  
54  
55  
56  
57  
58  
59  
60

## 2.1 Overlooking families

It was common for women and their family members to say that professionals overlooked partners and wider families, focusing their attention exclusively on women and their babies. Mirroring this, some participants conceded that they too had given little thought to family involvement - e.g. not thinking to ask if family members could attend appointments/access support themselves - even if, in hindsight, women and their family members alike thought this could have been valuable.

Within community mental health services in particular (both specialist perinatal services and generic, non-perinatal services) there were sometimes few opportunities for family members to become involved or meet clinicians (e.g. where they weren't invited to appointments), and a sense that there was no real "place for, like, a husband" (Partner 15). As a result, women's families often felt poorly informed about their difficulties and treatment; they were unsure exactly what support a woman was receiving, what to expect, and how best to help her.

I wing it every day with supporting [my partner], so I don't know the correct way... There's been no support there to help me. I feel sometimes the best way for me to support [her] is just agree with her and deal with it after... But I don't know whether that's the right way to go about it overall. She's got a [specialist perinatal] psychiatrist. What about support for the dad in this case?

Partner 9

A number of women and their family members wanted families to be included in at least some appointments; they felt this would both allow them to contribute their own observations, and also help them better understand and support women.

It would've been nice to have had a bit more involvement [with the talking therapy] as far as, you know, meetings or otherwise just so that I have a better grasp to understand what issues we're dealing with... I guess I didn't know, within the structure of how everything works, how I could get involved.

Partner 5

[My husband] wanted to speak to professionals to tell them his side... I would [have liked that too], just to see, you know, because he's not like the easiest of men, but then he's not responded in a way

1  
2  
3 that I needed him to respond...And he's never ever approached me in a way he needs to approach  
4  
5 me, so it makes me worse.  
6

7 Mother 50  
8  
9

10 When mental health professionals visited women at home, family members really valued being included and  
11 asked for their input. But some felt they were ignored.  
12

13  
14 I've never really talked to [the early intervention service care coordinator]...Like she comes here  
15 and talks to [my partner]. Doesn't really say much to me or doesn't ask me, 'How do you think she  
16 is?', or things like that. I mean nothing...It would have been nice for her to say, 'Well I'll involve  
17 you in some of the meetings.' But you don't get nothing.  
18  
19  
20  
21

22 Partner 11  
23  
24

25 Where women were admitted to MBUs or psychiatric wards, their families were more likely to have at least  
26 some contact with clinicians on inpatient units. For example, they might speak to them when visiting women or  
27 arranging visits, and some were involved in treatment decisions if women were judged to lack capacity. MBUs  
28 were praised overall for working collaboratively with women's families, regularly communicating with them, as  
29 well as inviting them to be present at ward rounds and taking their views into account. By contrast, family  
30 members had to be proactive and persistent to get staff on general psychiatric wards to keep them updated on the  
31 woman's condition and treatment plan. A few women said staff on acute wards treated them like "a single  
32 person" (mother 44), hardly acknowledging their families, and sometimes not even realising they had a new  
33 baby. One man, whose partner stayed on both an MBU and an acute ward, described the MBU as more inclusive  
34 of him than the acute ward.  
35  
36  
37  
38  
39  
40  
41  
42

43  
44 Two or three days go and then I would call [the ward] again because they never, well they hardly  
45 ever called me. It was me trying to find out things all the time.  
46  
47

48  
49 I was asked to attend [meetings at the MBU] if I wanted to. You know, they wanted me to attend to  
50 see...It was run like with partners in mind. They wanted the partners to be involved and to, you  
51 know, to help in the whole process.  
52  
53

54 Partner 14  
55  
56  
57  
58  
59  
60

## 2.2 Lack of support for partners and other family members

As well as wanting information about and involvement in women's support, some partners and family members said they would have valued emotional support from mental health professionals themselves, for their own distress; they wanted help coping with the effects of the woman's mental health problems on them, and addressing their own difficulties adjusting to life with a new baby. Across our data corpus and regardless of community, inpatient, perinatal or non-perinatal mental health settings, few accounts were provided of support targeted at family members.

In general, families wanted support to be offered face-to-face or over the telephone: "It would have been nice if somebody was there to just call me occasionally saying, 'How are you doing?'" (Grandparent 6). In particular, they wanted professionals to acknowledge how difficult things were for them and check how they were doing. Several partners and other family members felt that nobody was thinking about them.

I felt I wasn't being more involved, like, and no one's coming to me, like, 'How are you doing? How is your mental health state?' And all this, you know. Because it's not easy. And I get a bit, like, okay. No one's asking me how I am. How about me? I thought, it's not only her going through this, it's me. I'm there and all.

Partner 7

There were a few exceptions where professionals, most commonly perinatal specialists on MBUs or in the community, had acknowledged family members' needs and engaged with them too, and when this happened it was valued.

[I had] lots of, just informal chats... Different members of the [MBU] staff would ask me how I'm coping, am I alright? How are things at home? And sometimes I sort of took up the offer to sit and have a bit more of a chat.

Partner 12

However, even when support had been offered, it was frequently viewed as superficial, insufficient or too late.

I was offered support [after my wife's MBU admission], but it was all sort of quite late on in the process. And kind of, ultimately, you had a meeting with someone at home. They were very nice. But none of the things that were due to be followed up on were followed up on.

Partner 17

### 2.3 Difficulties balancing the needs of women and their family members

In some cases, rather than simply overlooking partners and wider families, respondents' accounts suggested that clinicians may have excluded partners or family members because of concerns that involving them could reduce the focus on the needs of the woman (and baby), or because they were mindful of the need to protect women's potential desire for confidentiality from their families. These issues were complex; as outlined, some women kept aspects of their mental health or treatment secret from their families, while others described experiencing turbulent, unequal and sometimes coercive and abusive relationships, meaning privacy and time alone with professionals could be vital. Prioritising the needs of women and babies, and keeping a clear focus on them, seemed essential in this context. Yet it could also leave family members feeling shut out. Several family members, across different types of service, described how they had wanted to put across their own opinions (e.g. if they felt a woman was struggling more than she admitted, or wanted to tell professionals that a woman's hostility towards them was, in their view, really driven by paranoia, psychosis or similar). But they felt mental health professionals were unwilling to speak to them or appeared cautious or mistrustful of them (occasionally also linking this to the female-dominated nature of staff within both perinatal and non-perinatal mental health services).

I wanted to say to the [specialist] health visitor, 'Look maybe do you think that this could be postnatal depression...?' I would have liked the chance to discuss it with her. Not that I wanted to encroach on any of [my daughter's] time with her...But alas...If I was in the room then everything sort of stopped until I left the room, and then they recommenced...The minute I walked in it was like tumbleweed.

Grandparent 3

For their part, some women who desired privacy from their families had still wanted them involved in some way. For example, one woman from an ethnic minority background saw value in involving her husband in her care, but at the same time kept some details of her difficulties secret from him due to perceived cultural stigma around mental health. She wished professionals had helped her negotiate this, offering her more options for how he might be included given this context.

[The community team] haven't told me, 'How would you like us to involve [your husband]?' They just told me to bring him to my appointments. But I don't want to bring him to my appointments because they might bring up something that he doesn't know and then that would just cause

1  
2  
3 problems afterwards...[I'd like to] take him along with me [so he could get] some sort of  
4 understanding... But like I said, it's either come to my appointments or don't get involved.  
5  
6  
7

8 Mother 35  
9

10 However, adding to the complexity, a few participants said that too much emphasis on involving partners or  
11 family members could leave women themselves marginalised. This suggested that professionals at times  
12 experienced difficulties determining the appropriate emphasis to place on different people's needs or  
13 perspectives – especially where interpersonal relationships were strained.  
14  
15  
16

17  
18 When you're in hospital, they hardly listen to you. Well, this is my experience, my feeling. That, it's  
19 like they hardly listen to you at all because they know the reason you're in hospital is because  
20 you're unwell. So they listen to [my husband].  
21  
22  
23

24 Mother 26  
25  
26

27 Nevertheless, there were a small number of examples that suggested it was possible to protect women's needs  
28 without excluding their families, even in difficult circumstances. These were usually cases where professionals  
29 had built up a good picture of the family context, for example in non-perinatal mental health teams which had  
30 been involved longer-term, not only during the perinatal period. For example, the partner of one woman (who  
31 had a pre-existing diagnosis of bipolar disorder and experienced postpartum psychosis) described how, although  
32 he initially felt marginalised by community mental health team clinicians, he felt they had got to know the  
33 family situation better over time, and became more adept at meeting both his and his wife's needs.  
34  
35  
36  
37  
38  
39

40  
41 It's been a very fine line to tread for them and they've done it very well...Not making me feel  
42 excluded...Not using confidentiality as a rather convenient way of just not having to deal with  
43 me...But finding sensitive and appropriate you know, professionally appropriate ways around that  
44 so that they get the information they need from me...And that I still feel supported.  
45  
46  
47  
48

49 Partner 12  
50  
51

## 52 **2.4 Services ill-equipped for complexity of family inclusion**

53

54 As the findings above suggest, complex interpersonal dynamics between women and their families meant family  
55 involvement was not always straightforward. There were indications that mental health professionals at times  
56 felt ill-equipped or under-resourced to deal with this complexity, marginalising family members as a result. For  
57 example, in one case, a woman believed her perinatal nurse excluded her partner from appointments because she  
58  
59  
60

1  
2  
3 did not feel suitably trained to deal with the tensions in their relationship. Nobody else, she said, was able to  
4 support her partner or see them together either.  
5  
6

7 I'm just, basically like, surprised that there is no support system for carers, or friends, or partners, or  
8 family members, there's no support system whatsoever...  
9

10 [My perinatal mental health nurse] doesn't want to make it worse. It's like a very different, couples  
11 therapy, like dealing with two people in the same room who've got conflict with each other, it's a  
12 very different thing, yes. And like, so I think, I don't know how many years of training it is, but like,  
13 she doesn't have that training, she can't do it, yes.  
14  
15  
16  
17  
18

19 Mother 8  
20

21 There were a few exceptions, where participants described practitioners, most often specialist perinatal  
22 practitioners, as engaging confidently with the family context; this was appreciated. Yet in other cases, partners  
23 and family members believed professionals excluded them because their perspectives could be awkward or  
24 difficult.  
25  
26  
27  
28

29 I'm quite happy to go in there and say to them, 'I don't like the way you're doing this' or, 'I don't  
30 think it's right what you're doing' or, 'you shouldn't be doing it.' And I don't think they liked  
31 it...And I just think it's because, a bit of bad blood between us that they just distanced their self  
32 away.  
33  
34  
35  
36

37 Grandparent 5  
38

39 Where wider families were involved, in particular when grandparents were helping single mothers, they  
40 sometimes also felt that professionals were ill-equipped to consider their unique role and needs. Likewise, in  
41 unconventional family set-ups, family members could feel poorly accommodated, for example where women  
42 had new partners who weren't the baby's biological father.  
43  
44  
45  
46  
47

48 It's a grandad's role... You're looked at from the outside world, from doctors and health  
49 professionals and psychiatric healthcare professionals as a dad in that situation... Because the  
50 dynamic of families has changed, the dynamic of the help that is offered to them should be changed.  
51  
52  
53

54 Grandparent 3  
55

## 56 **2.5 The structure of services and separation of families**

57  
58  
59  
60

1  
2  
3 Finally, broader structural issues were sometimes referred to in relation to how and why partners and families  
4 were marginalised from services. In particular, participants noted that inpatient admissions involved separating  
5 family members from each other, often meaning that partners or relatives cared for babies (or older children)  
6 single-handedly while women were hospitalised. While women and their families generally preferred specialist  
7 MBU admissions with their babies over acute ward admissions without them, a disadvantage was that family  
8 members were separated not only from women but also from babies. Although MBUs were perceived as  
9 collaborating better with women's families than other services, some family members felt their set-up made it  
10 difficult for families to fit in, and that the consequences for them of the separation were not fully acknowledged.

11  
12  
13  
14  
15  
16  
17  
18  
19 The only thing that could have been improved on from my perspective was a bit more recognition  
20 from the, the nursery nurses...I'm not resident [on the MBU], I haven't got my stuff there. It's, it  
21 can be quite tricky to suddenly slot into your father role...Not having had a chance to get to know  
22 your baby very much.

23  
24  
25  
26  
27 Partner 12

28  
29 A scarcity of MBUs nationwide, and the wide areas they served, also meant women were regularly admitted to  
30 facilities far from home, meaning their families often faced long journeys to visit them, with little or no financial  
31 support for travel. Nonetheless, MBUs were seen as accommodating family visits well. This contrasted with  
32 acute wards, where experiences of visiting were less positive.

33  
34  
35  
36  
37 You can hear shouting, you can hear screaming...It would be nice to have had a family room away  
38 from the ward...You want to take your child for a walk in the gardens...No. You had to be stuck in  
39 that room. Like I say, it felt like a prison.

40  
41  
42  
43  
44  
45  
46  
47  
48  
49  
50  
51  
52  
53  
54  
55  
56  
57  
58  
59  
60  
Partner 21

61  
62  
63  
64  
65  
66  
67  
68  
69  
70  
71  
72  
73  
74  
75  
76  
77  
78  
79  
80  
81  
82  
83  
84  
85  
86  
87  
88  
89  
90  
91  
92  
93  
94  
95  
96  
97  
98  
99  
100  
101  
102  
103  
104  
105  
106  
107  
108  
109  
110  
111  
112  
113  
114  
115  
116  
117  
118  
119  
120  
121  
122  
123  
124  
125  
126  
127  
128  
129  
130  
131  
132  
133  
134  
135  
136  
137  
138  
139  
140  
141  
142  
143  
144  
145  
146  
147  
148  
149  
150  
151  
152  
153  
154  
155  
156  
157  
158  
159  
160  
161  
162  
163  
164  
165  
166  
167  
168  
169  
170  
171  
172  
173  
174  
175  
176  
177  
178  
179  
180  
181  
182  
183  
184  
185  
186  
187  
188  
189  
190  
191  
192  
193  
194  
195  
196  
197  
198  
199  
200  
201  
202  
203  
204  
205  
206  
207  
208  
209  
210  
211  
212  
213  
214  
215  
216  
217  
218  
219  
220  
221  
222  
223  
224  
225  
226  
227  
228  
229  
230  
231  
232  
233  
234  
235  
236  
237  
238  
239  
240  
241  
242  
243  
244  
245  
246  
247  
248  
249  
250  
251  
252  
253  
254  
255  
256  
257  
258  
259  
260  
261  
262  
263  
264  
265  
266  
267  
268  
269  
270  
271  
272  
273  
274  
275  
276  
277  
278  
279  
280  
281  
282  
283  
284  
285  
286  
287  
288  
289  
290  
291  
292  
293  
294  
295  
296  
297  
298  
299  
300  
301  
302  
303  
304  
305  
306  
307  
308  
309  
310  
311  
312  
313  
314  
315  
316  
317  
318  
319  
320  
321  
322  
323  
324  
325  
326  
327  
328  
329  
330  
331  
332  
333  
334  
335  
336  
337  
338  
339  
340  
341  
342  
343  
344  
345  
346  
347  
348  
349  
350  
351  
352  
353  
354  
355  
356  
357  
358  
359  
360  
361  
362  
363  
364  
365  
366  
367  
368  
369  
370  
371  
372  
373  
374  
375  
376  
377  
378  
379  
380  
381  
382  
383  
384  
385  
386  
387  
388  
389  
390  
391  
392  
393  
394  
395  
396  
397  
398  
399  
400  
401  
402  
403  
404  
405  
406  
407  
408  
409  
410  
411  
412  
413  
414  
415  
416  
417  
418  
419  
420  
421  
422  
423  
424  
425  
426  
427  
428  
429  
430  
431  
432  
433  
434  
435  
436  
437  
438  
439  
440  
441  
442  
443  
444  
445  
446  
447  
448  
449  
450  
451  
452  
453  
454  
455  
456  
457  
458  
459  
460  
461  
462  
463  
464  
465  
466  
467  
468  
469  
470  
471  
472  
473  
474  
475  
476  
477  
478  
479  
480  
481  
482  
483  
484  
485  
486  
487  
488  
489  
490  
491  
492  
493  
494  
495  
496  
497  
498  
499  
500  
501  
502  
503  
504  
505  
506  
507  
508  
509  
510  
511  
512  
513  
514  
515  
516  
517  
518  
519  
520  
521  
522  
523  
524  
525  
526  
527  
528  
529  
530  
531  
532  
533  
534  
535  
536  
537  
538  
539  
540  
541  
542  
543  
544  
545  
546  
547  
548  
549  
550  
551  
552  
553  
554  
555  
556  
557  
558  
559  
560  
561  
562  
563  
564  
565  
566  
567  
568  
569  
570  
571  
572  
573  
574  
575  
576  
577  
578  
579  
580  
581  
582  
583  
584  
585  
586  
587  
588  
589  
590  
591  
592  
593  
594  
595  
596  
597  
598  
599  
600  
601  
602  
603  
604  
605  
606  
607  
608  
609  
610  
611  
612  
613  
614  
615  
616  
617  
618  
619  
620  
621  
622  
623  
624  
625  
626  
627  
628  
629  
630  
631  
632  
633  
634  
635  
636  
637  
638  
639  
640  
641  
642  
643  
644  
645  
646  
647  
648  
649  
650  
651  
652  
653  
654  
655  
656  
657  
658  
659  
660  
661  
662  
663  
664  
665  
666  
667  
668  
669  
670  
671  
672  
673  
674  
675  
676  
677  
678  
679  
680  
681  
682  
683  
684  
685  
686  
687  
688  
689  
690  
691  
692  
693  
694  
695  
696  
697  
698  
699  
700  
701  
702  
703  
704  
705  
706  
707  
708  
709  
710  
711  
712  
713  
714  
715  
716  
717  
718  
719  
720  
721  
722  
723  
724  
725  
726  
727  
728  
729  
730  
731  
732  
733  
734  
735  
736  
737  
738  
739  
740  
741  
742  
743  
744  
745  
746  
747  
748  
749  
750  
751  
752  
753  
754  
755  
756  
757  
758  
759  
760  
761  
762  
763  
764  
765  
766  
767  
768  
769  
770  
771  
772  
773  
774  
775  
776  
777  
778  
779  
780  
781  
782  
783  
784  
785  
786  
787  
788  
789  
790  
791  
792  
793  
794  
795  
796  
797  
798  
799  
800  
801  
802  
803  
804  
805  
806  
807  
808  
809  
810  
811  
812  
813  
814  
815  
816  
817  
818  
819  
820  
821  
822  
823  
824  
825  
826  
827  
828  
829  
830  
831  
832  
833  
834  
835  
836  
837  
838  
839  
840  
841  
842  
843  
844  
845  
846  
847  
848  
849  
850  
851  
852  
853  
854  
855  
856  
857  
858  
859  
860  
861  
862  
863  
864  
865  
866  
867  
868  
869  
870  
871  
872  
873  
874  
875  
876  
877  
878  
879  
880  
881  
882  
883  
884  
885  
886  
887  
888  
889  
890  
891  
892  
893  
894  
895  
896  
897  
898  
899  
900  
901  
902  
903  
904  
905  
906  
907  
908  
909  
910  
911  
912  
913  
914  
915  
916  
917  
918  
919  
920  
921  
922  
923  
924  
925  
926  
927  
928  
929  
930  
931  
932  
933  
934  
935  
936  
937  
938  
939  
940  
941  
942  
943  
944  
945  
946  
947  
948  
949  
950  
951  
952  
953  
954  
955  
956  
957  
958  
959  
960  
961  
962  
963  
964  
965  
966  
967  
968  
969  
970  
971  
972  
973  
974  
975  
976  
977  
978  
979  
980  
981  
982  
983  
984  
985  
986  
987  
988  
989  
990  
991  
992  
993  
994  
995  
996  
997  
998  
999  
1000



1  
2  
3 grandparents...because she was coming right back home...so if the support is not there for her...We  
4  
5 didn't hope that [she] would go back in hospital again, but it happened.  
6

7 Grandparent 2  
8  
9

10 In community settings, structural factors could also contribute to marginalising families. This could occur when  
11 women were seen individually in clinics rather than in their home environment, when family members were  
12 invited to appointments but could not attend because they were during working hours, or where support for  
13 family members was offered at inconvenient times and in awkward locations.  
14  
15  
16

17  
18 They're telling me I have to take time off during the week to get the support we need but I'm  
19 saying, why don't you work a weekend so we can get the support that we need?  
20  
21

22 Partner 14  
23  
24

25 Across all service types there were indications that participants wanted services to be structured in a way that  
26 was more family-oriented or holistic. In inpatient settings, some participants wished family members could stay  
27 overnight on MBUs, with a few women refusing admission because they did not want their family separated. In  
28 the community, some women (and, less commonly, partners) wanted couples/family therapy, saying their  
29 difficulties had persisted after treatment, and that they saw addressing the interpersonal context as important to  
30 resolving their struggles. There were also examples of women questioning why they were treated and medicated  
31 for what they saw as interpersonal difficulties.  
32  
33  
34  
35  
36  
37

38 It would've been nicer to have sort of a more family, I know it doesn't really exist, but more of a  
39 family place that you could, so your partner and mother, so father, mother, and baby could all go  
40 there. And there'd be support for everybody...I think a lot of people would benefit from it.  
41  
42  
43  
44

45 Partner 21  
46  
47

### 48 **3. Ambivalence about family involvement and support**

49 Despite ostensibly wanting more family inclusion and support, many participants simultaneously seemed unsure  
50 about this, suggesting underlying ambivalence. This was not indifference on their part, but rather appeared to  
51 relate to anxieties about what greater family involvement or support would mean, whether it might make  
52 unmanageable demands on them, or have other undesirable consequences. Women's and their partners' and  
53 relatives' mixed feelings about family involvement sometimes seemed to reinforce the tendency for services to  
54 marginalise families creating a vicious cycle.  
55  
56  
57  
58  
59  
60

### 3.1 Feared consequences of family inclusion/support

Women's partners and other family members often described struggling with the burden on them. Many were trying to hold down a job, as well as to support the mothers and cope with the challenges of a new baby.

Although they felt neglected by services, the idea of greater involvement, let alone taking up support themselves, could also feel unmanageable, given the competing demands on their time: "Even the thought of going to see a counsellor for an hour was just like, well I just don't have time for it." (Partner 2).

Not only this, some participants appeared resistant to a greater focus on families for fear this might further disrupt their relationships or the 'status quo'. For example, in one case a woman believed her partner was reluctant to be more involved in her support or accept support himself for fear it might require him to face up to problems in their relationship, and change his behaviour and attitude towards her and their baby. Faced with his resistance, she said professionals seemed to back off, rather than persisting in exploring ways to engage with him.

I don't think [professionals] tried to help him enough to some degree. But then...he wasn't willing to work with me and [our baby]...He didn't want to work with them in any way, shape or form. And too much of self-centred and selfish person. He doesn't want to change...They haven't really tried to guide him in more taking it. They've left it more for him to do.

Mother 33

It was also common for women themselves to express anxiety about the idea of family members being involved in their support, saying they would not 'understand'. This too appeared to relate in part to underlying concerns about what their involvement might mean for family relationships and whether family members might judge women negatively. It also seemed connected to underlying anxieties for women about how family inclusion might affect their protected time with clinicians and autonomy over their treatment, especially for those living in fraught family contexts. As outlined above, privacy was important for some women and, when family members were very involved, this could occasionally leave women themselves feeling deprioritised.

### 3.2 Partners and other family members have to 'stay strong'

Even though they struggled when women were distressed, and with the demands of a new baby, partners and other family members were often uncertain about accepting support themselves. Although they spoke of loss of sleep, anxiety, depression, stress, increased alcohol use and work-related difficulties, some were adamant that

1  
2  
3 they did not need or want support themselves. Others expressed the view that they had to ‘stay strong’ and not  
4  
5 ‘indulge’ their own needs. A few felt more comfortable staying “in the background” (Partner 1) and many  
6  
7 seemed only really to find it acceptable for the mother (and baby) to get help.  
8

9  
10 I was looking after [our baby]. I still hadn’t recovered from the sleep...So I kind of just, I don’t  
11  
12 need anyone’s help, I’m just going to do this...And then, you know, after I’d go and see her at the  
13  
14 MBU, and then I would have my cry...because I was in it and it was happening I just thought I  
15  
16 don’t really need any help, because it was [my wife] that needed the help.  
17

18 Partner 2

19  
20 Several women also subscribed to the view that their partners and wider families were ‘strong’ and not in need  
21  
22 of support. This reduced their inclination to focus on their needs or push for support for them.  
23

24  
25 A number of male partners meanwhile explicitly or implicitly connected their hesitation accessing support  
26  
27 (including peer support) to beliefs that it was shameful and unmanly for men to voice needs. Male partners  
28  
29 appeared to place a high value on not being ‘over-dramatic’: they wanted to wait to see if things would resolve  
30  
31 of their own accord, and to work things out by themselves. At times this seemed to be partly connected to  
32  
33 uncertainty about what it was ‘normal’ to feel in the perinatal period. However, there was also a sense that  
34  
35 feelings of neediness challenged men’s sense of self-worth.  
36

37  
38 As a man, you don’t really need support. You think you can do it on your own. You’ll be fine.  
39

40 Partner 15

41  
42 It was conspicuous that, even when partners and other family members did want help, they often found it  
43  
44 difficult to pinpoint exactly what it was they wanted. Some implied that they were willing to accept support to  
45  
46 help them support women, but were not comfortable with support focused more directly on themselves. Several  
47  
48 participants implied that men, in particular, were more likely to take up support that addressed their own needs  
49  
50 if it was offered in an ‘informal’ or ‘incidental’ way.  
51

52  
53 I kind of enjoy socialising but I don’t like being pushed to meet other people, so yes. That’s just  
54  
55 guys though, more like you know, just they like to do it if it’s natural but if it’s organised you  
56  
57 almost like sniff something, is that a trap?  
58

59 Partner 8  
60

1  
2  
3 This desire for support to be ‘casual’ or ‘understated’ also reinforced the earlier points, where some family  
4 members said they did not so much want formal support, as greater recognition of the challenges they faced.  
5  
6 They wanted to be noticed: for a professional to ask how they were, or to suggest having an “informal chat”.  
7  
8

## 9 **Discussion**

10  
11 In the UK, the newly published NHS long-term plan (20) emphasises the importance of mental health services  
12 working with and supporting the families of perinatal women. The importance of this is also increasingly  
13 recognised internationally, both in Western and non-Western societies (13,21). Yet relatively little is known  
14 about experiences of family involvement and support in practice. This study explored views of how services  
15 supporting women with perinatal mental health difficulties work with their families, from the perspectives of  
16 women, their partners and wider families. Women in the study had accessed treatment from a wide array of UK  
17 services for a range of diagnoses. They came from a broad mixture of socio-demographic and cultural  
18 backgrounds, and lived in differing family set-ups. Along with their partners and family members, they gave  
19 rich, qualitative accounts of their experiences.  
20  
21

22  
23 Overall, analysis suggested that women’s perinatal mental health difficulties need to be considered with  
24 reference to their family and interpersonal contexts. Contact with services takes place in the midst of complex  
25 relationship dynamics, which are in a state of flux with the arrival of a new baby. Although it was the women  
26 who had been diagnosed with perinatal mental health difficulties, their struggles often seemed to signify  
27 difficulties between family members, as much as within individual mothers, and with all members of a family  
28 experiencing distress. The perinatal period is a critical risk time for relationship strain and even domestic  
29 violence (22), and women in particular often connected their perinatal mental health difficulties to familial  
30 struggles (e.g. expressing frustration at having to take on the bulk of parenting), with families also playing a  
31 major role in relation to access to support and recovery.  
32  
33

34  
35 Despite this, services were experienced as focusing on individual women (and babies), and not often engaging  
36 in a meaningful way with families or the interpersonal context. Services were seen as being structured in ways  
37 that tended to exclude family members, and professionals were experienced at times as ill-equipped and under-  
38 resourced to work with families. Family members were not regularly included in appointments, or kept informed  
39 about women’s treatment, or asked for their own perspective, and there was a lack of acknowledgement of their  
40 needs or support for them. Though there were exceptions, this meant partners and families were often left  
41 feeling marginalised, unheard and unsupported, while women and their families said difficulties sometimes  
42  
43  
44  
45  
46  
47  
48  
49  
50  
51  
52  
53  
54  
55  
56  
57  
58  
59  
60

1  
2  
3 persisted after treatment because of a lack of wider focus. This study builds on our previous research which  
4 similarly highlighted the marginalisation of women's partners across a range of countries and service settings  
5 (15). This study suggests this marginalisation extends beyond partners to members of the wider family too. It  
6  
7 also echoes wider research, which shows that partners and wider families can feel excluded by mental health  
8  
9 services outside of the perinatal period too (23, 24). Although families felt neglected across all types of service,  
10  
11 MBUs were generally reported to be better at engaging with families than other services.  
12  
13

14  
15 Nevertheless, responses also suggested that it could be complex for professionals to balance family inclusion  
16  
17 with the need to protect and prioritise women and their babies. This was especially true in light of women's  
18  
19 fraught and sometimes abusive family contexts and, in some cases, their expressed desire for privacy from their  
20  
21 families. Not only this, although women's families ostensibly wanted to be better included and supported, they  
22  
23 also expressed ambivalence about this. In line with previous research (25,26), perceived norms of masculinity  
24  
25 and fatherhood meant that male partners/fathers found it hard to acknowledge their own needs. Likewise, other  
26  
27 family members often believed they had to 'stay strong'. Greater involvement and support could also feel  
28  
29 unmanageable, given how much families already had to cope with, and there were signs too that women and  
30  
31 their families were fearful about the possible disruption to their relationships and the 'status quo' that a greater  
32  
33 focus on families could entail. This appeared to reinforce the tendency for services to overlook and exclude  
34  
35 families, which, in turn, arguably contributed to increasing their perception of their own needs as insignificant in  
36  
37 a vicious cycle.

38  
39 Viewed in their broader context, the findings suggest that mental health services supporting perinatal women  
40  
41 tend to reflect and reinforce pervasive social norms and practices around motherhood, fatherhood and infant  
42  
43 development. As described in the introduction, in wider society women are typically seen as natural nurturers  
44  
45 who are expected to assume primary responsibility for infant development; fathers are encouraged to be 'equal'  
46  
47 partners but, in reality, are relegated to the periphery (17). Our findings suggest that these culturally-embedded  
48  
49 expectations place pressure on both women and their families which - along with other challenges - can  
50  
51 contribute to provoking perinatal distress and can bring family members into conflict with each other. Yet  
52  
53 instead of seeking to understand perinatal distress within its wider context - or indeed to challenge the structures  
54  
55 and norms that may produce and maintain it - services appear focused on diagnosing and treating individual  
56  
57 women, arguably even aiming to help them adjust to their expected role as primary nurturers, while  
58  
59 marginalising fathers and wider families. In this way, rather than challenging dominant norms, services allow  
60  
61 them to shape and guide practice. This is arguably further exacerbated by wider persisting cultural views of

1  
2  
3 women as prone to ‘hysteria’ (itself derived from the Greek for ‘uterus’), with men expected to be emotionally  
4 undemanding (27), and by a broader tendency within psychiatry to see distress as located within individuals’  
5 minds, deflecting from the need to address people’s wider social, political or interpersonal contexts (28).  
6  
7  
8

### 9 **Strengths and limitations**

10  
11 This study addressed a gap in the research literature, by interviewing a diverse group of women, as well as their  
12 partners, and wider family members about experiences of how services work with the families of women  
13 diagnosed with perinatal mental health difficulties. Nevertheless, it also had several limitations.  
14  
15

16  
17 Firstly, as this study was nested within a wider research programme, only parts of each interview focused on  
18 experiences of family inclusion, limiting the time that could be spent discussing this topic, particularly as such a  
19 wide array of services were included. While rich data were nevertheless obtained, future research may benefit  
20 from dedicating full interviews to this topic. Secondly, interviews with women and their family members were  
21 analysed separately for the purposes of this paper. However, future research may benefit from analysing ‘pairs’  
22 of interviews together to allow closer comparison and contrast of different perspectives. Thirdly, while in most  
23 cases interviews were carried out separately with women and their family members, in exceptional cases both  
24 were present. This could have had implications for what participants were willing to share in these cases (e.g. if  
25 they were unwilling to disclose some information in front of each other). Fourthly, interviews were carried out  
26 at 6-9 months postnatally, when treatment was often very recent or ongoing. It may be valuable for future  
27 research to follow-up families later once they have had longer to reflect on their experiences. Fifthly, it may  
28 have been valuable to have involved partners or grandparents in conducting interviews, to see if this generated  
29 unique insights based on shared perspectives. Inevitably researchers’ own experiences (e.g. of motherhood and  
30 perinatal mental health care) affect their interactions with participants and interpretations of the data: a male  
31 interviewer may, for example, have elicited different data from male partners, but all researchers were female.  
32  
33 Finally, future research would benefit from exploring the perspectives of clinicians too, and placing greater  
34 emphasis on possible solutions to the challenges identified.  
35  
36  
37  
38  
39  
40  
41  
42  
43  
44  
45  
46  
47  
48  
49  
50

### 51 **Implications and conclusions**

52  
53 Study findings suggest that engaging with wider interpersonal networks is challenging and complex, but too  
54 important to ignore. Perinatal mental health difficulties, and access to treatment, do not occur within a vacuum,  
55 but within a wider social and interpersonal context, in which the family plays an influential role. Our findings  
56 suggest a need for professionals to approach women’s difficulties with greater focus on their social networks  
57  
58  
59  
60

1  
2  
3 and to proactively challenge the ways in which the current set-up of services may reinforce dominant gender  
4 norms, and allow them to guide practice. At the same time, participants' ambivalence about family inclusion and  
5 the divergent needs and wishes expressed means there is a danger in making assumptions about what might be  
6 most helpful for them or how this might best work. Instead, at this stage research evidence is needed evaluating  
7 the effectiveness, acceptability and potential pitfalls of a range of potential approaches, preferably based on co-  
8 production principles to ensure the views of people with relevant lived experience and clinicians are central.  
9

10  
11 Possible approaches that merit further exploration include: (i) considering how to adapt current practice to make  
12 it more family-friendly (e.g. by identifying acceptable ways to include partners/relatives more meaningfully in  
13 (at least some) appointments); (ii) challenging the way service structures currently deprioritise family members'  
14 needs, but also balancing this with protecting women's needs. (iii) developing or adapting couple or family-  
15 focused interventions for perinatal populations: previous reviews suggest that family therapy can help address  
16 and prevent perinatal depression (29,30), and that couple psychoeducation can support the transition to  
17 parenthood (31). In England, clinical guidelines recommend couple or family approaches for some perinatal  
18 mental health difficulties (14), but such interventions are rarely available and have not been extensively tested in  
19 the perinatal period (22); (iv) developing and testing resources/interventions aimed at women's partners and  
20 wider families, acknowledging that some will themselves also have perinatal mental health needs. This will need  
21 to take into account that some family members express a preference for more 'informal' or 'incidental' forms of  
22 support (though this also may be partly a result of services treating them as ancillary); (v) trialling specific staff  
23 training around engaging with families in the perinatal period, including awareness of cultural diversity.  
24  
25

26  
27 At the same time, it is important to ensure that any changes to practice do not result in simply pathologising  
28 fathers as well as mothers, or holding families solely responsible for problems relating to perinatal distress  
29 and/or infant development. Rather, there is a need to look beyond the family as well, recognising that families  
30 too are operating within the constraints of their broader social contexts and the resources available to them (32).  
31 This may entail advocating for broader social changes to lessen the pressures on families.  
32  
33

### 34 **Funding**

35 This paper summarises independent research funded by the National Institute for Health Research (NIHR) under  
36 its PGfAR Programme (Grant Reference Number RP-PG-1210-12002). The views expressed are those of the  
37 authors and not necessarily those of the NIHR or the Department of Health and Social Care. The study team  
38 acknowledges the study delivery support given by the local Clinical Research Networks.  
39  
40  
41  
42  
43  
44  
45  
46  
47  
48  
49  
50

1  
2  
3 SJ is supported by the NIHR Mental Health Research Policy Unit, the NIHR Collaboration for Leadership in  
4 Applied Health Research and Care (CLAHRC) North Thames and the UCLH Biomedical Research Centre.  
5  
6  
7  
8  
9

#### 10 **Author contribution**

11  
12  
13 BLT contributed to study concept and design, data collection, data analysis, interpretation of results and drafting  
14 of the manuscript. JB, NM, DB and SJ contributed to study concept and design and drafting of the manuscript.

15  
16 All authors read and approved the final manuscript.

17  
18  
19 The authors declare that no competing interests exist.  
20  
21

22 **Data sharing:** The datasets generated and/or analysed during the current study are not publicly available due to  
23 them containing information that could compromise research participant privacy/consent but are available from  
24 the corresponding author on reasonable request.  
25  
26  
27

28 **Acknowledgements:** The authors are very grateful indeed for the advice and support received from the  
29 Perinatal Service User and Carer Advisory Group, and from the wider ESMI study team. The study team would  
30 also like to thank all the women and their family members who gave up their time to take part in the study.  
31  
32  
33  
34  
35  
36  
37  
38  
39  
40  
41  
42  
43  
44  
45  
46  
47  
48  
49  
50  
51  
52  
53  
54  
55  
56  
57  
58  
59  
60



## References

1. Davey SJ, Dziurawiec S, O'Brien-Malone A. Men's voices: postnatal depression from the perspective of male partners. *Qual Health Res.* 2006 Feb;16(2):206–20.
2. Engqvist I, Nilsson K. Men's experience of their partners' postpartum psychiatric disorders: narratives from the internet. *Ment Health Fam Med.* 2011 Sep;8(3):137–46.
3. Muchena G. Men's experiences of partners' postnatal mental illness. *Nurs Times.* 2007;103(48):32–3.
4. Boddy R, Gordon C, MacCallum F, McGinness M. Men's experiences of having a partner who requires Mother and Baby Unit admission for first episode postpartum psychosis. *J Adv Nurs.* 2017 Feb;73(2):399–409.
5. Blackmore ER, Rubinow DR, O'Connor TG, Liu X, Tang W, Craddock N, et al. Reproductive outcomes and risk of subsequent illness in women diagnosed with postpartum psychosis. *Bipolar Disord.* 2013 Jun;15(4):394–404.
6. Paulson JF, Bazemore SD. Prenatal and postpartum depression in fathers and its association with maternal depression: a meta-analysis. *JAMA.* 2010 May 19;303(19):1961–9.
7. Boath EH, Pryce AJ, Cox JL. Postnatal depression: The impact on the family. *J Reprod Infant Psychol.* 1998 May 1;16(2–3):199–203.
8. Stein A, Pearson RM, Goodman SH, Rapa E, Rahman A, McCallum M, et al. Effects of perinatal mental disorders on the fetus and child. *The Lancet.* 2014 Nov 15;384(9956):1800–19.
9. Leahy-Warren P, McCarthy G, Corcoran P. First-time mothers: social support, maternal parental self-efficacy and postnatal depression. *J Clin Nurs.* 2012 Feb;21(3–4):388–97.
10. Grube M. Inpatient treatment of women with postpartum psychiatric disorders--the role of the male partners. *Arch Womens Ment Health.* 2005 Sep;8(3):163–70.
11. Holopainen D. The experience of seeking help for postnatal depression. *Aust J Adv Nurs Q Publ R Aust Nurs Fed.* 2002 May;19(3):39–44.
12. Letourneau N, Duffett-Leger L, Stewart M, Hegadoren K, Dennis C-L, Rinaldi CM, et al. Canadian mothers' perceived support needs during postpartum depression. *J Obstet Gynecol Neonatal Nurs JOGNN.* 2007 Oct;36(5):441–9.
13. The Royal Australian and New Zealand College of Obstetricians and Gynaecologists (RANZCOG). Mental health care in the perinatal period. [cited 2019 Mar 3]. Available from: [https://www.ranzcog.edu.au/RANZCOG\\_SITE/media/RANZCOG-MEDIA/Women%27s%20Health/Statement%20and%20guidelines/Clinical-Obstetrics/Mental-health-care-in-the-perinatal-period-\(C-Obs-48\).pdf?ext=.pdf](https://www.ranzcog.edu.au/RANZCOG_SITE/media/RANZCOG-MEDIA/Women%27s%20Health/Statement%20and%20guidelines/Clinical-Obstetrics/Mental-health-care-in-the-perinatal-period-(C-Obs-48).pdf?ext=.pdf)
14. National Institute for Health and Clinical Excellence. Antenatal and postnatal mental health: clinical management and service guidance, Clinical Guideline CG192. 2014.
15. Lever Taylor B, Billings J, Morant N, Johnson S. How do women's partners view perinatal mental health services? A qualitative meta-synthesis. *Clin Psychol Psychother.* 2018 Jan;25(1):112–29.
16. Machin AJ. Mind the Gap: The expectation and reality of involved fatherhood. *Father J Theory Res Men Parents.* 2015;13(1):36–59.
17. Tessa Baradon [Internet blog]. [cited 2019 Apr 7]. 'Out of mind': why do perinatal services not engage with fathers? Available from: <https://www.annafreud.org/insights/blogs/2019/03/out-of-mind-why-do-perinatal-services-not-engage-with-fathers/>

- 1
- 2
- 3 18. Hogg S. All Babies Count: spotlight on perinatal mental health - prevention in mind. National Society for
- 4 the Prevention of Cruelty to Children; 2013.
- 5
- 6 19. Braun V, Clarke V. Using thematic analysis in psychology. *Qual Res Psychol*. 2006 Jan 1;3(2):77–101.
- 7
- 8 20. NHS England. NHS long-term plan [Internet]. [cited 2019 Jan 15]. Available from:
- 9 <https://www.longtermplan.nhs.uk/wp-content/uploads/2019/01/nhs-long-term-plan.pdf>
- 10
- 11 21. WHO | Interventions for common perinatal mental disorders in women in low- and middle-income
- 12 countries: a systematic review and meta-analysis [Internet]. WHO. [cited 2019 Apr 17]. Available from:
- 13 <https://www.who.int/bulletin/volumes/91/8/12-109819/en/>
- 14
- 15 22. Rosan C, Grimas E. (PDF) The power of couple-focused approaches in the perinatal period. *J Fam Health*
- 16 *Care*. 2016;26(1):10–3.
- 17
- 18 23. Rose, L. E., Mallinson, R. K., & Walton-Moss, B. Barriers to family care in psychiatric settings. *Journal*
- 19 *of Nursing Scholarship: An Official Publication of Sigma Theta Tau International Honor Society of*
- 20 *Nursing*. 2004. 36(1), 39–47.
- 21
- 22 24. Wilkinson, C, McAndrew, S. ‘I’m not an outsider, I’m his mother!’ A phenomenological enquiry into
- 23 carer experiences of exclusion from acute psychiatric settings. *International Journal of Mental Health*
- 24 *Nursing*. 2008. 17(6), 392-401.
- 25
- 26 25. Allen K. Father experience of postpartum depression. Alliant International University; 2010.
- 27
- 28 26. Letourneau N, Duffett-Leger L, Dennis C-L, Stewart M, Tryphonopoulos PD. Identifying the support
- 29 needs of fathers affected by post-partum depression: a pilot study. *J Psychiatr Ment Health Nurs*. 2011
- 30 Feb;18(1):41–7.
- 31
- 32 27. Addis ME, Mahalik JR. Men, masculinity, and the contexts of help seeking. *Am Psychol*. 2003
- 33 Jan;58(1):5–14.
- 34
- 35 28. Filson, B. The Haunting Can End: trauma-informed approaches in healing from abuse and adversity.
- 36 Chapter 3 in *Searching for a Rose Garden: Challenging Psychiatry, Fostering Mad Studies*. Eds J Russo,
- 37 A Sweeney. 2016. pp 20-24.
- 38
- 39 29. Cluxton-Keller F, Bruce ML. Clinical effectiveness of family therapeutic interventions in the prevention
- 40 and treatment of perinatal depression: A systematic review and meta-analysis. *PLoS ONE* [Internet]. 2018
- 41 Jun 14 [cited 2019 Apr 17];13(6).
- 42
- 43 30. Pinquart M, Teubert D. A Meta-analytic Study of Couple Interventions During the Transition to
- 44 Parenthood. *Fam Relat*. 2010;59(3):221–31.
- 45
- 46 31. Petch J, Halford WK. Psycho-education to enhance couples’ transition to parenthood. *Clin Psychol Rev*.
- 47 2008 Oct 1;28(7):1125–37.
- 48
- 49 32. Dallos R, Urry A. Abandoning our parents and grandparents: does social construction mean the end of
- 50 systemic family therapy? *J Fam Ther*. 1999 May;21(2):161–86.
- 51
- 52
- 53
- 54
- 55
- 56
- 57
- 58
- 59
- 60

## Diagram of key themes expressed regarding different types of mental health service

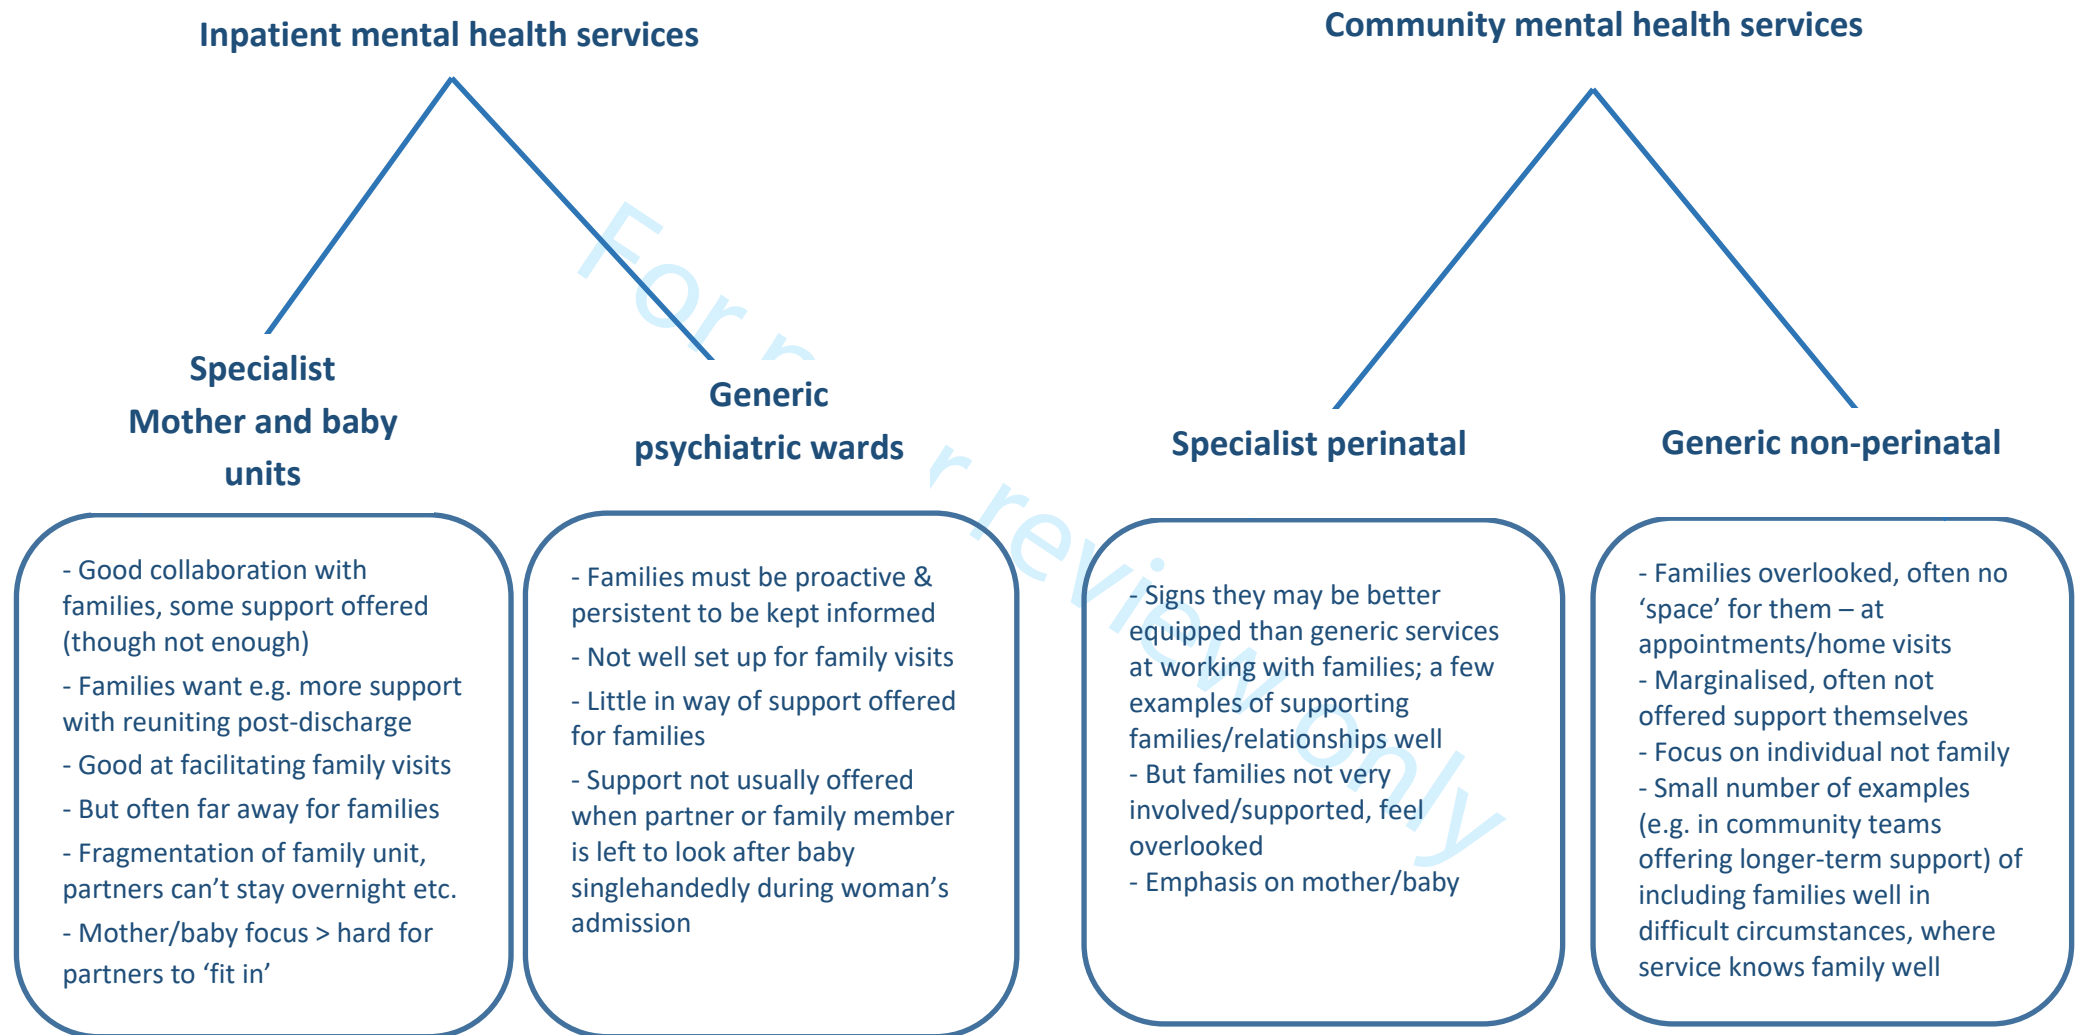

**Diagram of key themes by type of participant****Women**

- Many women say interpersonal conflict contributed to or exacerbated their perinatal distress.
- Believe their partners & families are marginalised, disregarded; want them to be helped to support them better, and offered support themselves.
- Women more likely than partners/other family members to mention wanting couple/family therapy.
- However, they also harbour anxiety about potential of family involvement/support to disrupt relationships further, marginalise their own needs, reduce their autonomy etc. Some women want privacy from their families.

**Partners and wider families**

- Partners and wider families struggle themselves with adjustment to having a new baby; with impact of woman's struggles.
- Feel overlooked, marginalised by services.
- Want to be better informed about how to support women, and want their own needs to be acknowledged – someone to think about them, ask them how they are doing.
- But also they fear greater involvement might be unmanageable – they won't have the time or energy.

**Partners**

- Anxious also about possible destabilising effect of greater focus on them, possibility they might be required to change
- Feel they should 'be strong', not need help, norms of masculinity make it harder for men to accept support
- Say they prefer 'informal or 'incidental' support

**Wider family**

- Face difficulties relating to their unique role not being recognised. For example, grandparents being treated by professionals as a 'substitute partner' where mother is single
- Feel as 'carer' they should 'be strong', not need help, not take attention away from woman

## COREQ (CONsolidated criteria for REporting Qualitative research) Checklist

A checklist of items that should be included in reports of qualitative research. You must report the page number in your manuscript where you consider each of the items listed in this checklist. If you have not included this information, either revise your manuscript accordingly before submitting or note N/A.

| Topic                                          | Item No. | Guide Questions/Description                                                                                                                              | Reported on Page No. |
|------------------------------------------------|----------|----------------------------------------------------------------------------------------------------------------------------------------------------------|----------------------|
| <b>Domain 1: Research team and reflexivity</b> |          |                                                                                                                                                          |                      |
| <i>Personal characteristics</i>                |          |                                                                                                                                                          |                      |
| Interviewer/facilitator                        | 1        | Which author/s conducted the interview or focus group?                                                                                                   |                      |
| Credentials                                    | 2        | What were the researcher's credentials? E.g. PhD, MD                                                                                                     |                      |
| Occupation                                     | 3        | What was their occupation at the time of the study?                                                                                                      |                      |
| Gender                                         | 4        | Was the researcher male or female?                                                                                                                       |                      |
| Experience and training                        | 5        | What experience or training did the researcher have?                                                                                                     |                      |
| <i>Relationship with participants</i>          |          |                                                                                                                                                          |                      |
| Relationship established                       | 6        | Was a relationship established prior to study commencement?                                                                                              |                      |
| Participant knowledge of the interviewer       | 7        | What did the participants know about the researcher? e.g. personal goals, reasons for doing the research                                                 |                      |
| Interviewer characteristics                    | 8        | What characteristics were reported about the interviewer/facilitator? e.g. Bias, assumptions, reasons and interests in the research topic                |                      |
| <b>Domain 2: Study design</b>                  |          |                                                                                                                                                          |                      |
| <i>Theoretical framework</i>                   |          |                                                                                                                                                          |                      |
| Methodological orientation and Theory          | 9        | What methodological orientation was stated to underpin the study? e.g. grounded theory, discourse analysis, ethnography, phenomenology, content analysis |                      |
| <i>Participant selection</i>                   |          |                                                                                                                                                          |                      |
| Sampling                                       | 10       | How were participants selected? e.g. purposive, convenience, consecutive, snowball                                                                       |                      |
| Method of approach                             | 11       | How were participants approached? e.g. face-to-face, telephone, mail, email                                                                              |                      |
| Sample size                                    | 12       | How many participants were in the study?                                                                                                                 |                      |
| Non-participation                              | 13       | How many people refused to participate or dropped out? Reasons?                                                                                          |                      |
| <i>Setting</i>                                 |          |                                                                                                                                                          |                      |
| Setting of data collection                     | 14       | Where was the data collected? e.g. home, clinic, workplace                                                                                               |                      |
| Presence of non-participants                   | 15       | Was anyone else present besides the participants and researchers?                                                                                        |                      |
| Description of sample                          | 16       | What are the important characteristics of the sample? e.g. demographic data, date                                                                        |                      |
| <i>Data collection</i>                         |          |                                                                                                                                                          |                      |
| Interview guide                                | 17       | Were questions, prompts, guides provided by the authors? Was it pilot tested?                                                                            |                      |
| Repeat interviews                              | 18       | Were repeat interviews carried out? If yes, how many?                                                                                                    |                      |
| Audio/visual recording                         | 19       | Did the research use audio or visual recording to collect the data?                                                                                      |                      |
| Field notes                                    | 20       | Were field notes made during and/or after the interview or focus group?                                                                                  |                      |
| Duration                                       | 21       | What was the duration of the interviews or focus group?                                                                                                  |                      |
| Data saturation                                | 22       | Was data saturation discussed?                                                                                                                           |                      |
| Transcripts returned                           | 23       | Were transcripts returned to participants for comment and/or                                                                                             |                      |

| Topic                                  | Item No. | Guide Questions/Description                                                                                                        | Reported on Page No. |
|----------------------------------------|----------|------------------------------------------------------------------------------------------------------------------------------------|----------------------|
|                                        |          | correction?                                                                                                                        |                      |
| <b>Domain 3: analysis and findings</b> |          |                                                                                                                                    |                      |
| <i>Data analysis</i>                   |          |                                                                                                                                    |                      |
| Number of data coders                  | 24       | How many data coders coded the data?                                                                                               |                      |
| Description of the coding tree         | 25       | Did authors provide a description of the coding tree?                                                                              |                      |
| Derivation of themes                   | 26       | Were themes identified in advance or derived from the data?                                                                        |                      |
| Software                               | 27       | What software, if applicable, was used to manage the data?                                                                         |                      |
| Participant checking                   | 28       | Did participants provide feedback on the findings?                                                                                 |                      |
| <i>Reporting</i>                       |          |                                                                                                                                    |                      |
| Quotations presented                   | 29       | Were participant quotations presented to illustrate the themes/findings?<br>Was each quotation identified? e.g. participant number |                      |
| Data and findings consistent           | 30       | Was there consistency between the data presented and the findings?                                                                 |                      |
| Clarity of major themes                | 31       | Were major themes clearly presented in the findings?                                                                               |                      |
| Clarity of minor themes                | 32       | Is there a description of diverse cases or discussion of minor themes?                                                             |                      |

Developed from: Tong A, Sainsbury P, Craig J. Consolidated criteria for reporting qualitative research (COREQ): a 32-item checklist for interviews and focus groups. *International Journal for Quality in Health Care*. 2007. Volume 19, Number 6: pp. 349 – 357

**Once you have completed this checklist, please save a copy and upload it as part of your submission. DO NOT include this checklist as part of the main manuscript document. It must be uploaded as a separate file.**
