# Supplementary material for: Experiences of how services supporting women with perinatal mental health difficulties work with their families: a qualitative study in England
Source: PubMed Central journal article supplement — BMJ Open. 2019 Jul 24;9(7):e030208. doi: 10.1136/bmjopen-2019-030208 (PMC6661627; doi:10.1136/bmjopen-2019-030208), 2019-07-24
Supplement: bmjopen-2019-030208supp001.pdf [file bmjopen-2019-030208supp001.pdf]

## Diagram of key themes expressed regarding different types of mental health service

### Inpatient mental health services

### Community mental health services

#### Specialist Mother and Baby Units (MBUs)

- Good collaboration with families, some support offered (though not enough)
- Families want e.g. more support with reuniting post-discharge
- Good at facilitating family visits
- But often far away for families
- Fragmentation of family unit, partners can't stay overnight etc.
- Mother/baby focus > hard for partners to 'fit in'

#### General psychiatric wards

- Families must be proactive & persistent to be kept informed
- Not well set up for family visits
- Little in way of support offered for families
- Support not usually offered when partner or family member is left to look after baby singlehandedly during woman's admission

#### Specialist perinatal

- Signs they may be better equipped than generic services at working with families; a few examples of supporting families/relationships well
- But families not very involved/supported, feel overlooked
- Emphasis on mother/baby

#### Generic non-perinatal

- Families overlooked, often no 'space' for them – at appointments/home visits
- Marginalised, often not offered support themselves
- Focus on individual not family
- Small number of examples (e.g. in community teams offering longer-term support) of including families well in difficult circumstances, where service knows family well
